# Supplementary material for: PyBroP-mediated nucleophilic addition of oxindoles with pyridine N-oxides to access 3-pyridyl-3,3-disubstituted oxindoles
Source: Royal Society of Chemistry journal article supplement (doi:10.1039/d3nj04907h), 2023-12-07

## **PyBroP-mediated nucleophilic addition of oxindoles with pyridine *N*-oxides to access 3-pyridyl-3,3-disubstituted oxindoles**

Fuzhong Han,<sup>\*, a, b</sup> Wenjia Xiao<sup>a</sup>, Lina Jia,<sup>a, b</sup> and Xiangping Hu<sup>\*, c</sup>

<sup>a</sup>*College of Chemistry and Chemical Engineering, Qiqihar University, Qiqihar 161006, China.*

<sup>b</sup>*Heilongjiang Provincial Key Laboratory of Catalytic Synthesis for Fine Chemicals, Qiqihar 161006, China*

<sup>c</sup>*Dalian Institute of Chemical Physics, Chinese Academy of Sciences, Dalian 116023, China.*

*E-mail: hanfuzhongchn@163.com*

### **Supporting Information**

## A. General Information

All reactions were carried out under air. Oxindoles **1**<sup>1</sup> and pyridine *N*-oxides **2**<sup>2</sup> were synthesized according to reported procedures. Commercial reagent (PyBroP) were used without further purification. Flash chromatography was performed on silica gel 60 (40-63 $\mu$ m, 60Å). Thin layer chromatography (TLC) was performed on glass plates coated with silica gel 60 with F254 indicator. Proton nuclear magnetic resonance (<sup>1</sup>H NMR) spectra were recorded on a Bruker 600 MHz spectrometer. Chemical shifts for protons are reported in parts per million downfield from tetramethylsilane and are referenced to residual protium in the NMR solvent (CDCl<sub>3</sub> =  $\delta$  7.26, DMSO =  $\delta$  2.54). Carbon nuclear magnetic resonance (<sup>13</sup>C NMR) spectra were recorded on a Bruker 150 MHz spectrometer. Chemical shifts for carbon are reported in parts per million downfield from tetramethylsilane and are referenced to the carbon resonances of the solvent (CDCl<sub>3</sub> =  $\delta$  77.16, DMSO =  $\delta$  39.50). Data are represented as follows: chemical shift, multiplicity (br = broad, s = singlet, d = doublet, t = triplet, q = quartet, m = multiplet), coupling constants in Hertz (Hz), integration. Electrospray ionization high-resolution mass spectra (ESI-HRMS) were recorded on a Bruke P-SIMS-Gly FT-ICR mass spectrometer.

### General procedure for the nucleophilic addition of oxindoles with pyridine *N*-oxides.

An Ar-filled 25 mL Schlenk tube was charged with oxindoles **1** (0.5 mmol), pyridine *N*-oxides **2** (0.75 mmol), Et<sub>3</sub>N (1.5 mmol), PyBroP (0.65 mmol) and 1,4-dioxane (3 mL). The mixture was stirred at 25 °C for 12 h, after concentration under reduced pressure, the resulting residue was purified by column chromatography (SiO<sub>2</sub>; hexanes/EtOAc, 10:1-4:1) to afford the desired product **3**.

**Tert-butyl 3-benzyl-2-oxo-3-(pyridin-2-yl)indoline-1-carboxylate (3aa).** White solid, 95% yield, m.p. = 83.6-84.4 °C. <sup>1</sup>H NMR (600 MHz, CDCl<sub>3</sub>)  $\delta$  8.72 (d, *J* = 4.2 Hz, 1H), 7.69 (t, *J* = 7.4 Hz, 1H), 7.58 (d, *J* = 8.1 Hz, 1H), 7.43 (d, *J* = 7.3 Hz, 1H), 7.31 (d, *J* = 8.0 Hz, 1H), 7.22 (td, *J* = 7.9, 1.4 Hz, 1H), 7.17-7.14 (m, 1H), 7.08 (dd, *J* = 8.4, 6.2 Hz, 1H), 7.03 (t, *J* = 7.4 Hz, 2H), 6.86 (d, *J* = 7.2 Hz, 2H), 3.84 (dd, *J* = 30.5, 13.0 Hz, 2H), 1.55 (s, 9H). <sup>13</sup>C NMR (151 MHz, CDCl<sub>3</sub>)  $\delta$  175.8, 158.4, 149.3, 148.7, 139.7, 137.1, 135.1, 130.2, 130.1, 128.5, 127.6, 126.7, 125.1, 124.3, 122.6, 122.1, 114.8, 84.1, 61.2, 44.1, 28.0. HRMS (ESI) *m/z*: [M+H]<sup>+</sup> calcd. for C<sub>25</sub>H<sub>25</sub>N<sub>2</sub>O<sub>3</sub>, 401.1865, found: 401.1845.

**Tert-butyl 3-(4-methylbenzyl)-2-oxo-3-(pyridin-2-yl)indoline-1-carboxylate (3ba).** Yellow oil, 95% yield. <sup>1</sup>H NMR (400 MHz, CDCl<sub>3</sub>)  $\delta$  8.67 (dd, *J* = 4.8, 0.9 Hz, 1H), 7.64-7.59 (m, 2H), 7.34 (dd, *J* = 7.4, 1.1 Hz, 1H), 7.26-7.23 (m, 1H), 7.23-7.18 (m, 2H), 7.15 (dt, *J* = 7.5, 3.8 Hz, 1H), 6.83 (d, *J* = 7.9 Hz, 2H),

6.73 (d,  $J = 8.0$  Hz, 2H), 3.73 (t,  $J = 9.9$  Hz, 2H), 2.19 (s, 3H), 1.55 (s, 9H).  $^{13}\text{C}$  NMR (101 MHz,  $\text{CDCl}_3$ )  $\delta$  176.0, 158.7, 149.5, 148.8, 139.8, 136.7, 136.2, 132.0, 130.5, 129.9, 128.4, 128.3, 125.0, 124.2, 122.5, 121.9, 114.8, 83.9, 61.3, 43.7, 28.0, 21.0. HRMS (ESI)  $m/z$ :  $[\text{M}+\text{H}]^+$  calcd. for  $\text{C}_{26}\text{H}_{27}\text{N}_2\text{O}_3$ , 415.2022, found: 415.2007.

**Tert-butyl 3-(4-methoxybenzyl)-2-oxo-3-(pyridin-2-yl)indoline-1-carboxylate (3ca).** Yellow oil, 93% yield.  $^1\text{H}$  NMR (600 MHz,  $\text{CDCl}_3$ )  $\delta$  8.69 (d,  $J = 4.0$  Hz, 1H), 7.66-7.63 (m, 1H), 7.60 (d,  $J = 8.1$  Hz, 1H), 7.38 (d,  $J = 7.4$  Hz, 1H), 7.28 (d,  $J = 8.0$  Hz, 1H), 7.24-7.21 (m, 2H), 7.15 (td,  $J = 7.5, 0.9$  Hz, 1H), 6.77 (d,  $J = 8.7$  Hz, 2H), 6.58-6.56 (m, 2H), 3.75 (s, 2H), 3.68 (s, 3H), 1.56 (s, 9H).  $^{13}\text{C}$  NMR (151 MHz,  $\text{CDCl}_3$ )  $\delta$  176.1, 158.6, 158.4, 149.5, 148.8, 139.8, 136.8, 131.1, 130.4, 128.4, 127.2, 125.0, 124.20, 122.5, 121.9, 114.9, 113.1, 84.0, 61.4, 55.1, 43.4, 28.0. HRMS (ESI)  $m/z$ :  $[\text{M}+\text{H}]^+$  calcd. for  $\text{C}_{26}\text{H}_{27}\text{N}_2\text{O}_4$ , 431.1971, found: 431.1955.

**Tert-butyl 3-(4-bromobenzyl)-2-oxo-3-(pyridin-2-yl)indoline-1-carboxylate (3da).** Yellow oil, 90% yield.  $^1\text{H}$  NMR (600 MHz,  $\text{CDCl}_3$ )  $\delta$  8.68 (dd,  $J = 4.4, 1.4$  Hz, 1H), 7.64-7.59 (m, 2H), 7.36 (dd,  $J = 7.5, 0.8$  Hz, 1H), 7.25-7.20 (m, 3H), 7.16 (dq,  $J = 4.9, 2.8$  Hz, 3H), 6.72 (d,  $J = 8.4$  Hz, 2H), 3.76 (t,  $J = 9.2$  Hz, 2H), 1.57 (s, 9H).  $^{13}\text{C}$  NMR (151 MHz,  $\text{CDCl}_3$ )  $\delta$  175.6, 158.0, 149.3, 148.5, 139.6, 137.2, 134.2, 131.8, 130.8, 129.8, 128.7, 125.0, 124.4, 122.7, 122.1, 121.0, 115.0, 84.4, 61.0, 43.4, 28.0. HRMS (ESI)  $m/z$ :  $[\text{M}+\text{H}]^+$  calcd. for  $\text{C}_{25}\text{H}_{24}\text{BrN}_2\text{O}_3$ , 479.0970, found: 479.0953.

**Tert-butyl 3-(4-chlorobenzyl)-2-oxo-3-(pyridin-2-yl)indoline-1-carboxylate (3ea).** Yellow oil, 89% yield.  $^1\text{H}$  NMR (600 MHz,  $\text{CDCl}_3$ )  $\delta$  8.71 (d,  $J = 4.3$  Hz, 1H), 7.67 (t,  $J = 7.2$  Hz, 1H), 7.60 (d,  $J = 8.1$  Hz, 1H), 7.42 (d,  $J = 7.4$  Hz, 1H), 7.26-7.23 (m, 2H), 7.17 (t,  $J = 7.5$  Hz, 1H), 7.00 (dd,  $J = 8.7, 2.1$  Hz, 2H), 6.79 (d,  $J = 8.4$  Hz, 2H), 3.80 (dd,  $J = 28.9, 13.0$  Hz, 2H), 1.57 (s, 9H).  $^{13}\text{C}$  NMR (151 MHz,  $\text{CDCl}_3$ )  $\delta$  175.7, 158.2, 149.4, 148.6, 139.7, 137.0, 133.7, 132.7, 131.4, 129.9, 128.6, 127.8, 125.0, 124.4, 122.7, 121.9, 114.9, 84.3, 61.1, 43.3, 28.0. HRMS (ESI)  $m/z$ :  $[\text{M}+\text{H}]^+$  calcd. for  $\text{C}_{25}\text{H}_{24}\text{ClN}_2\text{O}_3$ , 435.1475, found: 435.1463.

**Tert-butyl 3-(3-methylbenzyl)-2-oxo-3-(pyridin-2-yl)indoline-1-carboxylate (3fa).** Yellow oil, 90% yield.  $^1\text{H}$  NMR (600 MHz,  $\text{CDCl}_3$ )  $\delta$  8.70 (d,  $J = 4.2$  Hz, 1H), 7.65 (d,  $J = 1.1$  Hz, 1H), 7.59 (d,  $J = 8.1$  Hz, 1H), 7.38 (d,  $J = 7.3$  Hz, 1H), 7.29 (d,  $J = 8.0$  Hz, 1H), 7.22 (ddd,  $J = 9.1, 6.5, 1.6$  Hz, 2H), 7.16 (d,  $J = 7.5$  Hz, 1H), 6.92-6.87 (m, 2H), 6.67 (s, 1H), 6.63 (d,  $J = 7.3$  Hz, 1H), 3.77 (s, 2H), 2.13 (s, 3H), 1.55 (s, 9H).  $^{13}\text{C}$  NMR (151 MHz,  $\text{CDCl}_3$ )  $\delta$  175.8, 158.5, 149.3, 148.8, 139.8, 137.1, 137.0, 134.9, 130.8, 130.3, 128.4,

127.5, 127.4, 127.1, 125.1, 124.2, 122.6, 122.1, 114.7, 84.0, 61.2, 44.1, 28.0, 21.2. HRMS (ESI)  $m/z$ :  $[M+H]^+$  calcd. for  $C_{26}H_{27}N_2O_3$ , 415.2022, found: 415.2004.

**Tert-butyl 3-(3-bromobenzyl)-2-oxo-3-(pyridin-2-yl)indoline-1-carboxylate (3ga).** Yellow oil, 83% yield.  $^1H$  NMR (600 MHz, DMSO)  $\delta$  8.54 (d,  $J = 3.4$  Hz, 1H), 7.85 (t,  $J = 7.4$  Hz, 1H), 7.50 (dd,  $J = 13.7, 8.1$  Hz, 2H), 7.35 (d,  $J = 6.5$  Hz, 2H), 7.29-7.23 (m, 2H), 7.16 (t,  $J = 7.3$  Hz, 1H), 7.02-6.97 (m, 2H), 6.77 (d,  $J = 7.4$  Hz, 1H), 3.83 (d,  $J = 12.8$  Hz, 1H), 3.66 (d,  $J = 12.8$  Hz, 1H), 1.51 (s, 9H).  $^{13}C$  NMR (151 MHz, DMSO)  $\delta$  175.6, 159.5, 149.7, 148.6, 139.7, 138.4, 137.9, 132.8, 130.9, 130.1, 130.0, 129.3, 128.9, 125.2, 124.9, 123.4, 121.9, 121.3, 114.6, 84.2, 61.5, 41.4, 28.0. HRMS (ESI)  $m/z$ :  $[M+Na]^+$  calcd. for  $C_{25}H_{23}BrN_2NaO_3$ , 501.0790, found: 501.0774.

**Tert-butyl 3-(3-fluorobenzyl)-2-oxo-3-(pyridin-2-yl)indoline-1-carboxylate (3ha).** Yellow oil, 78% yield.  $^1H$  NMR (600 MHz,  $CDCl_3$ )  $\delta$  8.69 (dd,  $J = 2.9, 1.8$  Hz, 1H), 7.65-7.61 (m, 2H), 7.38-7.35 (m, 1H), 7.23 (ddd,  $J = 6.4, 5.9, 1.0$  Hz, 3H), 7.16 (td,  $J = 7.5, 1.0$  Hz, 1H), 6.98 (td,  $J = 7.9, 6.1$  Hz, 1H), 6.79-6.76 (m, 1H), 6.63-6.58 (m, 2H), 3.82-3.76 (m, 2H), 1.56 (s, 9H).  $^{13}C$  NMR (151 MHz,  $CDCl_3$ )  $\delta$  175.6, 163.0, 161.3, 158.1, 149.4, 148.7, 139.7, 137.8, 137.7, 137.0, 129.9, 129.0, 129.0, 128.7, 125.9, 125.9, 124.9, 124.4, 122.7, 122.0, 117.0, 116.8, 114.8, 113.7, 113.6, 84.3, 61.0, 43.6, 28.0. HRMS (ESI)  $m/z$ :  $[M+H]^+$  calcd. for  $C_{25}H_{24}FN_2O_3$ , 419.1771, found: 419.1765.

**Tert-butyl 3-(3-cyanobenzyl)-2-oxo-3-(pyridin-2-yl)indoline-1-carboxylate (3ia).** Yellow oil, 84% yield.  $^1H$  NMR (600 MHz,  $CDCl_3$ )  $\delta$  8.68 (ddd,  $J = 4.8, 1.7, 0.8$  Hz, 1H), 7.64-7.59 (m, 2H), 7.38 (ddd,  $J = 7.5, 3.7, 1.1$  Hz, 2H), 7.26-7.21 (m, 2H), 7.19-7.16 (m, 2H), 7.14 (dd,  $J = 10.0, 4.9$  Hz, 2H), 7.10 (dd,  $J = 5.3, 3.9$  Hz, 1H), 3.83 (dd,  $J = 30.7, 13.1$  Hz, 2H), 1.57 (s, 9H).  $^{13}C$  NMR (151 MHz,  $CDCl_3$ )  $\delta$  175.3, 157.7, 149.5, 148.6, 139.5, 137.1, 136.9, 134.7, 133.5, 130.6, 129.4, 129.0, 128.5, 124.9, 124.7, 122.8, 122.0, 118.6, 114.9, 111.8, 84.6, 60.9, 43.4, 28.0. HRMS (ESI)  $m/z$ :  $[M+H]^+$  calcd. for  $C_{26}H_{24}N_3O_3$ , 426.1818, found: 426.1812.

**Tert-butyl 3-(2-bromobenzyl)-2-oxo-3-(pyridin-2-yl)indoline-1-carboxylate (3ja).** Yellow oil, 90% yield.  $^1H$  NMR (600 MHz,  $CDCl_3$ )  $\delta$  8.74 (d,  $J = 4.0$  Hz, 1H), 7.68 (d,  $J = 8.1$  Hz, 1H), 7.64 (td,  $J = 7.8, 1.8$  Hz, 1H), 7.35 (dd,  $J = 7.9, 1.1$  Hz, 1H), 7.28 (d,  $J = 7.5$  Hz, 1H), 7.26-7.22 (m, 3H), 7.07 (td,  $J = 7.6, 0.9$  Hz, 1H), 7.04 (dd,  $J = 7.7, 1.8$  Hz, 1H), 7.01 (td,  $J = 7.5, 1.2$  Hz, 1H), 6.95 (td,  $J = 7.6, 1.8$  Hz, 1H), 4.28 (d,  $J = 13.8$  Hz, 1H), 3.98 (d,  $J = 13.8$  Hz, 1H), 1.61 (s, 9H).  $^{13}C$  NMR (151 MHz,  $CDCl_3$ )  $\delta$  175.7, 157.9, 149.2, 149.0, 139.5, 137.2, 135.5, 132.8, 130.9, 129.2, 128.7, 128.4, 126.8, 126.3, 126.2, 124.1,

122.7, 122.3, 114.5, 84.3, 60.4, 41.9, 28.1. HRMS (ESI)  $m/z$ :  $[M+H]^+$  calcd. for  $C_{25}H_{24}BrN_2O_3$ , 479.0970, found: 479.0958.

**Tert-butyl 2-oxo-3-(pyridin-2-yl)-3-(thiophen-2-ylmethyl) indoline-1-carboxylate (3ka).** Yellow oil, 90% yield.  $^1H$  NMR (600 MHz, DMSO)  $\delta$  8.55 (d,  $J = 4.1$  Hz, 1H), 7.83 (dd,  $J = 11.0, 4.4$  Hz, 1H), 7.61 (d,  $J = 8.4$  Hz, 1H), 7.43 (d,  $J = 8.0$  Hz, 1H), 7.34 (dd,  $J = 7.1, 5.0$  Hz, 1H), 7.31-7.28 (m, 2H), 7.19-7.14 (m, 2H), 6.78-6.75 (m, 1H), 6.59 (d,  $J = 2.8$  Hz, 1H), 4.08 (d,  $J = 14.2$  Hz, 1H), 3.91 (d,  $J = 14.3$  Hz, 1H), 1.52 (s, 9H).  $^{13}C$  NMR (151 MHz, DMSO)  $\delta$  175.5, 159.2, 149.7, 148.7, 140.1, 138.0, 137.3, 131.1, 129.1, 127.9, 126.7, 125.8, 125.1, 125.0, 123.4, 121.8, 114.9, 84.2, 61.2, 36.3, 28.1. HRMS (ESI)  $m/z$ :  $[M+H]^+$  calcd. for  $C_{23}H_{23}N_2O_3S$ , 407.1429, found: 407.1416.

**Tert-butyl 3-methyl-2-oxo-3-(pyridin-2-yl)indoline-1-carboxylate (3la).** Yellow oil, 91% yield.  $^1H$  NMR (600 MHz,  $CDCl_3$ )  $\delta$  8.59 (d,  $J = 4.0$  Hz, 1H), 7.92 (d,  $J = 8.1$  Hz, 1H), 7.64 (td,  $J = 7.8, 1.7$  Hz, 1H), 7.33-7.30 (m, 1H), 7.23 (d,  $J = 7.2$  Hz, 1H), 7.18 (dd,  $J = 7.1, 5.1$  Hz, 1H), 7.14 (td,  $J = 7.5, 0.9$  Hz, 1H), 1.93 (s, 3H), 1.66 (s, 9H).  $^{13}C$  NMR (151 MHz,  $CDCl_3$ )  $\delta$  177.2, 159.5, 149.5, 149.4, 139.1, 136.9, 133.4, 128.3, 124.7, 124.0, 122.4, 121.0, 115.2, 84.4, 55.3, 28.1, 23.7. HRMS (ESI)  $m/z$ :  $[M+H]^+$  calcd. for  $C_{19}H_{21}N_2O_3$ , 325.1552, found: 325.1537.

**3-Benzyl-3-(pyridin-2-yl)indolin-2-one (3ma).** White solid, 52% yield, m.p. = 191.5-192.5 °C.  $^1H$  NMR (600 MHz,  $CDCl_3$ )  $\delta$  8.71 (d,  $J = 4.1$  Hz, 1H), 7.88 (s, 1H), 7.66 (t,  $J = 7.1$  Hz, 1H), 7.46 (d,  $J = 7.3$  Hz, 1H), 7.32 (d,  $J = 8.0$  Hz, 1H), 7.24 (d,  $J = 7.0$  Hz, 1H), 7.16-7.13 (m, 1H), 7.07-7.04 (m, 2H), 7.04-7.01 (m, 2H), 6.94-6.93 (m, 2H), 6.68 (d,  $J = 7.7$  Hz, 1H), 3.87 (d,  $J = 13.1$  Hz, 1H), 3.74 (d,  $J = 13.1$  Hz, 1H).  $^{13}C$  NMR (151 MHz,  $CDCl_3$ )  $\delta$  179.3, 158.7, 149.5, 140.6, 136.9, 135.8, 131.9, 130.2, 128.2, 127.6, 126.5, 125.6, 122.4, 121.5, 109.7, 61.3, 42.7. HRMS (ESI)  $m/z$ :  $[M+H]^+$  calcd. for  $C_{20}H_{17}N_2O$ , 301.1341, found: 301.1323.

**3-benzyl-1-methyl-3-(pyridin-2-yl)indolin-2-one (3na).** White solid, 78% yield.  $^1H$  NMR (600 MHz,  $CDCl_3$ )  $\delta$  8.71 (d,  $J = 3.4$  Hz, 1H), 7.65 (s, 1H), 7.50 (s, 1H), 7.33 (d,  $J = 7.9$  Hz, 1H), 7.23 (s, 1H), 7.19 (td,  $J = 7.7, 1.2$  Hz, 1H), 7.07-7.03 (m, 2H), 7.02-6.99 (m, 2H), 6.87 (d,  $J = 6.9$  Hz, 2H), 6.58 (d,  $J = 7.7$  Hz, 1H), 3.85 (d,  $J = 12.5$  Hz, 1H), 3.71 (d,  $J = 12.9$  Hz, 1H), 2.97 (s, 3H).  $^{13}C$  NMR (151 MHz, DMSO)  $\delta$  176.9, 159.7, 149.6, 143.9, 137.7, 136.3, 131.8, 130.2, 128.5, 127.8, 126.9, 125.1, 123.0, 122.5, 121.8, 108.7, 61.0, 41.7, 39.6, 26.3. HRMS (ESI)  $m/z$ :  $[M+H]^+$  calcd. for  $C_{21}H_{19}N_2O$ , 315.1497, found: 315.1481.

**1,3-dibenzyl-3-(pyridin-2-yl)indolin-2-one (3oa).** White solid, 70% yield. m.p. = 141.7-142.5 °C. <sup>1</sup>H NMR (600 MHz, CDCl<sub>3</sub>) δ 8.70 (d, *J* = 4.1 Hz, 1H), 7.66 (t, *J* = 7.3 Hz, 1H), 7.58 (d, *J* = 5.9 Hz, 1H), 7.33 (d, *J* = 7.9 Hz, 1H), 7.24-7.21 (m, 1H), 7.15 (ddt, *J* = 12.4, 7.1, 4.0 Hz, 4H), 7.06 (ddd, *J* = 6.8, 3.7, 1.5 Hz, 4H), 6.97-6.95 (m, 2H), 6.67 (d, *J* = 6.8 Hz, 2H), 6.41 – 6.39 (m, 1H), 4.96 (d, *J* = 16.0 Hz, 1H), 4.59 (d, *J* = 16.0 Hz, 1H), 3.94 (d, *J* = 13.0 Hz, 1H), 3.81 (d, *J* = 13.0 Hz, 1H). <sup>13</sup>C NMR (151 MHz, CDCl<sub>3</sub>) δ 176.9, 159.2, 149.4, 142.7, 137.1, 135.9, 135.2, 131.3, 130.5, 128.6, 128.2, 127.8, 127.1, 126.7, 126.6, 125.3, 122.5, 122.4, 121.4, 109.3, 61.0, 43.7, 42.8. HRMS (ESI) *m/z*: [M+H]<sup>+</sup> calcd. for C<sub>27</sub>H<sub>23</sub>N<sub>2</sub>O, 391.1810, found: 391.1792.

**Tert-butyl 3-benzyl-5-bromo-2-oxo-3-(pyridin-2-yl)indoline-1-carboxylate (3pa).** Yellow oil, 90% yield. <sup>1</sup>H NMR (600 MHz, CDCl<sub>3</sub>) δ 8.70 (d, *J* = 4.1 Hz, 1H), 7.68 (dd, *J* = 7.8, 1.6 Hz, 1H), 7.55 (d, *J* = 2.0 Hz, 1H), 7.48 (d, *J* = 8.7 Hz, 1H), 7.34 (dd, *J* = 8.7, 2.0 Hz, 2H), 7.27 (d, *J* = 5.4 Hz, 1H), 7.08 (dt, *J* = 14.5, 7.0 Hz, 3H), 6.86 (d, *J* = 7.0 Hz, 2H), 3.77 (d, *J* = 3.4 Hz, 2H), 1.54 (s, 9H). <sup>13</sup>C NMR (151 MHz, CDCl<sub>3</sub>) δ 175.0, 157.7, 149.5, 148.5, 138.7, 137.3, 134.6, 132.3, 131.4, 130.0, 128.1, 127.8, 127.0, 122.9, 121.9, 117.2, 116.4, 84.4, 61.1, 44.5, 28.0. HRMS (ESI) *m/z*: [M+H]<sup>+</sup> calcd. for C<sub>25</sub>H<sub>24</sub>BrN<sub>2</sub>O<sub>3</sub>, 479.0970, found: 479.0955.

**Tert-butyl 3-benzyl-5-chloro-2-oxo-3-(pyridin-2-yl)indoline-1-carboxylate (3qa).** Yellow oil, 88% yield. <sup>1</sup>H NMR (600 MHz, CDCl<sub>3</sub>) δ 8.68 (dd, *J* = 4.8, 0.9 Hz, 1H), 7.67 (td, *J* = 7.8, 1.8 Hz, 1H), 7.53 (d, *J* = 8.7 Hz, 1H), 7.40 (d, *J* = 2.2 Hz, 1H), 7.33 (d, *J* = 8.0 Hz, 1H), 7.24 (ddd, *J* = 7.5, 4.9, 0.8 Hz, 1H), 7.18 (dd, *J* = 8.7, 2.3 Hz, 1H), 7.09 (dd, *J* = 4.9, 3.6 Hz, 1H), 7.08-7.05 (m, 2H), 6.88-6.85 (m, 2H), 3.76 (s, 2H), 1.54 (s, 9H). <sup>13</sup>C NMR (151 MHz, CDCl<sub>3</sub>) δ 175.2, 157.8, 149.6, 148.5, 138.2, 137.1, 134.7, 132.1, 130.0, 129.7, 128.4, 127.8, 127.0, 125.3, 122.8, 121.8, 116.0, 84.4, 61.2, 44.5, 28.0. HRMS (ESI) *m/z*: [M+H]<sup>+</sup> calcd. for C<sub>25</sub>H<sub>24</sub>ClN<sub>2</sub>O<sub>3</sub>, 435.1475, found: 435.1459.

**Tert-butyl 3-benzyl-6-chloro-2-oxo-3-(pyridin-2-yl)indoline-1-carboxylate (3ra).** Yellow oil, 86% yield. <sup>1</sup>H NMR (600 MHz, CDCl<sub>3</sub>) δ 8.65 (d, *J* = 4.0 Hz, 1H), 7.65 (ddd, *J* = 9.3, 8.1, 1.6 Hz, 2H), 7.31 (dd, *J* = 8.0, 4.4 Hz, 2H), 7.21 (dd, *J* = 7.0, 5.1 Hz, 1H), 7.14-7.08 (m, 2H), 7.06 (t, *J* = 7.3 Hz, 2H), 6.86 (d, *J* = 7.2 Hz, 2H), 3.78-3.73 (m, 2H), 1.55 (s, 9H). <sup>13</sup>C NMR (151 MHz, CDCl<sub>3</sub>) δ 175.4, 158.0, 149.6, 148.44, 140.5, 137.0, 134.8, 134.1, 130.0, 128.6, 127.80, 126.9, 126.1, 124.3, 122.7, 121.7, 115.5, 84.5, 60.9, 44.2, 28.0. HRMS (ESI) *m/z*: [M+H]<sup>+</sup> calcd. for C<sub>25</sub>H<sub>24</sub>ClN<sub>2</sub>O<sub>3</sub>, 435.1475, found: 435.1460.

**1-(tert-butyl)-6-methyl 3-benzyl-2-oxo-3-(pyridin-2-yl)indoline-1,6-dicarboxylate (3sa)** Yellow oil, 85% yield. <sup>1</sup>H NMR (600 MHz, CDCl<sub>3</sub>) δ 8.68 (d, *J* = 3.9 Hz, 1H), 8.25 (d, *J* = 1.3 Hz, 1H), 7.88 (dd, *J* = 7.9, 1.4 Hz, 1H), 7.68 (t, *J* = 7.1 Hz, 1H), 7.51 (d, *J* = 7.9 Hz, 1H), 7.34 (d, *J* = 7.9 Hz, 1H), 7.26-7.24 (m, 1H), 7.08 (t, *J* = 7.3 Hz, 1H), 7.03 (t, *J* = 7.4 Hz, 2H), 6.85 (d, *J* = 7.1 Hz, 2H), 3.89 (s, 3H), 3.81 (t, *J* = 9.4 Hz, 2H), 1.58 (s, 9H). <sup>13</sup>C NMR (151 MHz, CDCl<sub>3</sub>) δ 175.4, 166.6, 157.7, 149.5, 148.3, 139.8, 137.3, 135.2, 134.6, 130.4, 130.0, 127.8, 127.0, 125.9, 125.2, 122.9, 122.0, 115.9, 84.6, 61.4, 52.3, 44.2, 28.0. HRMS (ESI) *m/z*: [M+H]<sup>+</sup> calcd. for C<sub>27</sub>H<sub>27</sub>N<sub>2</sub>O<sub>5</sub>, 459.1920, found: 459.1904.

**Tert-butyl 3-benzyl-3-(4-methylpyridin-2-yl)-2-oxoindoline-1-carboxylate (3ab)**. Yellow oil, 92% yield. <sup>1</sup>H NMR (600 MHz, CDCl<sub>3</sub>) δ 8.54 (d, *J* = 4.8 Hz, 1H), 7.56 (d, *J* = 7.9 Hz, 1H), 7.40 (d, *J* = 6.4 Hz, 1H), 7.21 (td, *J* = 7.9, 1.4 Hz, 1H), 7.15 (td, *J* = 7.5, 1.0 Hz, 1H), 7.08-7.05 (m, 3H), 7.04-7.01 (m, 2H), 6.86-6.84 (m, 2H), 3.80 (t, *J* = 14.9 Hz, 2H), 2.31 (s, 3H), 1.55 (s, 9H). <sup>13</sup>C NMR (151 MHz, CDCl<sub>3</sub>) δ 176.1, 158.3, 149.0, 148.7, 139.6, 135.2, 130.4, 130.1, 128.3, 127.6, 126.7, 125.0, 124.3, 123.6, 122.8, 114.8, 84.0, 61.1, 44.1, 28.0, 21.2. HRMS (ESI) *m/z*: [M+H]<sup>+</sup> calcd. for C<sub>26</sub>H<sub>27</sub>N<sub>2</sub>O<sub>3</sub>, 415.2022, found: 415.1999.

**Tert-butyl 3-benzyl-3-(4-methoxypyridin-2-yl)-2-oxoindoline-1-carboxylate (3ac)**. Yellow oil, 90% yield. <sup>1</sup>H NMR (600 MHz, CDCl<sub>3</sub>) δ 8.53 (s, 1H), 7.56 (d, *J* = 8.2 Hz, 1H), 7.43 (s, 1H), 7.22 (td, *J* = 7.9, 1.4 Hz, 1H), 7.16 (t, *J* = 7.2 Hz, 1H), 7.08-7.06 (m, 1H), 7.04-7.01 (m, 2H), 6.86-6.82 (m, 3H), 6.78 (s, 1H), 3.82 (s, 3H), 3.77 (d, *J* = 12.7 Hz, 1H), 1.55 (s, 9H). <sup>13</sup>C NMR (151 MHz, CDCl<sub>3</sub>) δ 175.8, 166.3, 160.1, 150.7, 148.7, 139.7, 135.1, 130.2, 130.1, 128.4, 127.6, 126.7, 125.1, 124.2, 114.8, 108.5, 108.4, 84.0, 61.2, 55.3, 44.1, 28.0. HRMS (ESI) *m/z*: [M+H]<sup>+</sup> calcd. for C<sub>26</sub>H<sub>27</sub>N<sub>2</sub>O<sub>4</sub>, 431.1971, found: 431.1958.

**Tert-butyl 3-benzyl-3-(4-(methoxycarbonyl)pyridin-2-yl)-2-oxoindoline-1-carboxylate (3ad)**. White solid, 72% yield. m.p. = 161.9-162.6 °C. <sup>1</sup>H NMR (600 MHz, CDCl<sub>3</sub>) δ 8.84 (dd, *J* = 5.0, 0.5 Hz, 1H), 7.85 (s, 1H), 7.81 (dd, *J* = 5.1, 1.4 Hz, 1H), 7.59 (d, *J* = 8.1 Hz, 1H), 7.34 (dd, *J* = 7.5, 0.9 Hz, 1H), 7.25-7.22 (m, 1H), 7.16 (td, *J* = 7.5, 0.9 Hz, 1H), 7.09 (dd, *J* = 8.3, 6.3 Hz, 1H), 7.03 (dd, *J* = 10.1, 4.7 Hz, 2H), 6.87-6.82 (m, 2H), 3.93 (s, 3H), 3.85-3.80 (m, 2H), 1.55 (s, 9H). <sup>13</sup>C NMR (151 MHz, CDCl<sub>3</sub>) δ 175.6, 165.4, 159.9, 150.2, 148.6, 139.8, 138.4, 134.8, 130.1, 129.9, 128.6, 127.7, 126.8, 124.9, 124.4, 121.8, 121.2, 114.9, 84.1, 61.3, 52.8, 44.2, 28.0. HRMS (ESI) *m/z*: [M+H]<sup>+</sup> calcd. for C<sub>27</sub>H<sub>27</sub>N<sub>2</sub>O<sub>5</sub>, 459.1920, found: 459.1903.

**Tert-butyl 3-benzyl-3-(4-cyanopyridin-2-yl)-2-oxindoline-1-carboxylate (3ae).** Yellow oil, 52% yield. <sup>1</sup>H NMR (600 MHz, CDCl<sub>3</sub>) δ 8.87 (dd, *J* = 5.0, 0.6 Hz, 1H), 7.61 (d, *J* = 8.2 Hz, 1H), 7.56 (s, 1H), 7.46 (dd, *J* = 5.0, 1.3 Hz, 1H), 7.37 (dd, *J* = 7.5, 0.9 Hz, 1H), 7.29-7.26 (m, 1H), 7.20-7.17 (m, 1H), 7.10 (t, *J* = 7.4 Hz, 1H), 7.04 (t, *J* = 7.4 Hz, 2H), 6.83 (d, *J* = 7.2 Hz, 2H), 3.75 (q, *J* = 13.0 Hz, 2H), 1.56 (s, 9H). <sup>13</sup>C NMR (151 MHz, CDCl<sub>3</sub>) δ 175.0, 160.2, 150.5, 148.5, 139.8, 134.4, 130.0, 129.0, 128.9, 127.8, 127.0, 125.1, 124.5, 123.9, 123.7, 121.2, 116.3, 115.0, 84.5, 61.1, 44.5, 28.0. HRMS (ESI) *m/z*: [M+Na]<sup>+</sup> calcd. for C<sub>26</sub>H<sub>23</sub>N<sub>3</sub>NaO<sub>3</sub>, 448.1637, found: 448.1620.

**Tert-butyl 3-benzyl-3-(6-bromopyridin-2-yl)-2-oxindoline-1-carboxylate (3af).** White solid, 62% yield. m.p. = 157.5-158.4 °C. <sup>1</sup>H NMR (600 MHz, CDCl<sub>3</sub>) δ 8.37 (d, *J* = 5.3 Hz, 1H), 7.67 (d, *J* = 8.2 Hz, 1H), 7.60 (s, 1H), 7.43 (dd, *J* = 5.3, 1.2 Hz, 1H), 7.33-7.30 (m, 1H), 7.25-7.23 (m, 1H), 7.16-7.10 (m, 2H), 7.05 (t, *J* = 7.5 Hz, 2H), 6.80 (d, *J* = 7.3 Hz, 2H), 3.69 (d, *J* = 12.9 Hz, 1H), 3.40 (d, *J* = 12.9 Hz, 1H), 1.56 (s, 9H). <sup>13</sup>C NMR (101 MHz, CDCl<sub>3</sub>) δ 174.6, 151.1, 150.3, 148.4, 142.9, 140.0, 133.8, 130.0, 129.3, 127.9, 127.6, 127.3, 127.0, 125.3, 124.5, 121.9, 115.4, 84.7, 58.0, 44.7, 28.0. HRMS (ESI) *m/z*: [M+H]<sup>+</sup> calcd. for C<sub>25</sub>H<sub>24</sub>BrN<sub>2</sub>O<sub>3</sub>, 479.0970, found: 479.0952.

**Tert-butyl 3-benzyl-3-(isoquinolin-1-yl)-2-oxindoline-1-carboxylate (3ag).** White solid, 71% yield. m.p. = 173.3-173.8 °C. <sup>1</sup>H NMR (600 MHz, CDCl<sub>3</sub>) δ 8.67 (d, *J* = 5.7 Hz, 1H), 7.82 (d, *J* = 8.2 Hz, 1H), 7.71 (d, *J* = 5.6 Hz, 1H), 7.61 (d, *J* = 8.2 Hz, 1H), 7.56 (t, *J* = 7.5 Hz, 1H), 7.32 – 7.29 (m, 1H), 7.24 (dd, *J* = 8.2, 1.3 Hz, 1H), 7.20 (d, *J* = 8.6 Hz, 1H), 7.12-7.06 (m, 2H), 7.04-6.99 (m, 3H), 6.76 -6.70 (m, 2H), 4.04 (dd, *J* = 28.7, 12.8 Hz, 2H), 1.54 (s, 9H). <sup>13</sup>C NMR (151 MHz, CDCl<sub>3</sub>) δ 176.3, 156.5, 148.6, 140.8, 139.3, 137.2, 134.8, 131.9, 130.1, 129.7, 128.6, 127.9, 127.4, 126.7, 126.4, 124.8, 124.3, 123.5, 121.6, 115.2, 84.0, 61.3, 46.1, 28.0. HRMS (ESI) *m/z*: [M+H]<sup>+</sup> calcd. for C<sub>29</sub>H<sub>27</sub>N<sub>2</sub>O<sub>3</sub>, 451.2022, found: 451.2004.

### General procedure for the synthetic transformation of **3**.

To the solution of 3-Pyridyl-3,3-disubstituted oxindoles **3** (0.05 mmol, 1.0 equiv.) in CH<sub>2</sub>Cl<sub>2</sub> (1.5 mL) was slowly added CF<sub>3</sub>CO<sub>2</sub>H (0.1 mL) at 0 °C. The resulting mixture was stirred at 0 °C for 1 h, followed by warming to rt. The progress of the reaction was monitored by TLC. Upon completion, the reaction was concentrated at rt., and the residue was dissolved in CH<sub>2</sub>Cl<sub>2</sub> (5.0 mL). Then the mixture was adjusted to pH 10 with saturated aqueous solution of NaHCO<sub>3</sub> and extracted with CH<sub>2</sub>Cl<sub>2</sub> (3 × 5 mL). The combined organic extracts were dried over anhydrous sodium sulfate, filtered, and concentrated under



reduced pressure. The residue was purified by column chromatography (SiO<sub>2</sub>; hexanes/EtOAc, 1:1) to give product **3ma**, **4** or **5**.

**3-benzyl-3-(4-methylpyridin-2-yl)indolin-2-one (4)**. White solid, 93% yield, m.p. = 208.9-209.6 °C. <sup>1</sup>H NMR (600 MHz, CDCl<sub>3</sub>) δ 8.53 (d, *J* = 5.0 Hz, 1H), 7.42 (d, *J* = 7.4 Hz, 1H), 7.13 (td, *J* = 7.7, 1.2 Hz, 1H), 7.04 (ddd, *J* = 13.7, 7.8, 5.5 Hz, 4H), 6.98 (t, *J* = 7.5 Hz, 2H), 6.94-6.91 (m, 2H), 6.70 (d, *J* = 7.7 Hz, 1H), 3.85 (d, *J* = 13.1 Hz, 1H), 3.72 (d, *J* = 13.1 Hz, 1H), 2.26 (s, 3H). <sup>13</sup>C NMR (151 MHz, CDCl<sub>3</sub>) δ 179.6, 158.5, 149.2, 148.2, 140.7, 135.9, 132.1, 130.2, 128.2, 127.6, 126.5, 125.5, 123.4, 122.4, 122.3, 109.7, 61.3, 42.7, 21.16. HRMS (ESI) *m/z*: [M+H]<sup>+</sup> calcd. for C<sub>21</sub>H<sub>19</sub>N<sub>2</sub>O, 315.1497, found: 315.1489.

**3-benzyl-5-chloro-3-(pyridin-2-yl)indolin-2-one (5)**. White solid, 91% yield, m.p. = 229.2-229.8 °C. <sup>1</sup>H NMR (600 MHz, CDCl<sub>3</sub>) δ 8.68 (d, *J* = 4.0 Hz, 1H), 8.44 (s, 1H), 7.66 (td, *J* = 7.8, 1.6 Hz, 1H), 7.44 (d, *J* = 2.0 Hz, 1H), 7.33 (d, *J* = 7.9 Hz, 1H), 7.25 (dd, *J* = 7.4, 5.3 Hz, 1H), 7.11 (dd, *J* = 8.3, 2.1 Hz, 1H), 7.07 (dd, *J* = 8.4, 6.0 Hz, 1H), 7.04 (t, *J* = 7.2 Hz, 2H), 6.94-6.92 (m, 2H), 6.62 (d, *J* = 8.3 Hz, 1H), 3.80 (d, *J* = 13.1 Hz, 1H), 3.70 (d, *J* = 13.1 Hz, 1H). <sup>13</sup>C NMR (151 MHz, CDCl<sub>3</sub>) δ 178.9, 157.9, 149.6, 139.2, 137.3, 135.3, 133.5, 130.2, 128.3, 127.8, 126.8, 126.0, 122.7, 121.5, 110.7, 61.5, 43.1. HRMS (ESI) *m/z*: [M+H]<sup>+</sup> calcd. for C<sub>20</sub>H<sub>16</sub>ClN<sub>2</sub>O, 335.0951, found: 335.0939.

## References

- [1] Wei D. Q.; Liu Z. T.; Wang X. M.; Hou C. J.; Hu X. P. *J. Org. Chem.* **2011**, *76*, 6401-6406.
- [2] Londregan, A. T.; Farley, K. A.; Limberakis, C.; Mullins, P. B.; Piotrowski, D. W. *Org. Lett.*, **2012**, *14*, 2890-2893.

# NMR Spectra

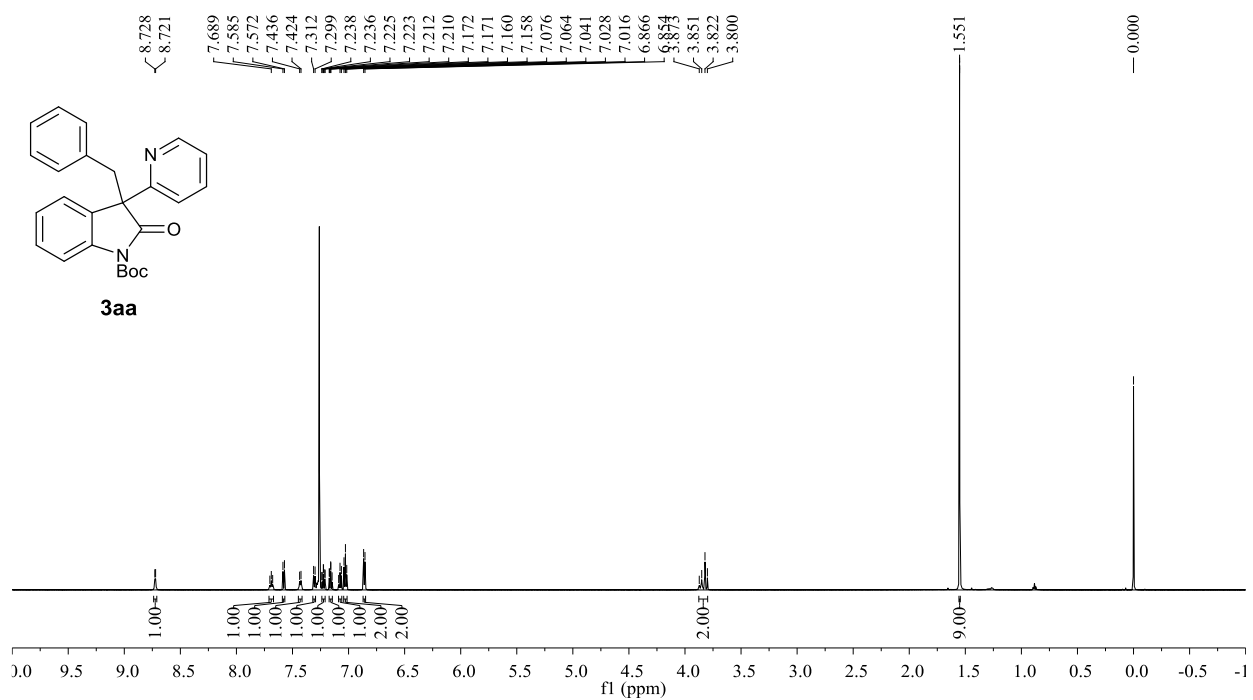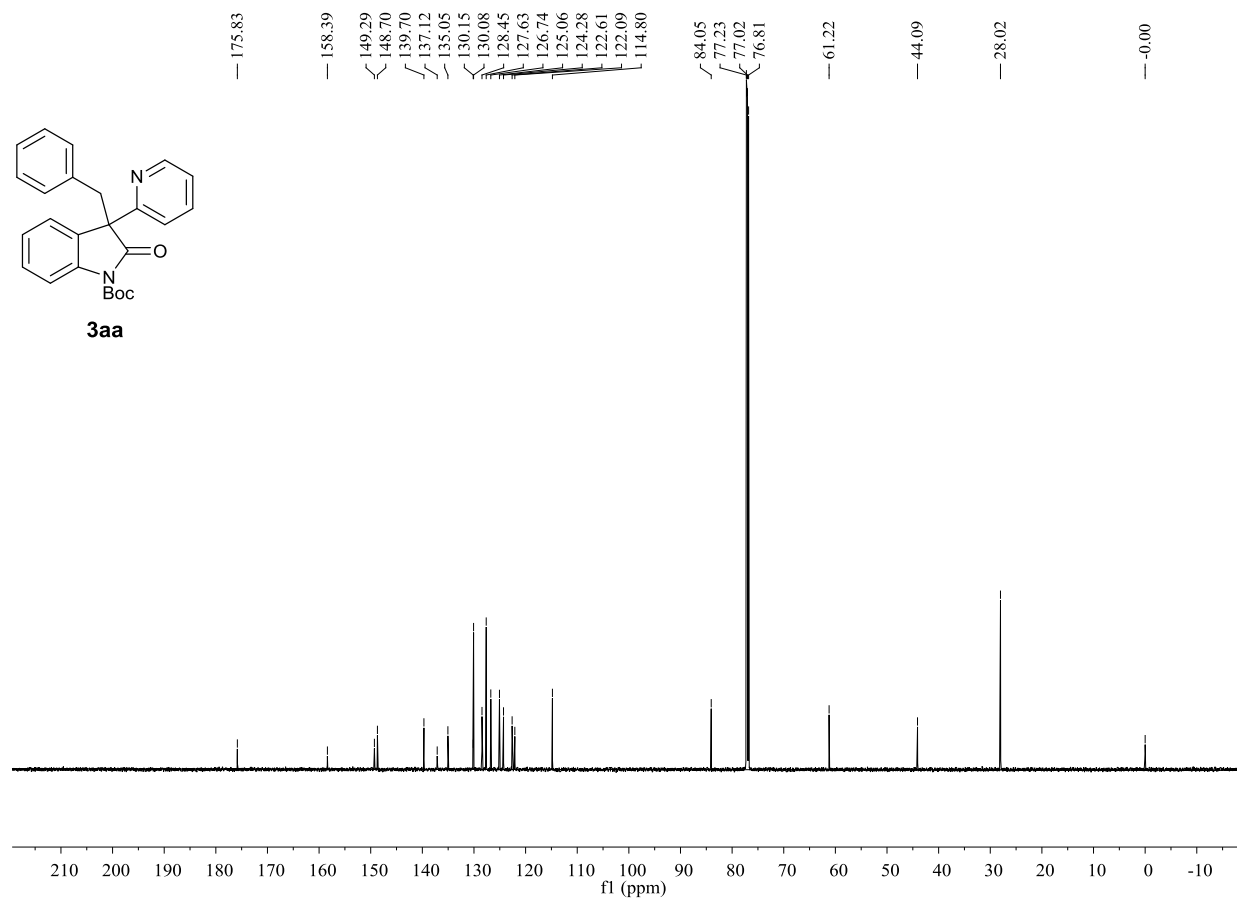



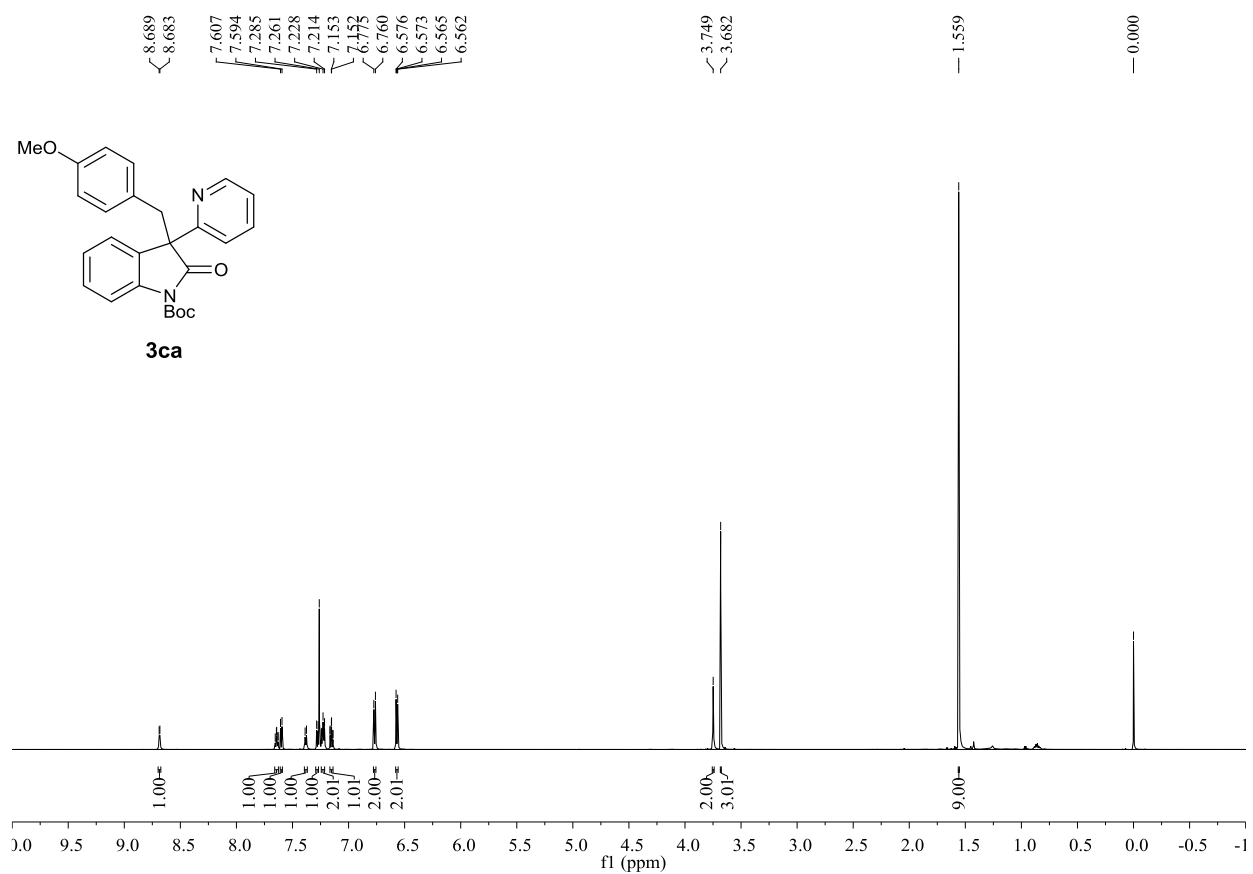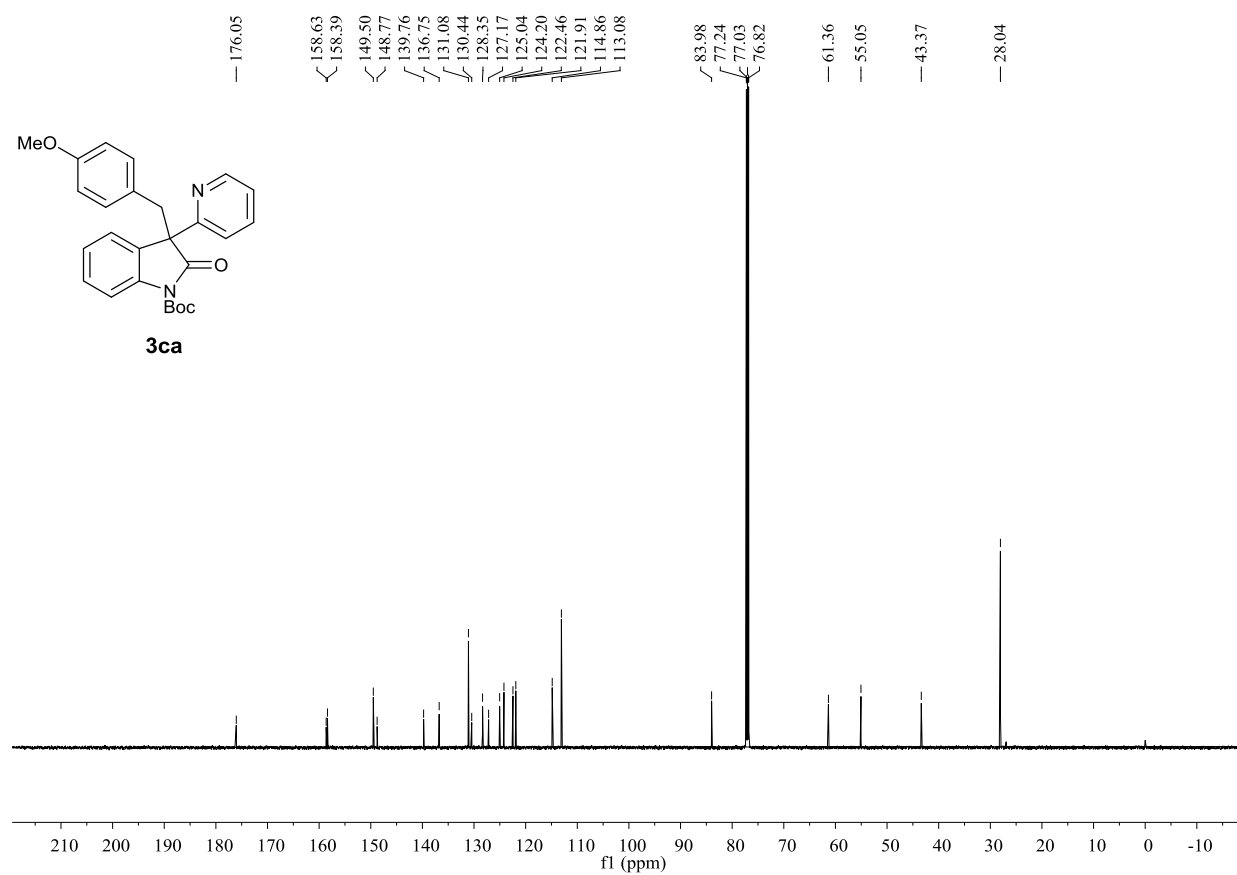

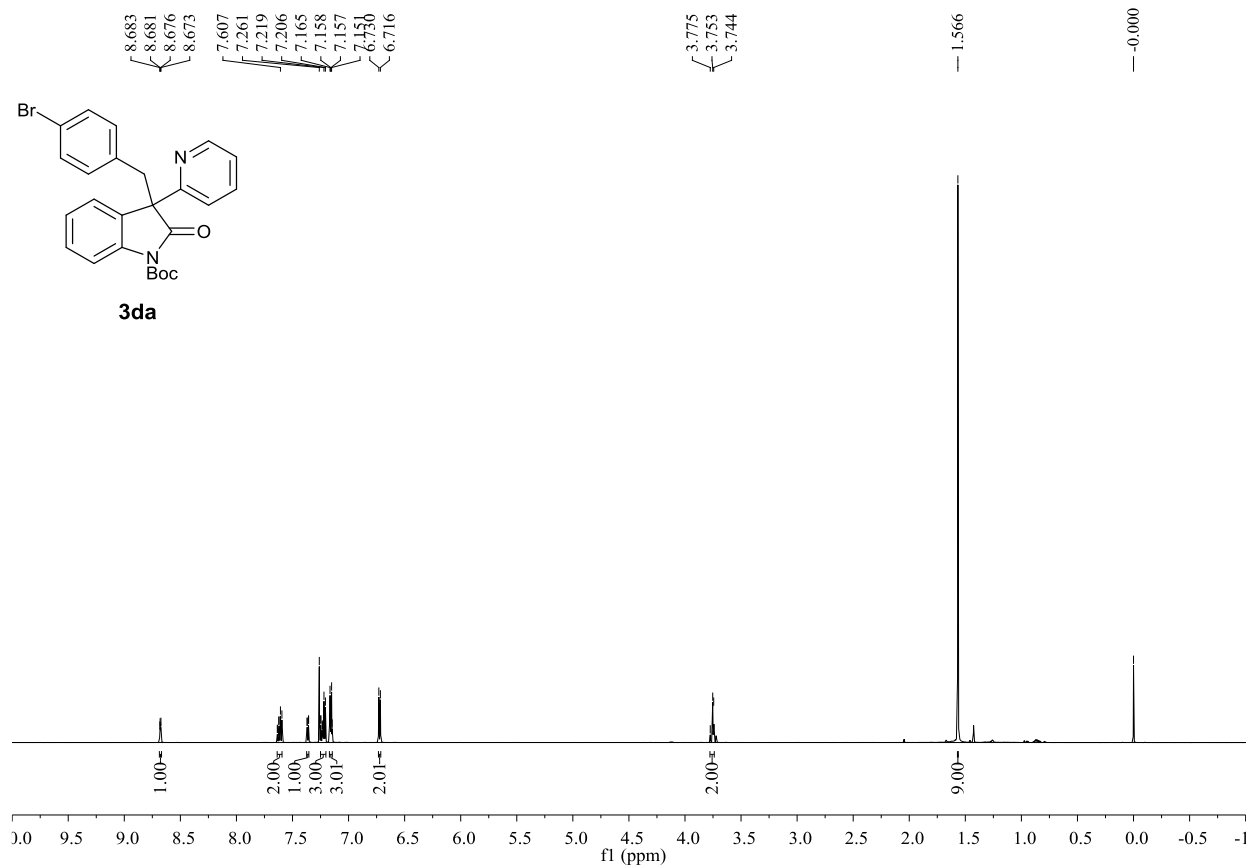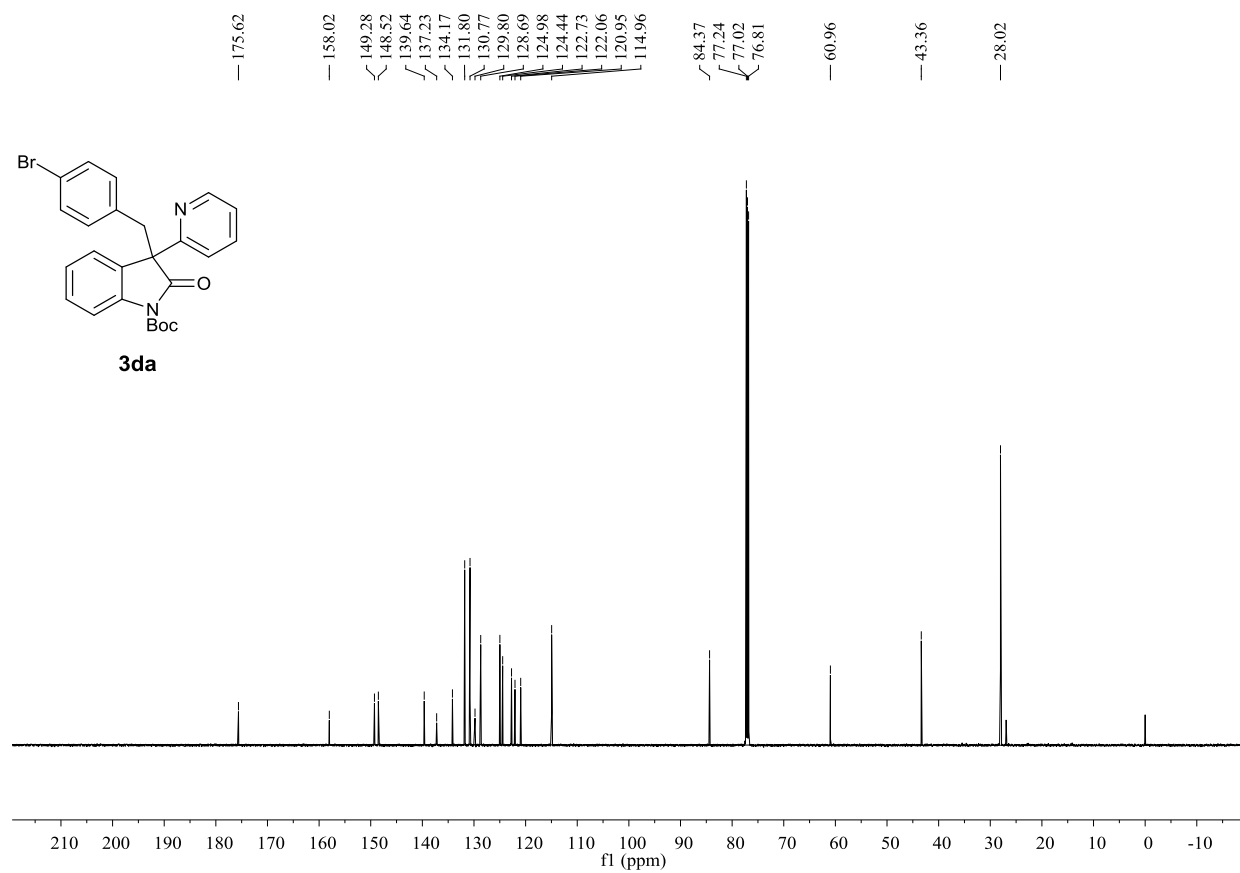

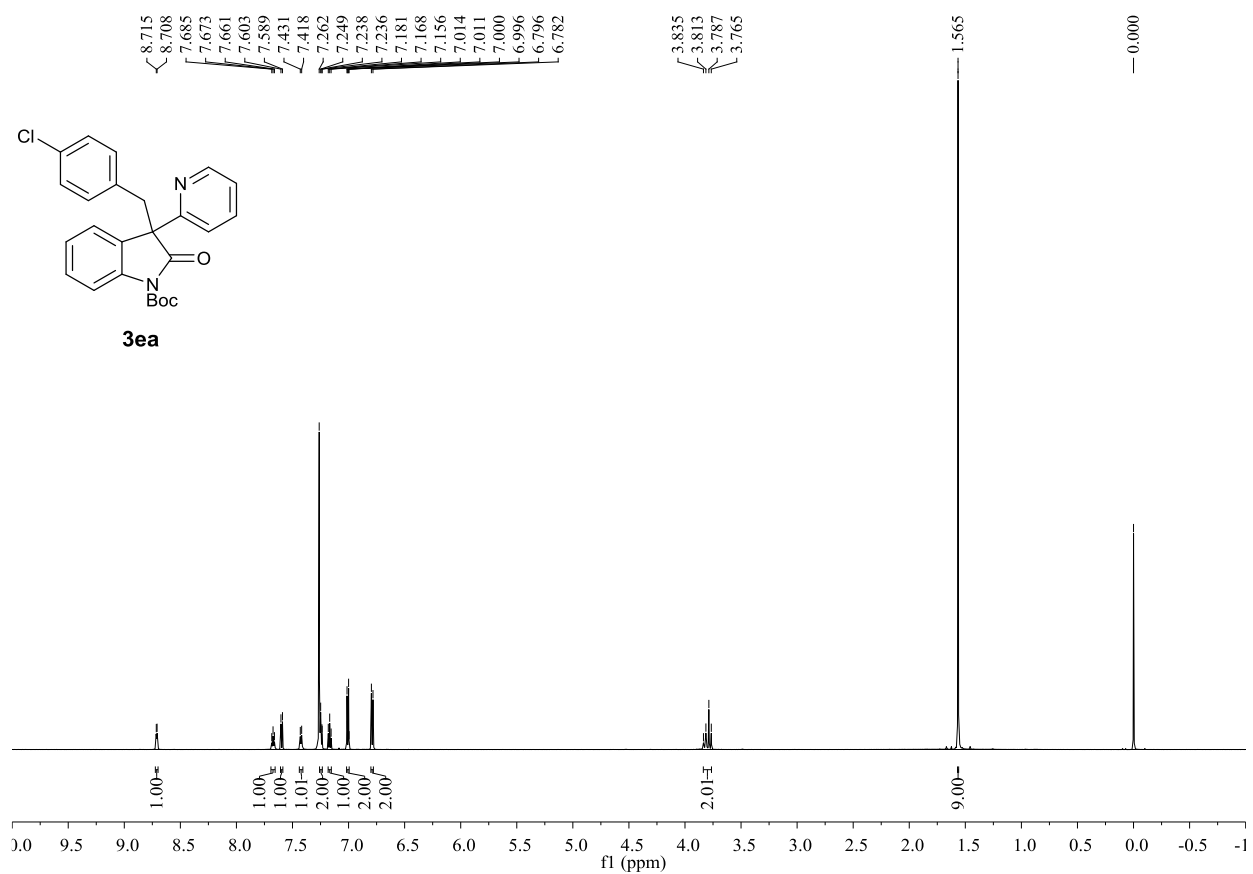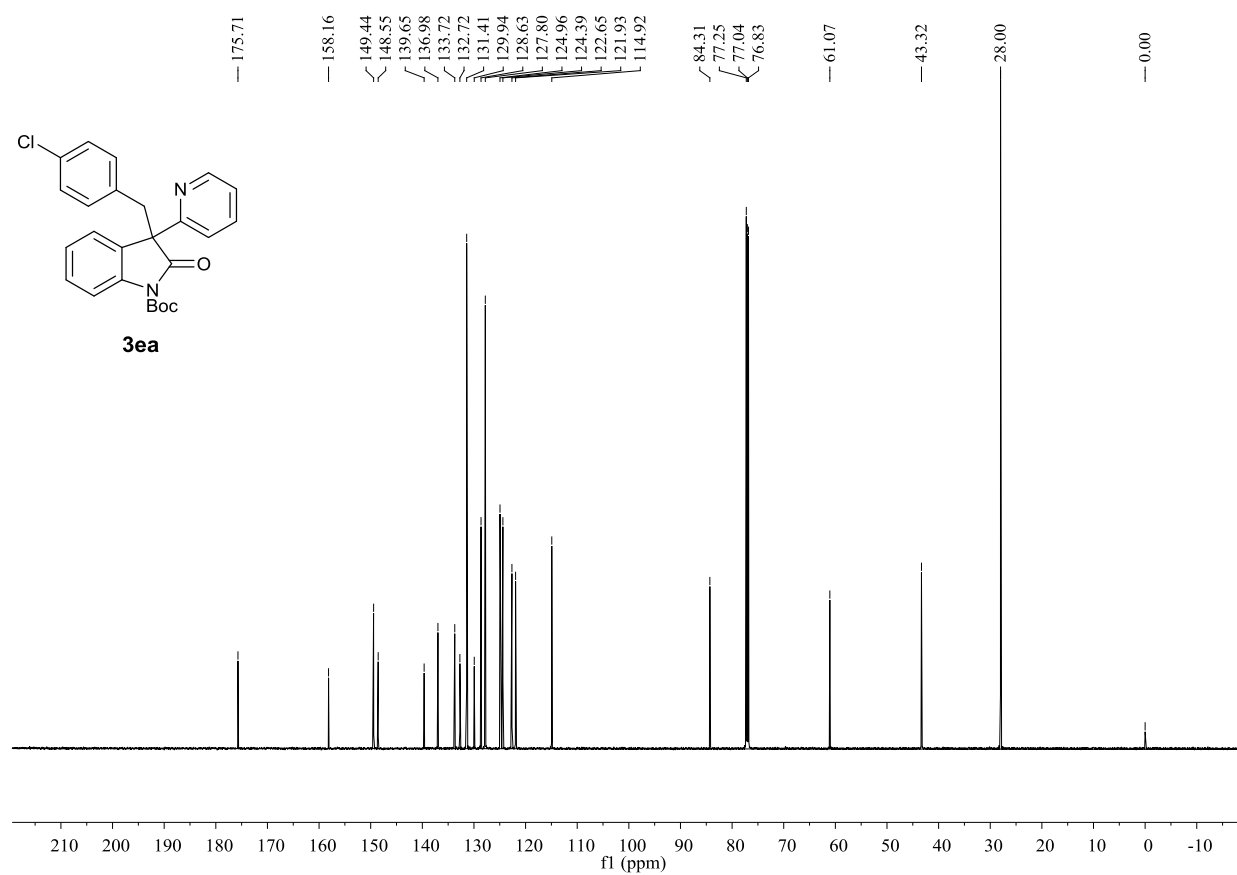

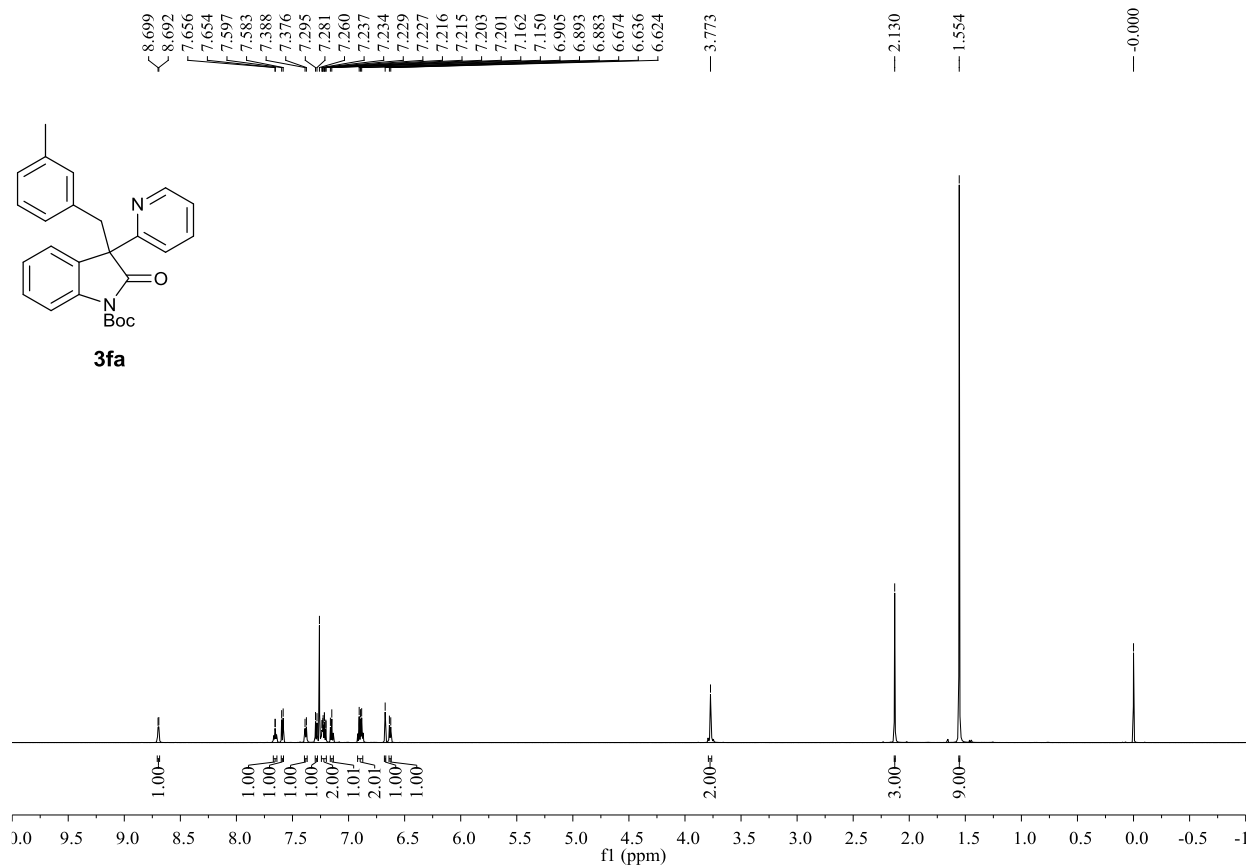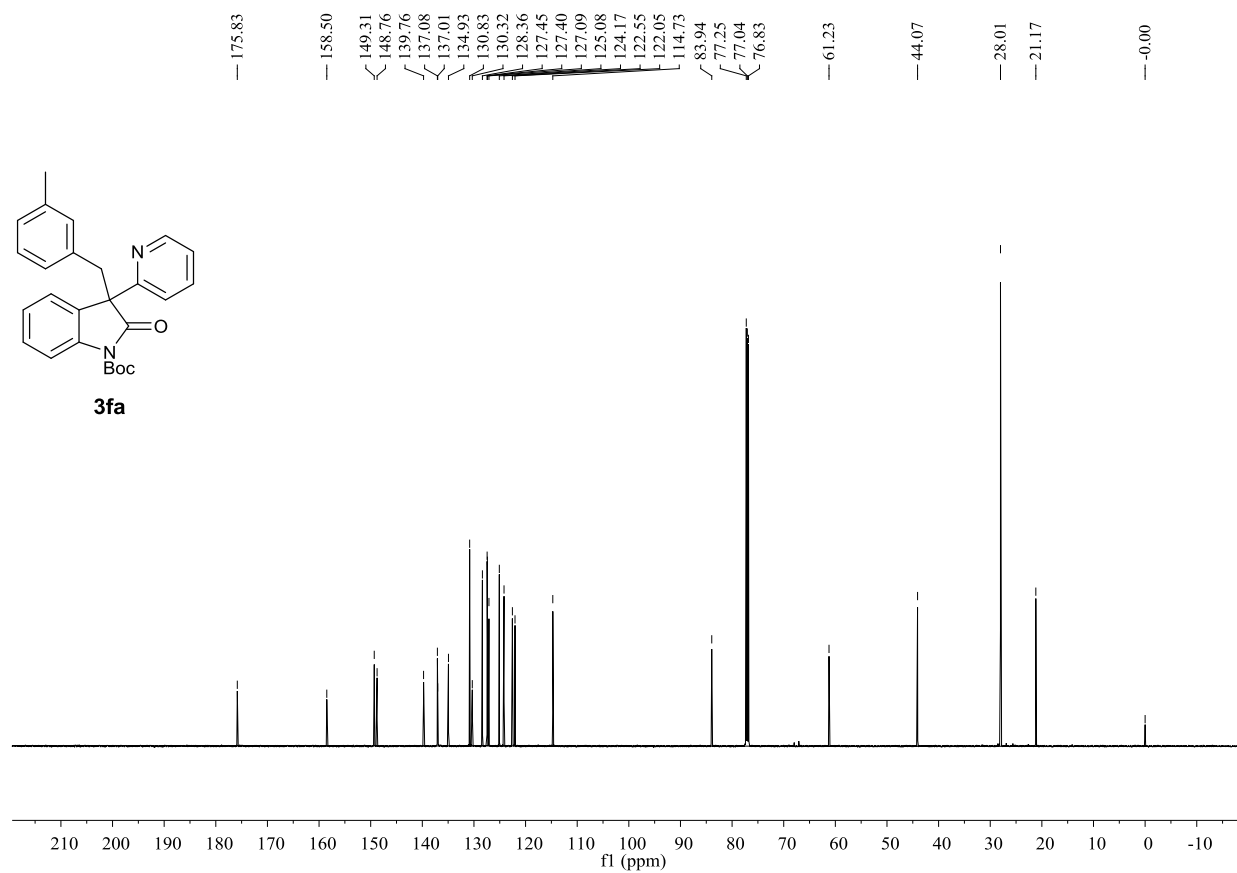

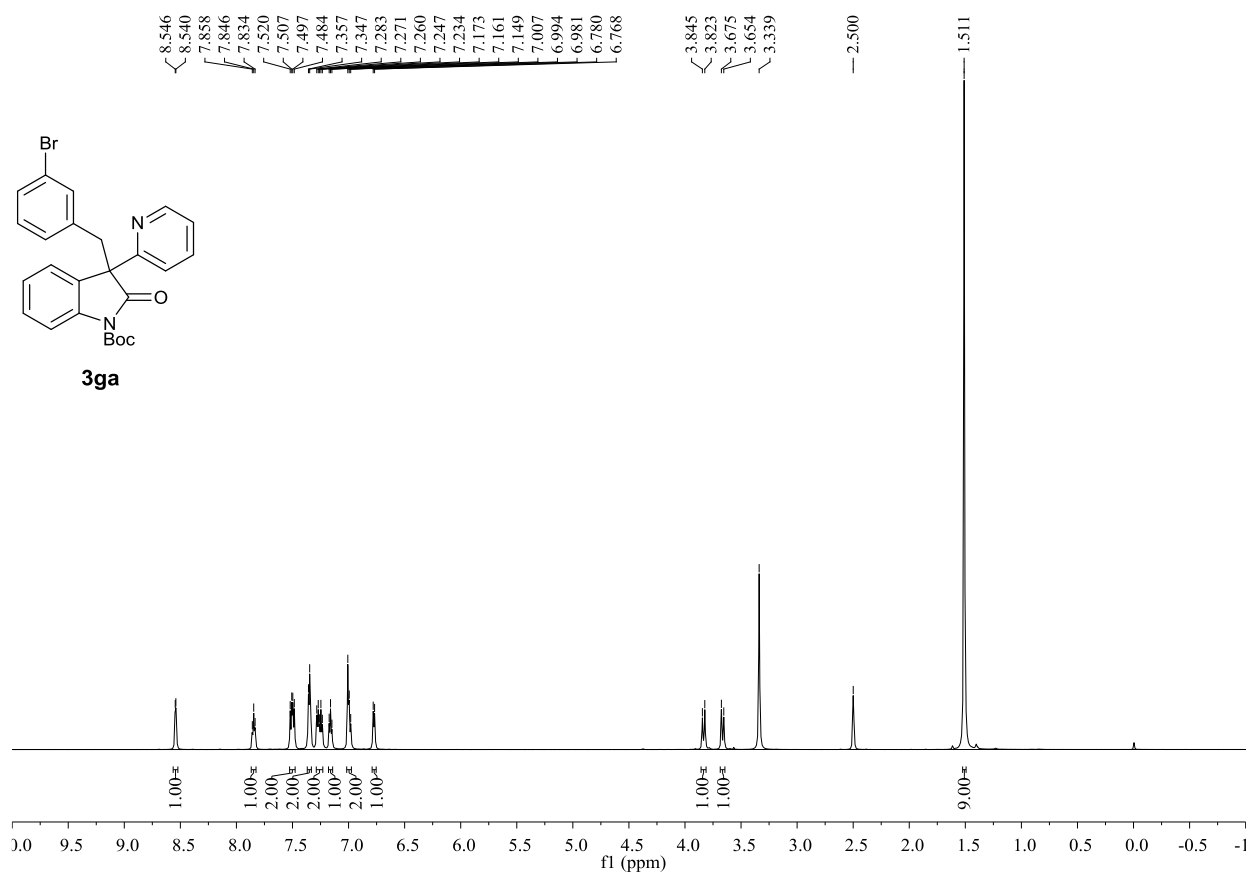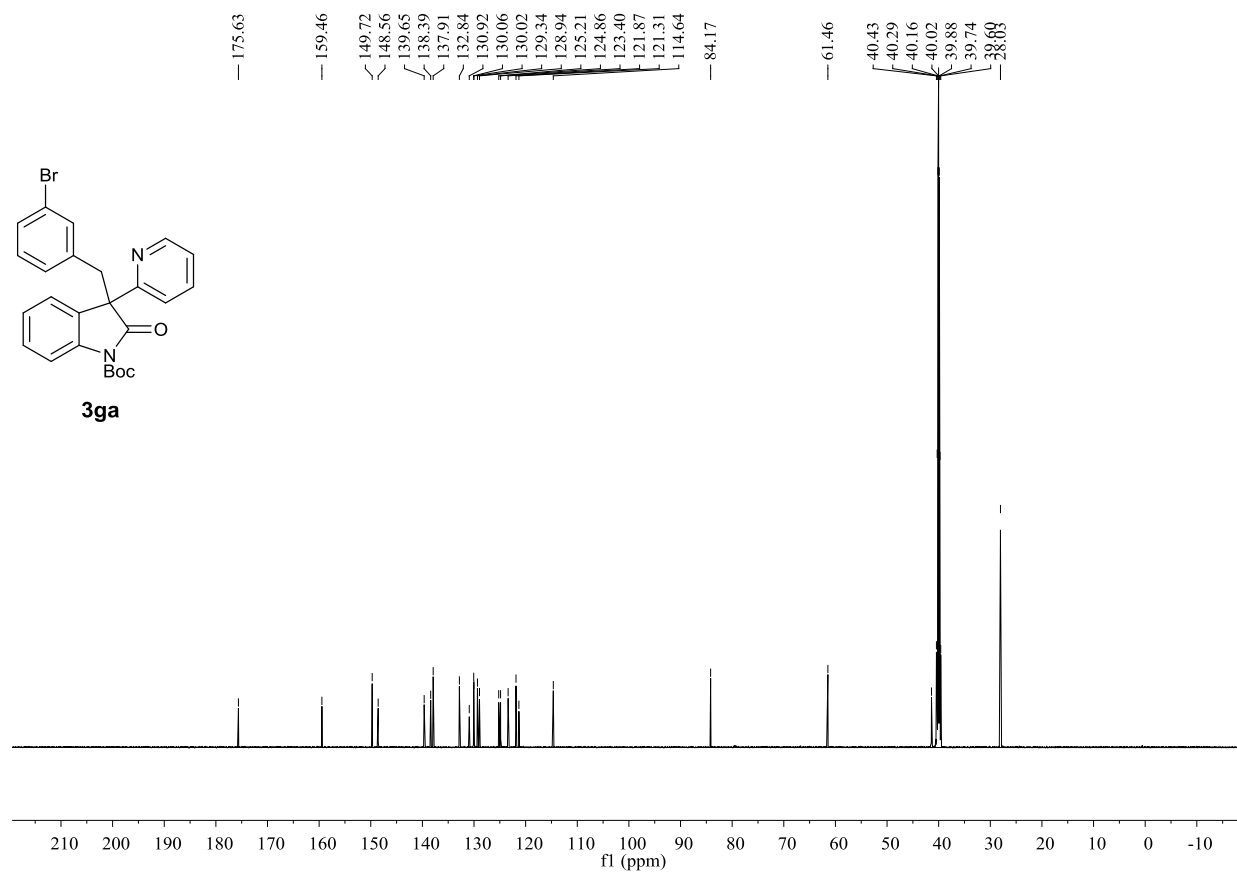



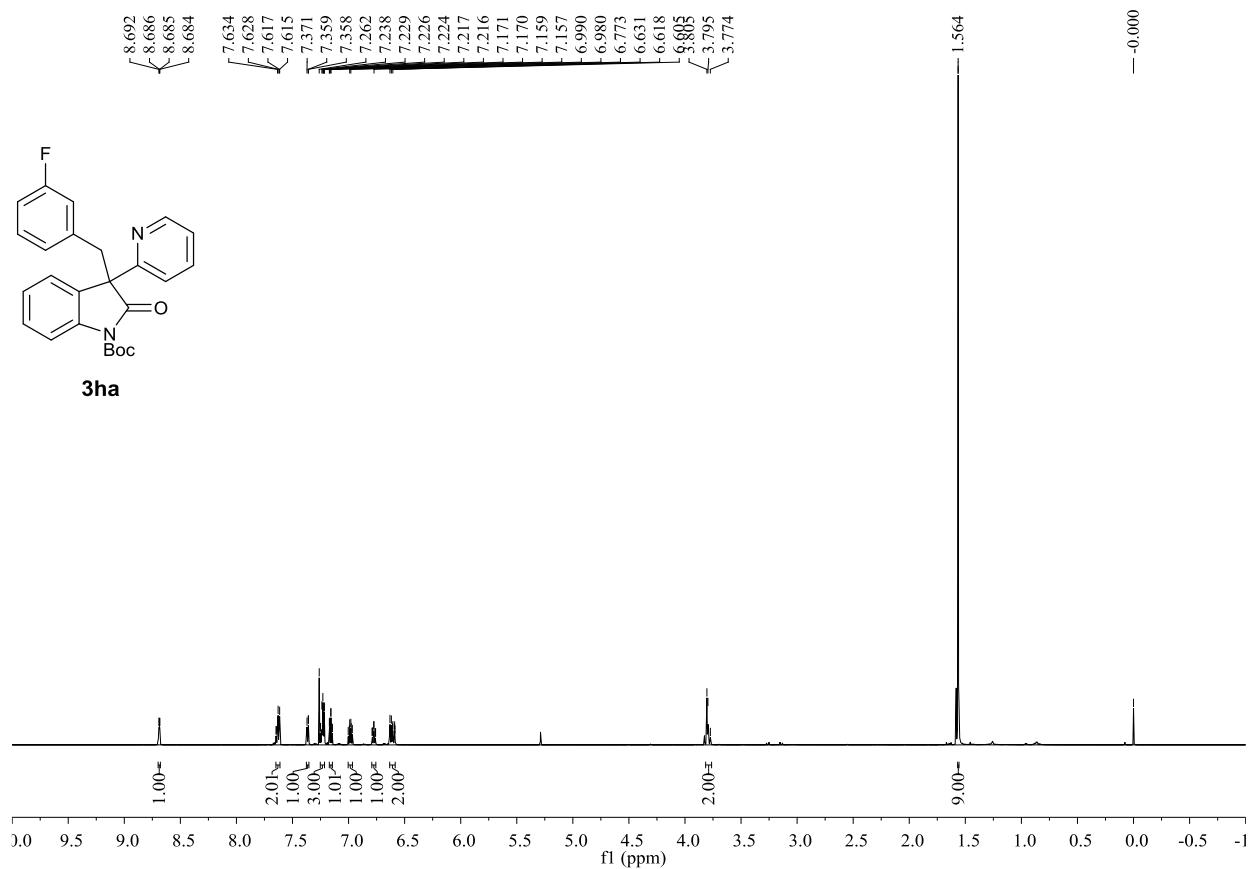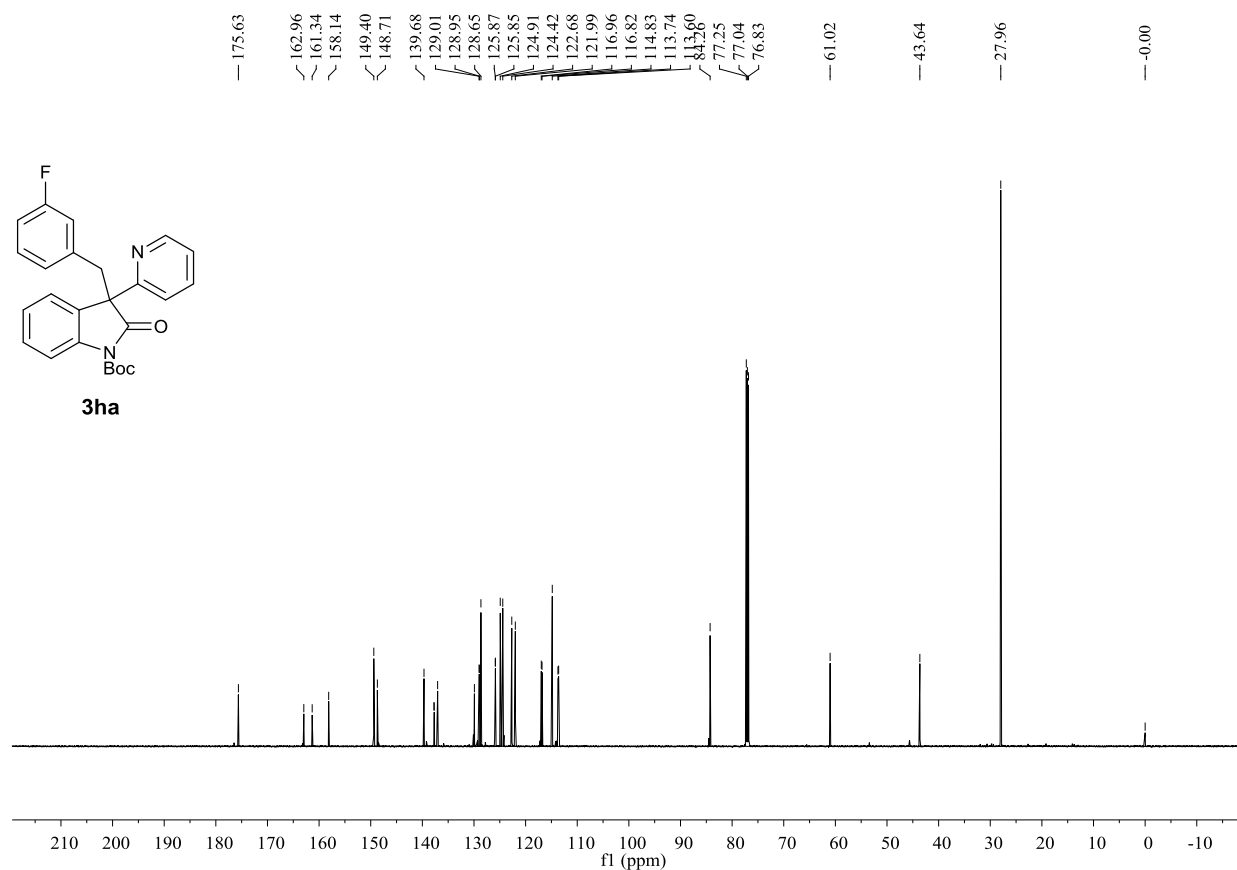

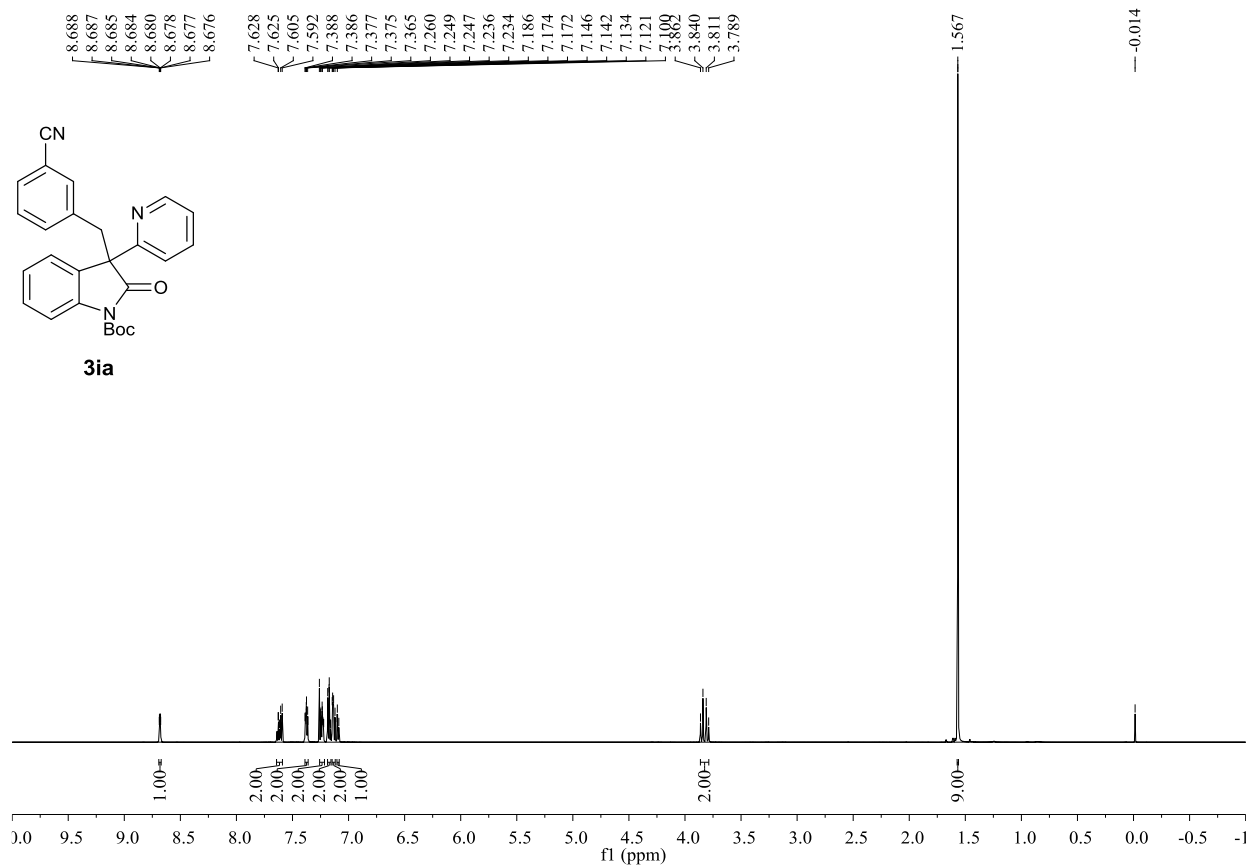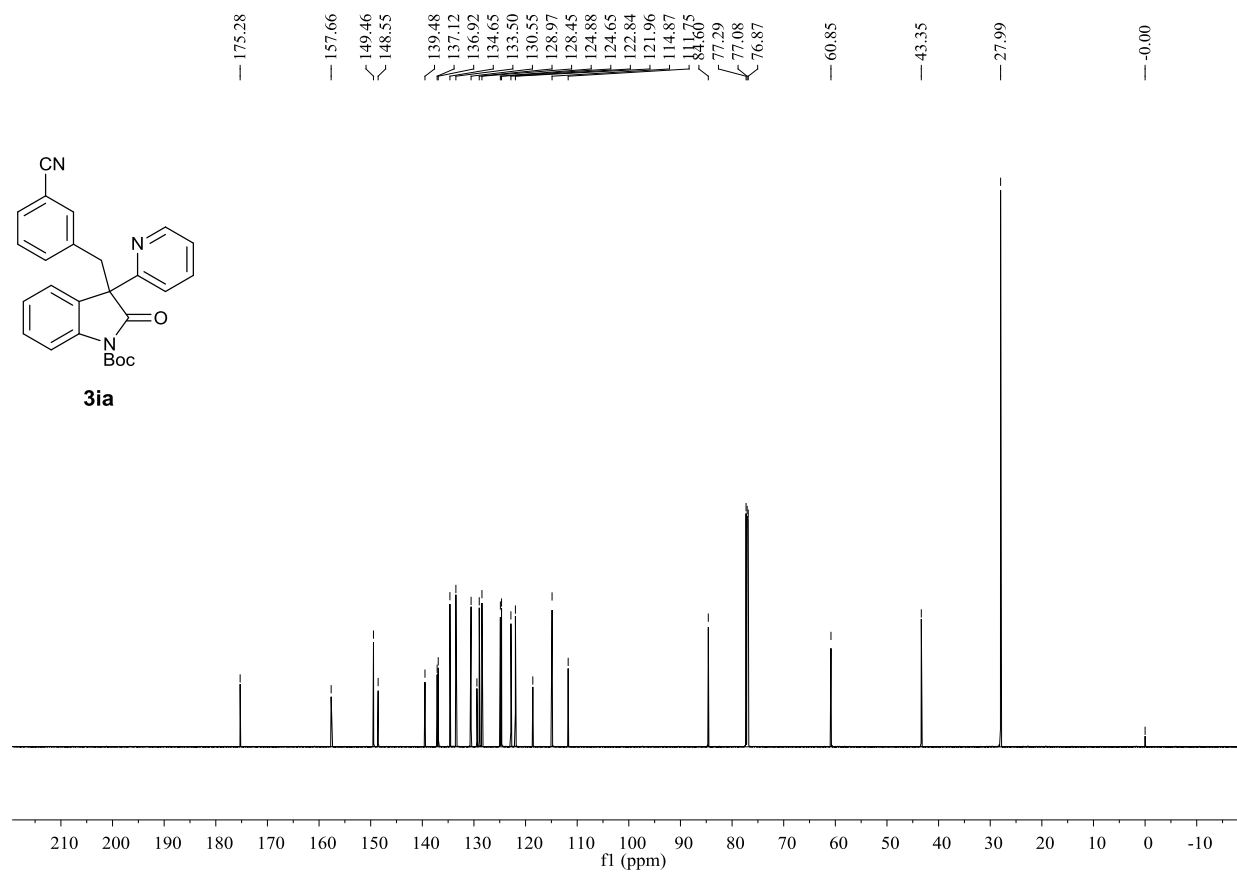

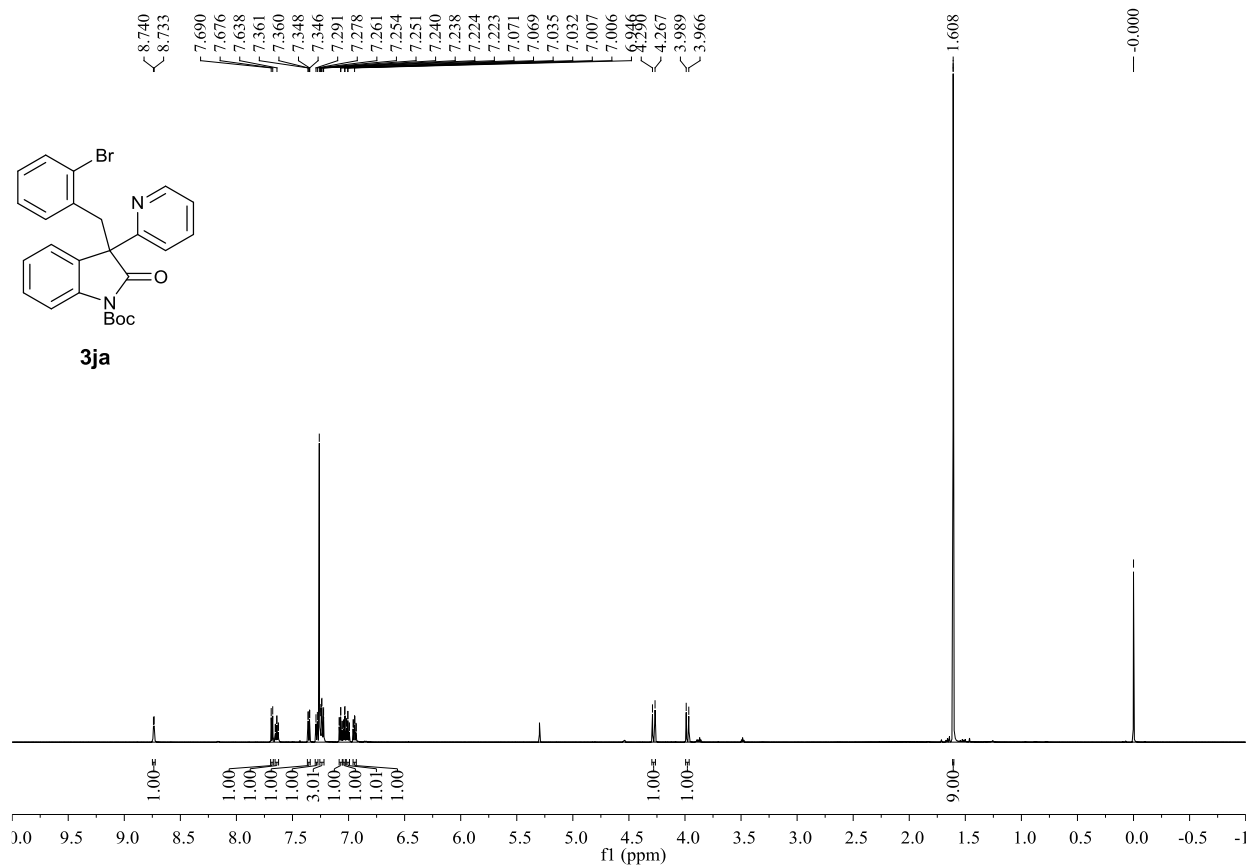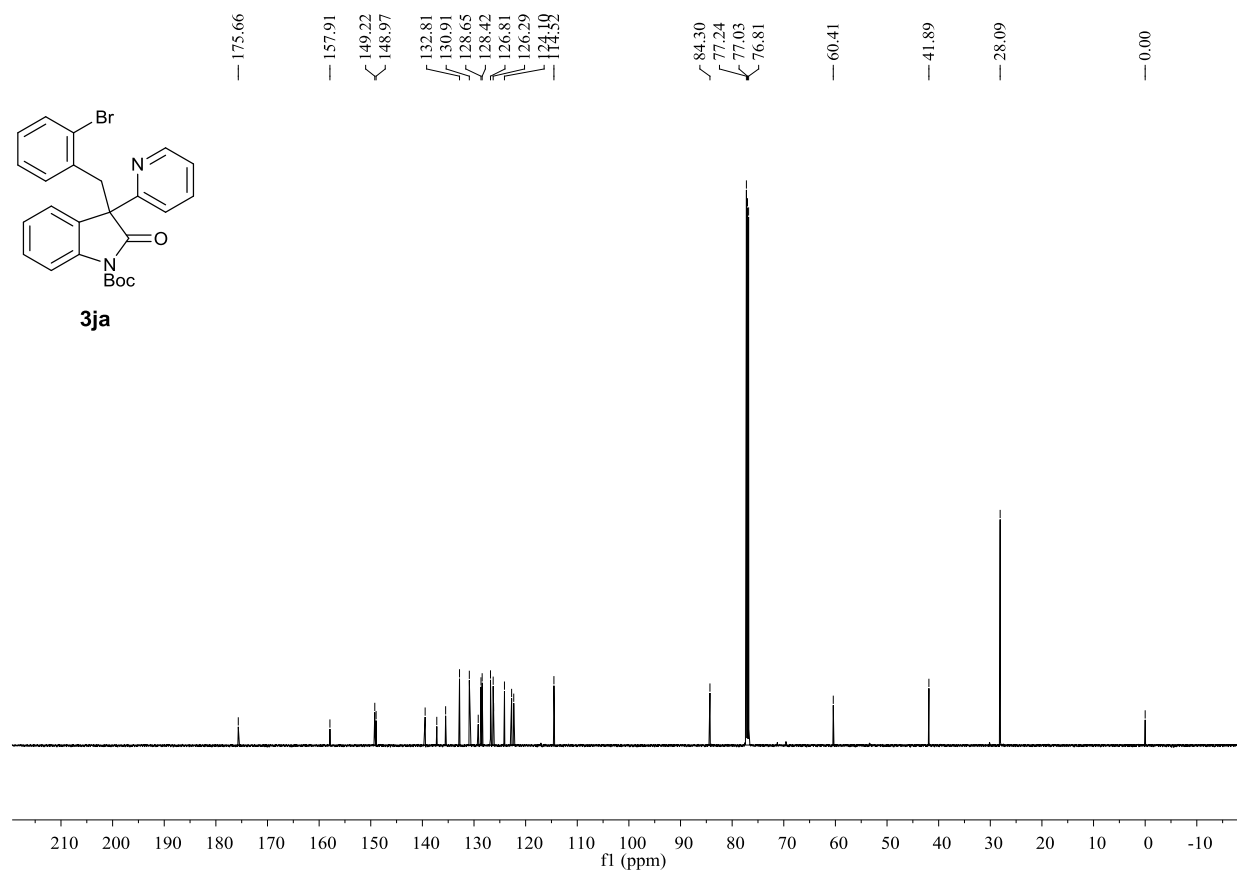

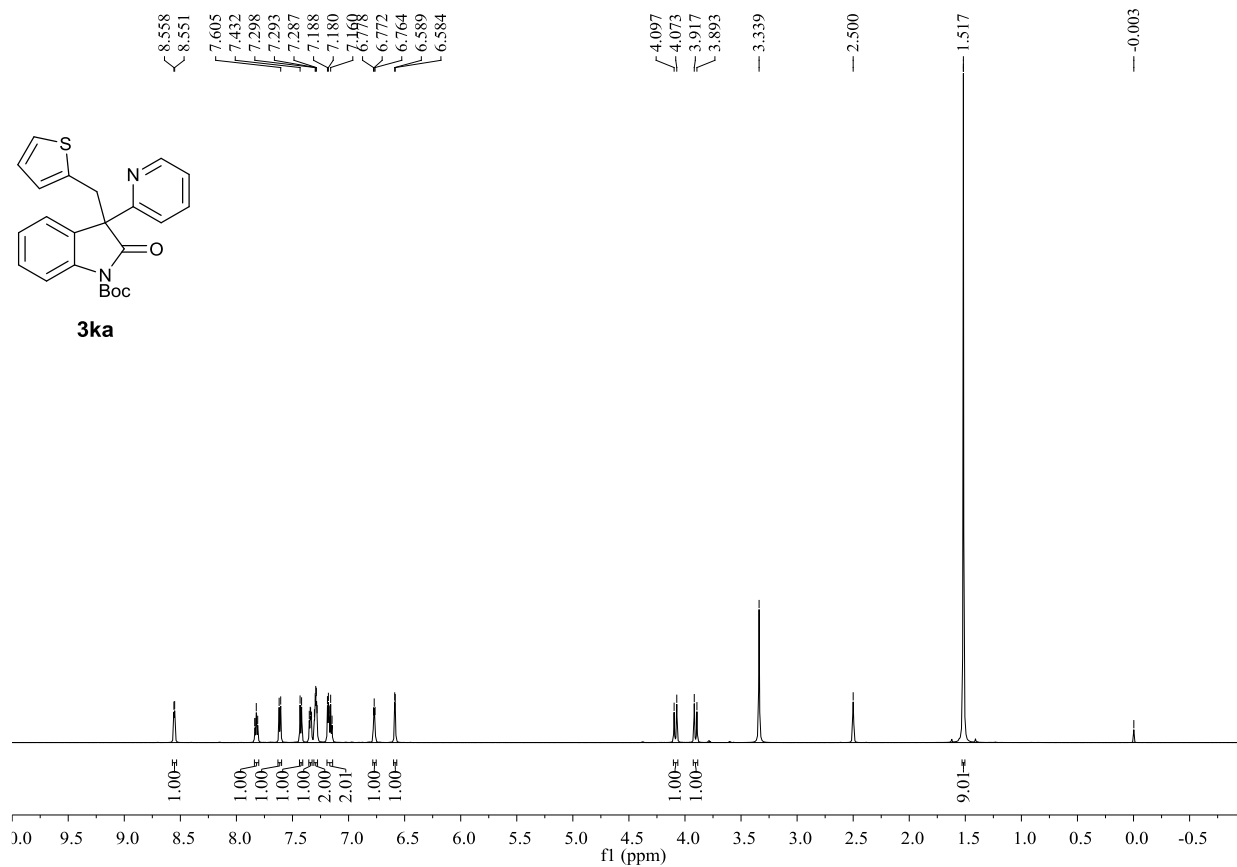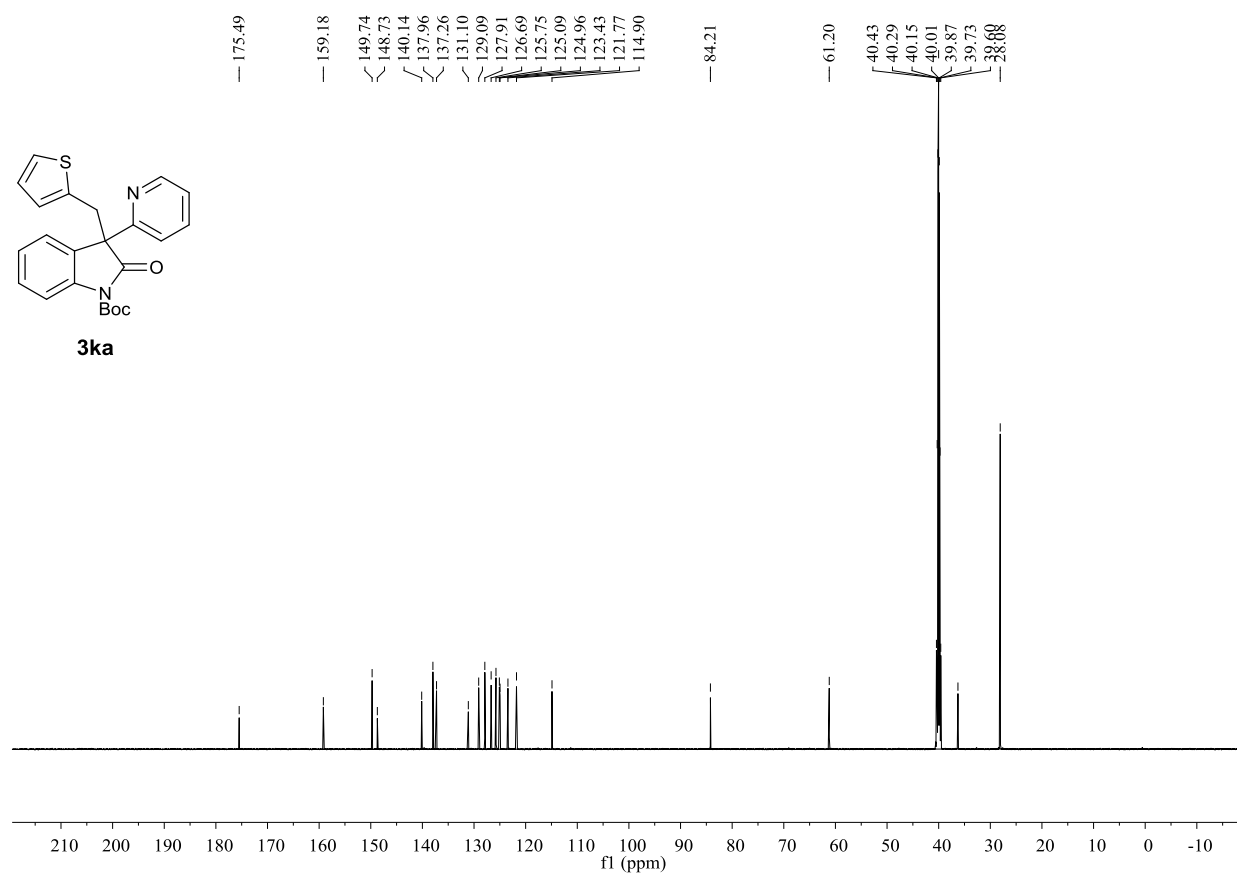

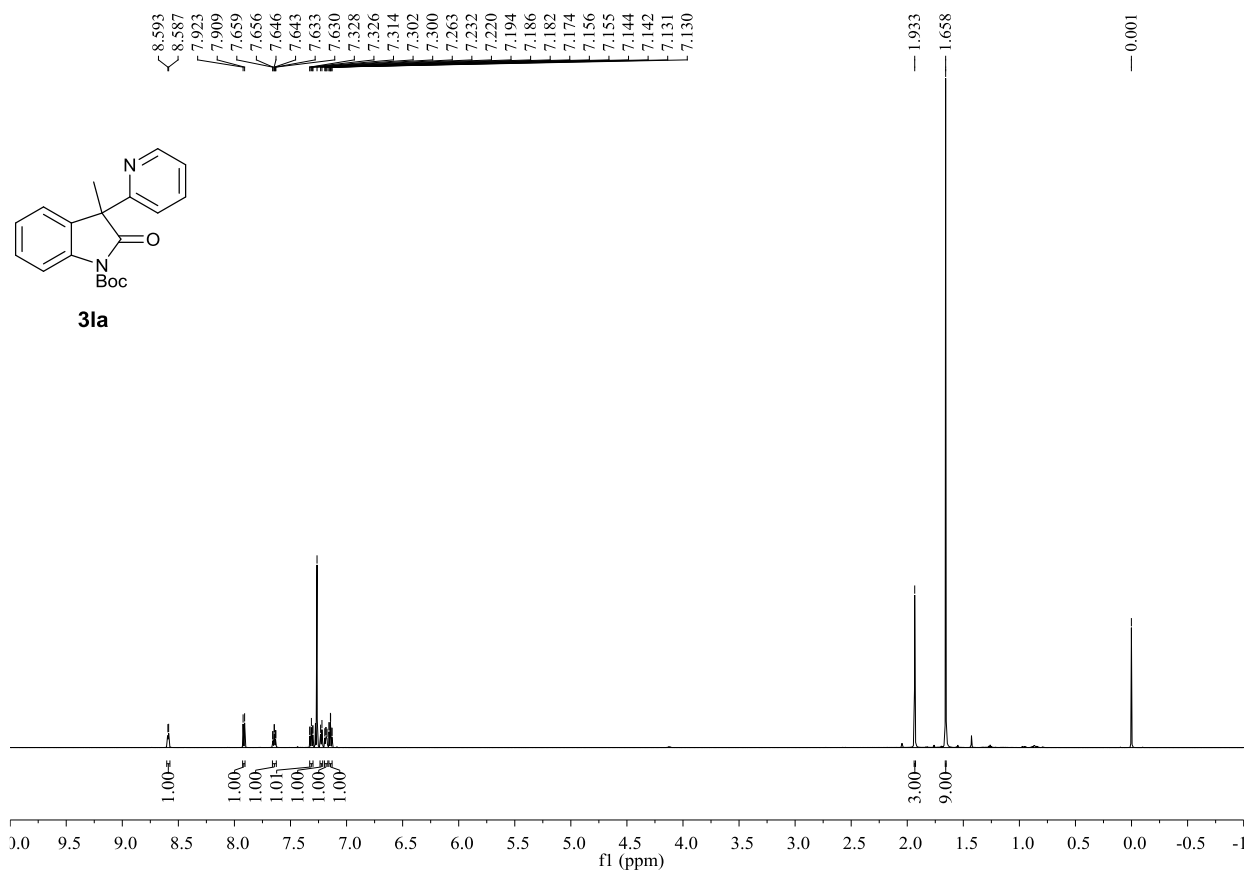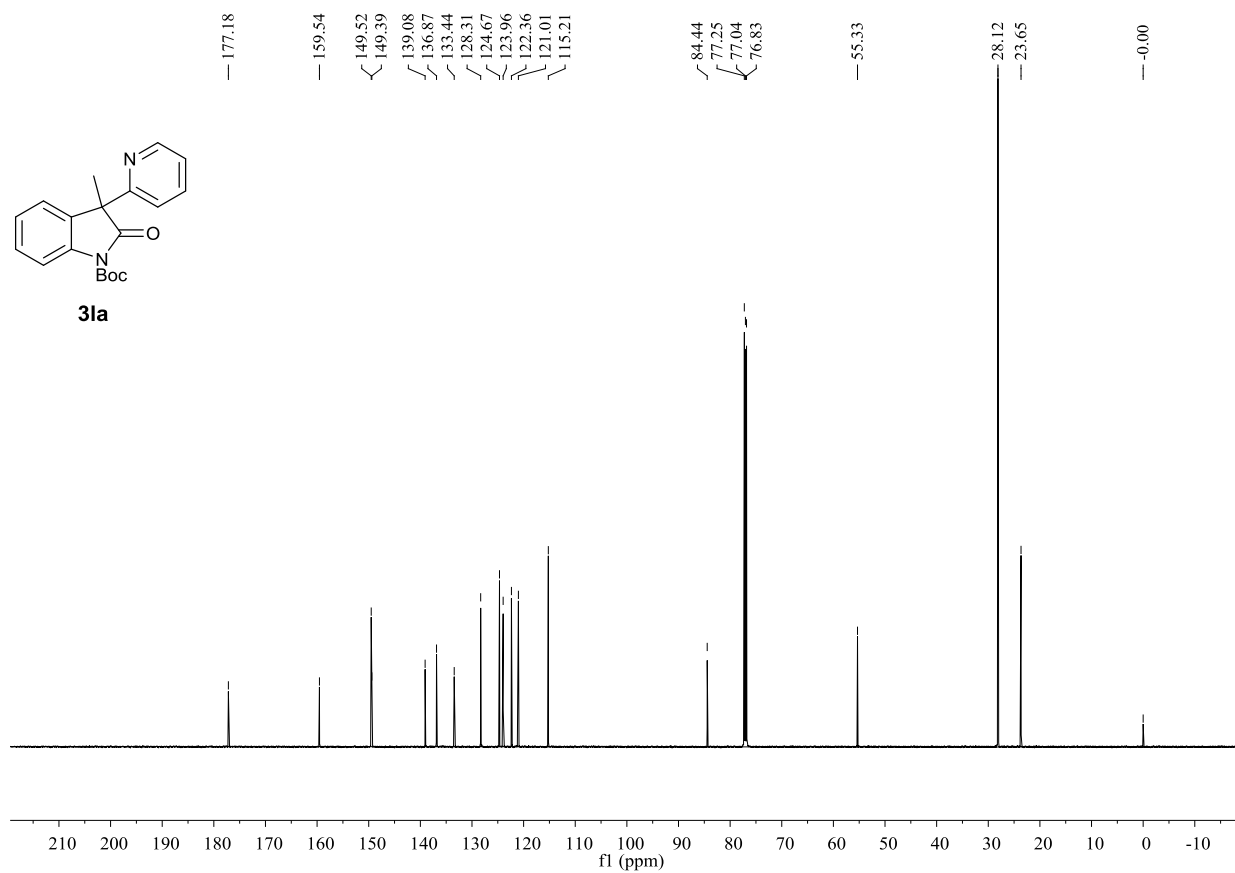



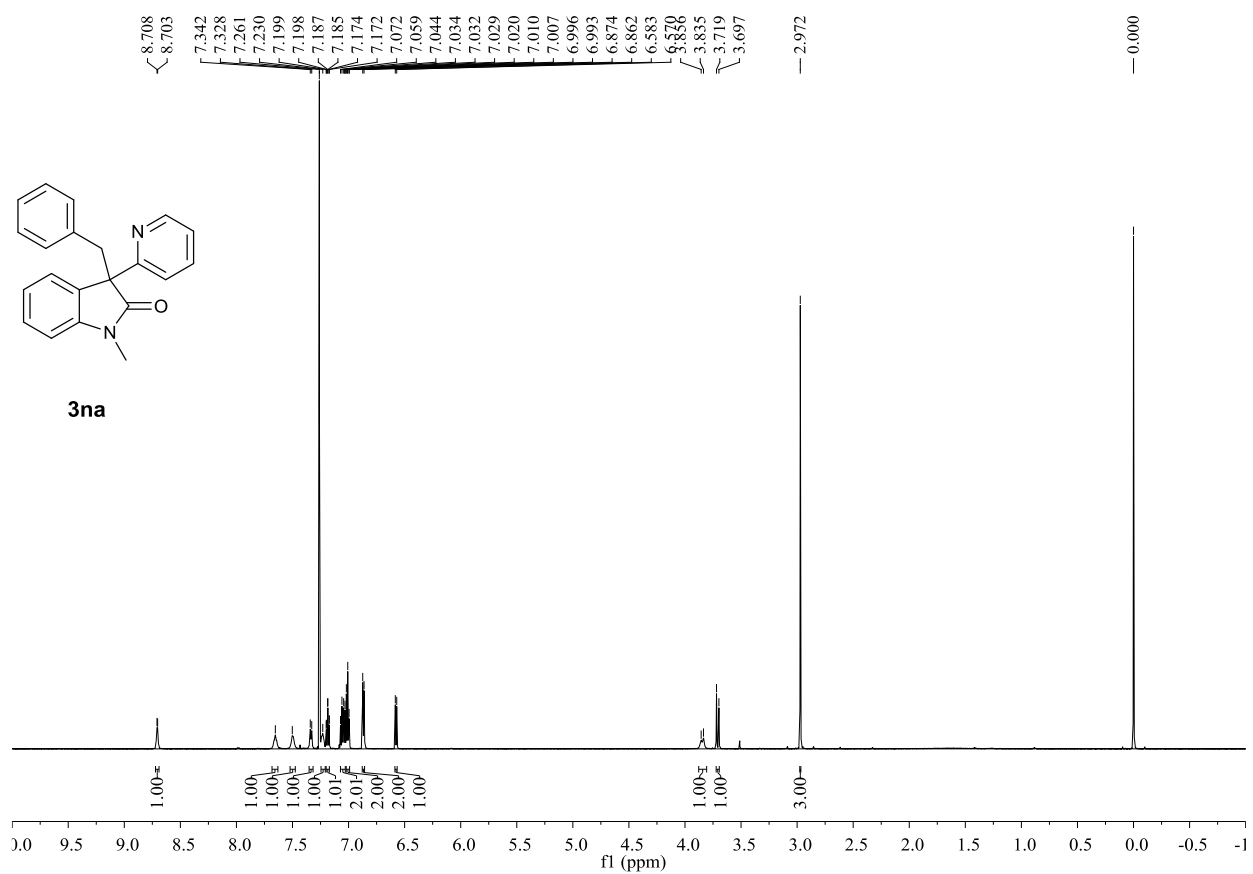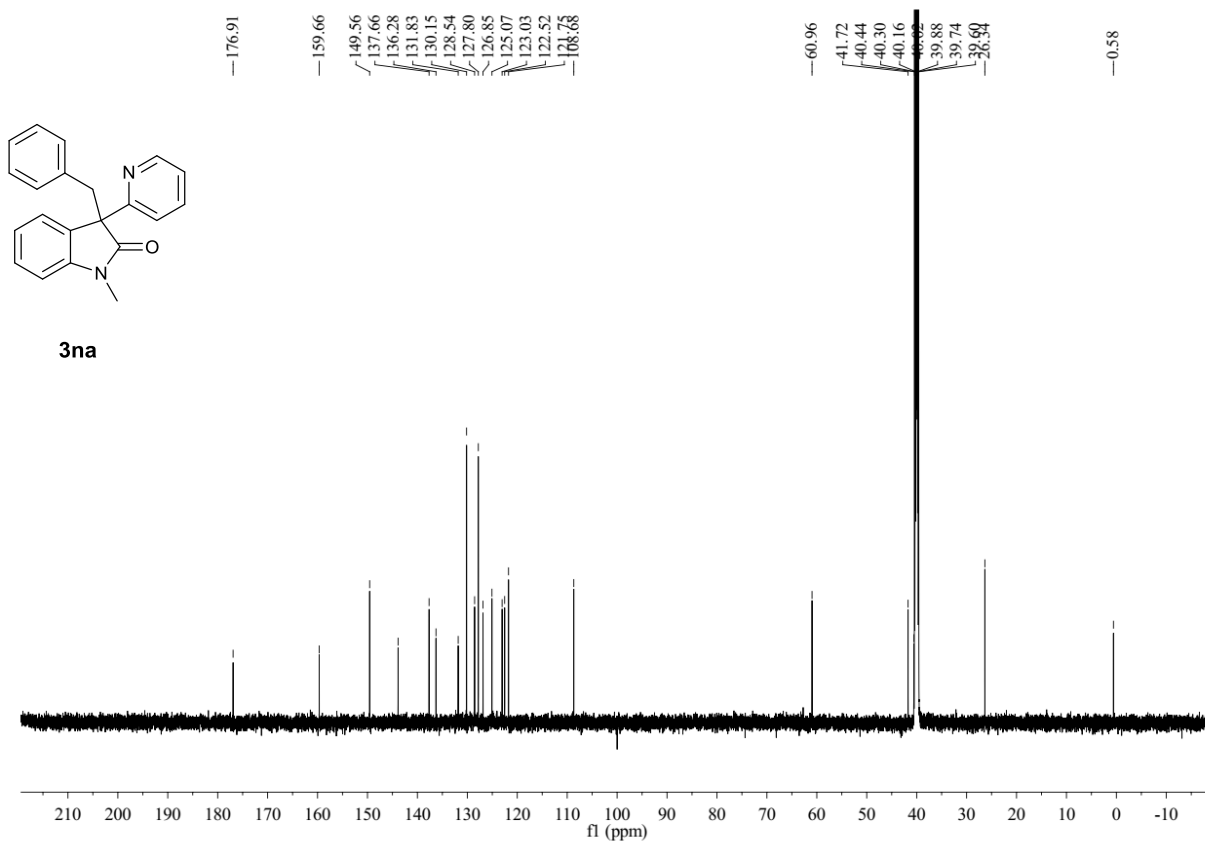

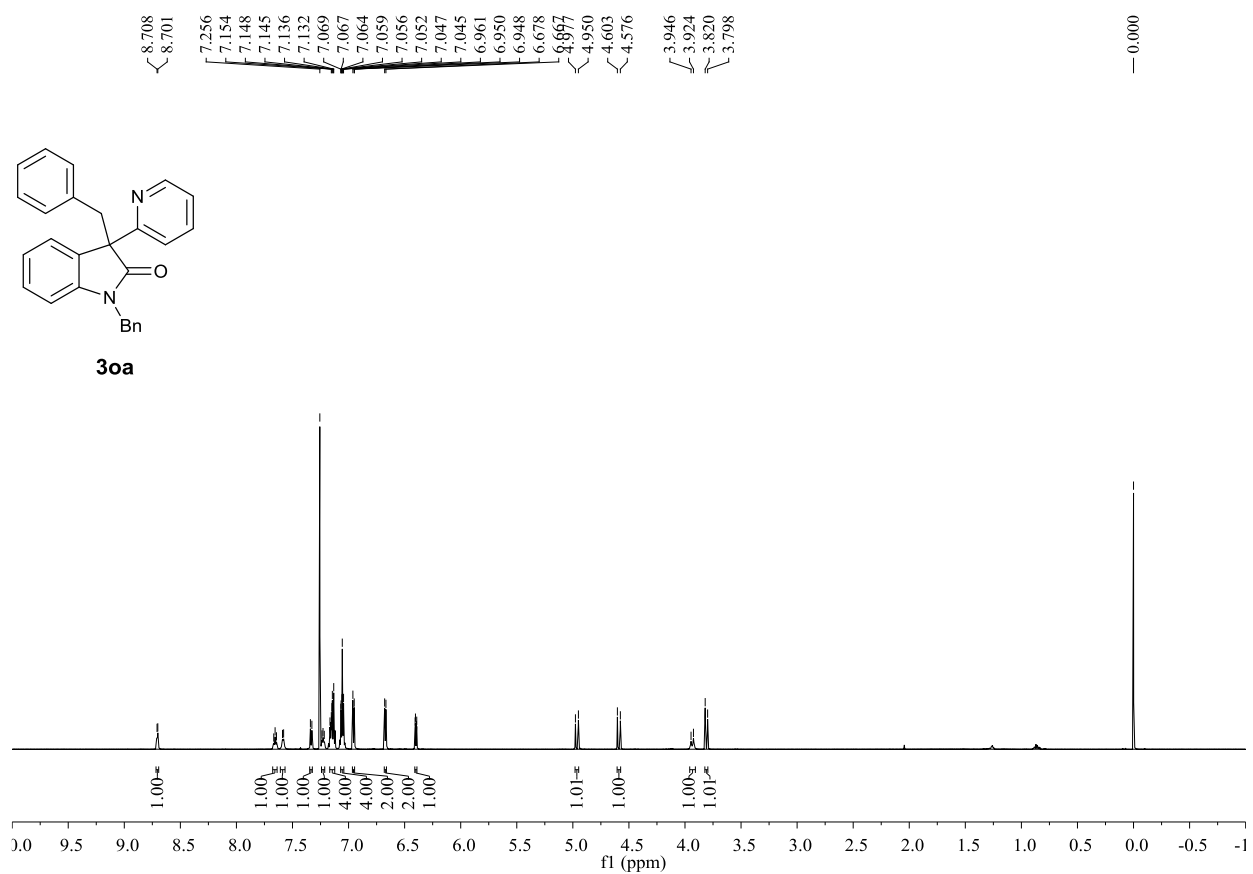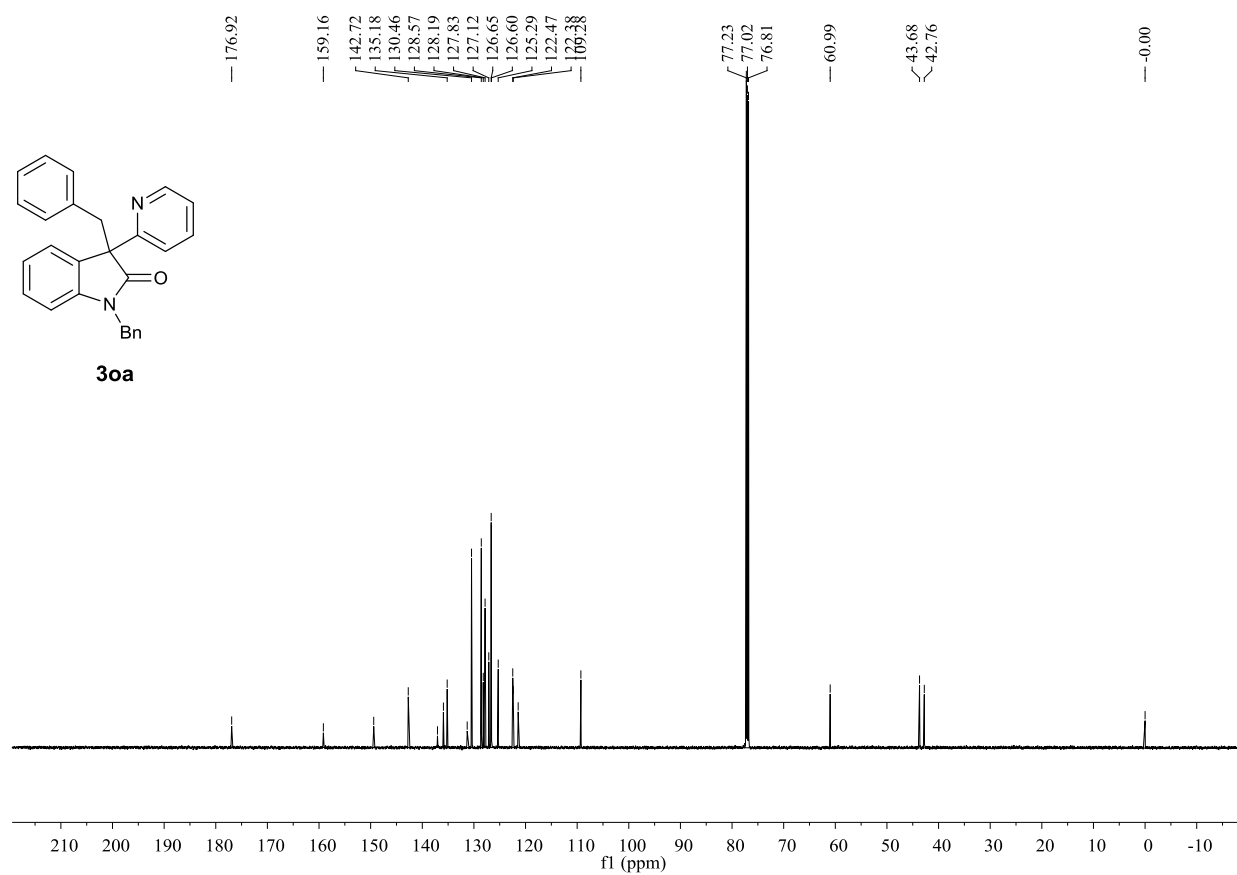



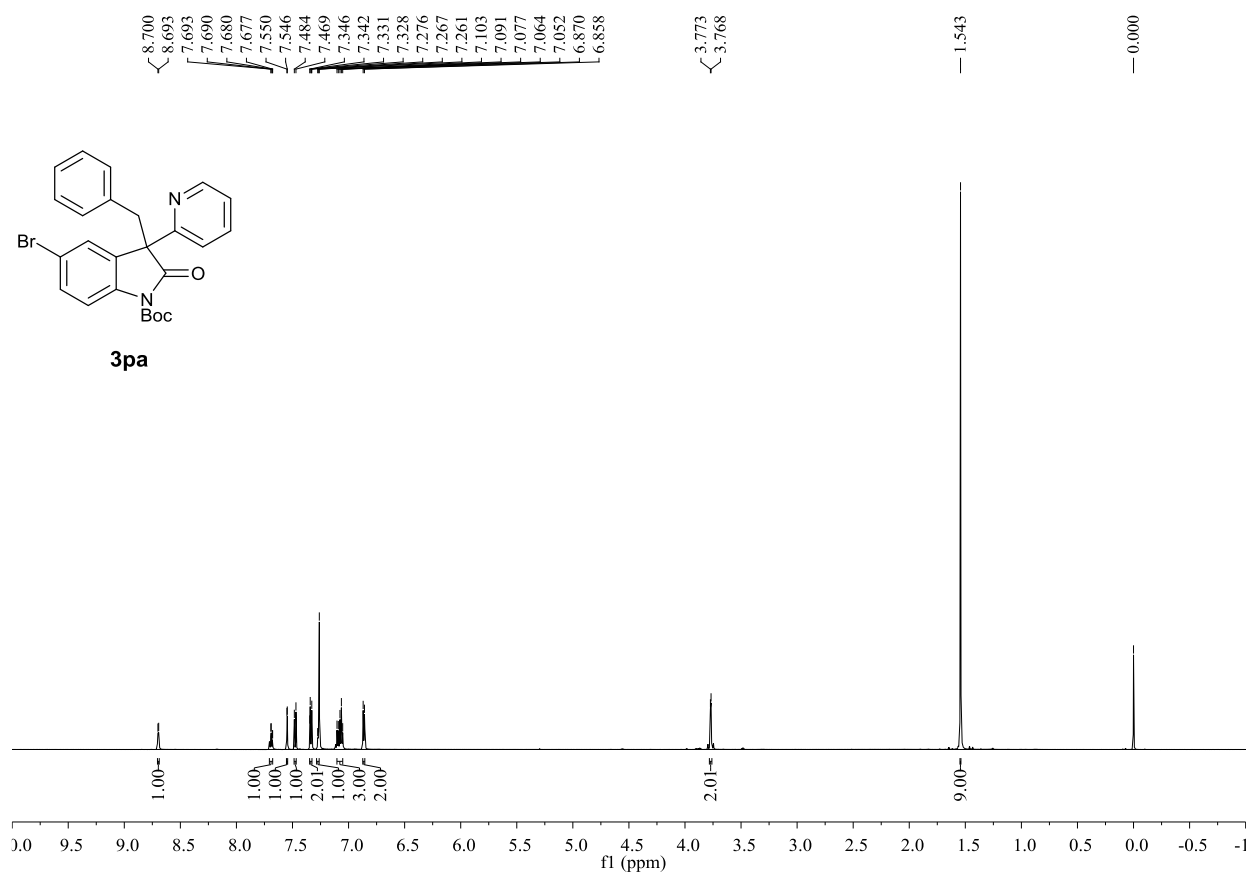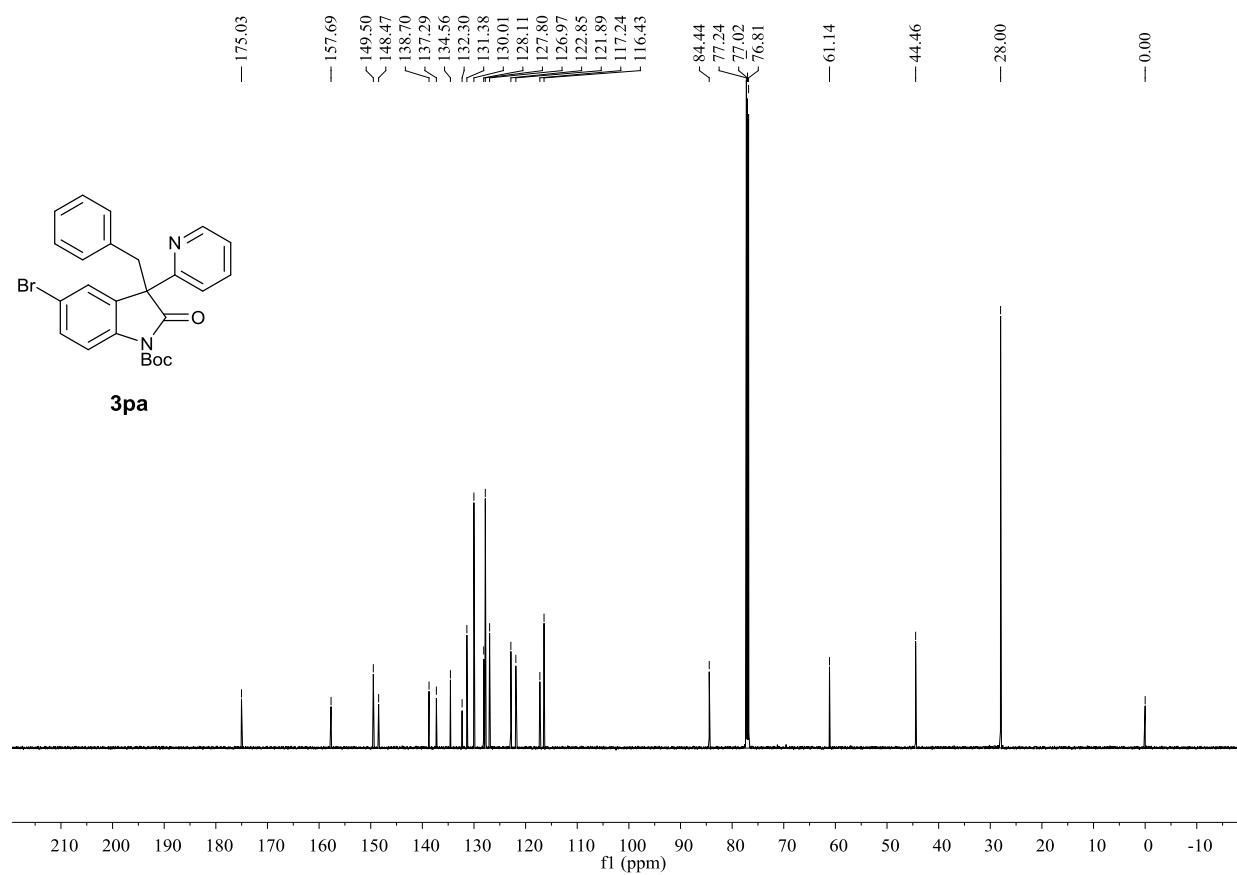

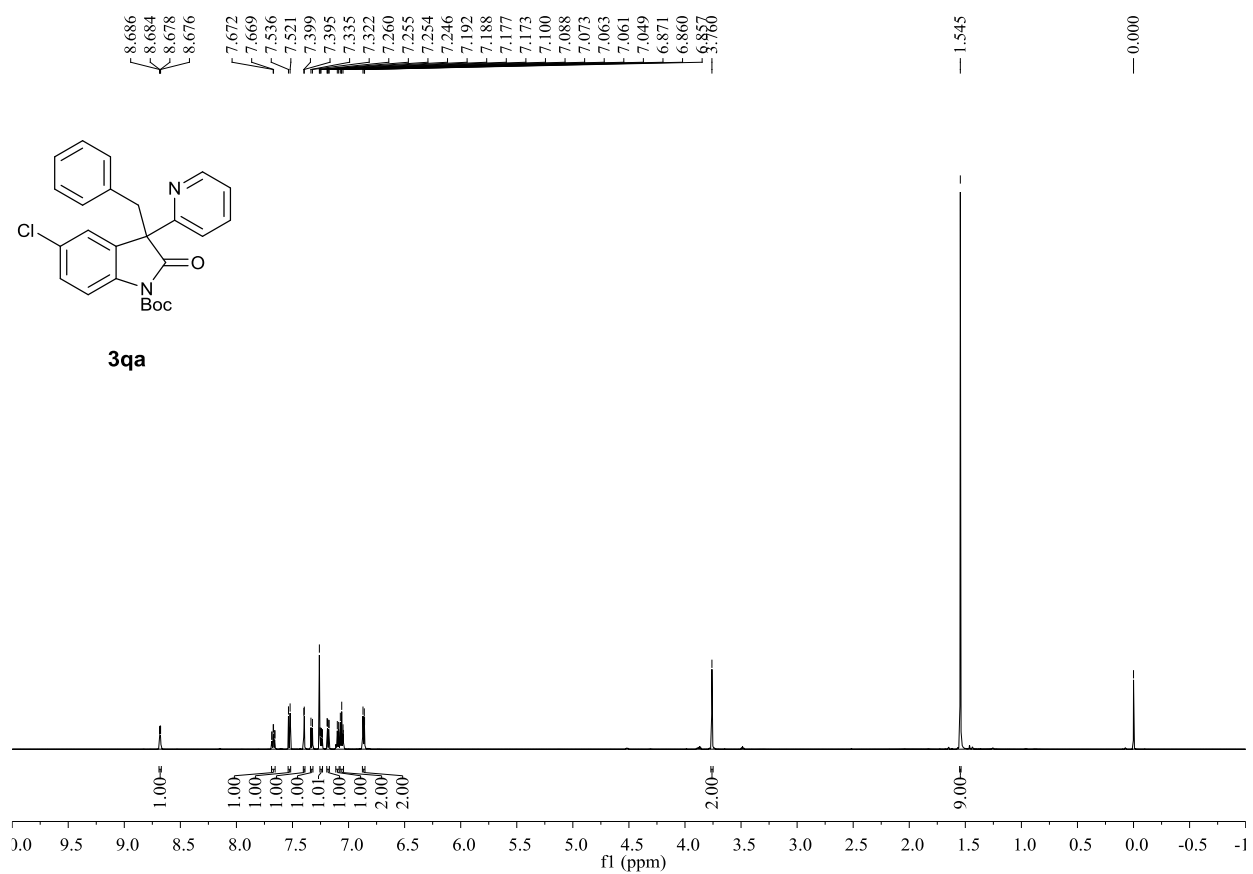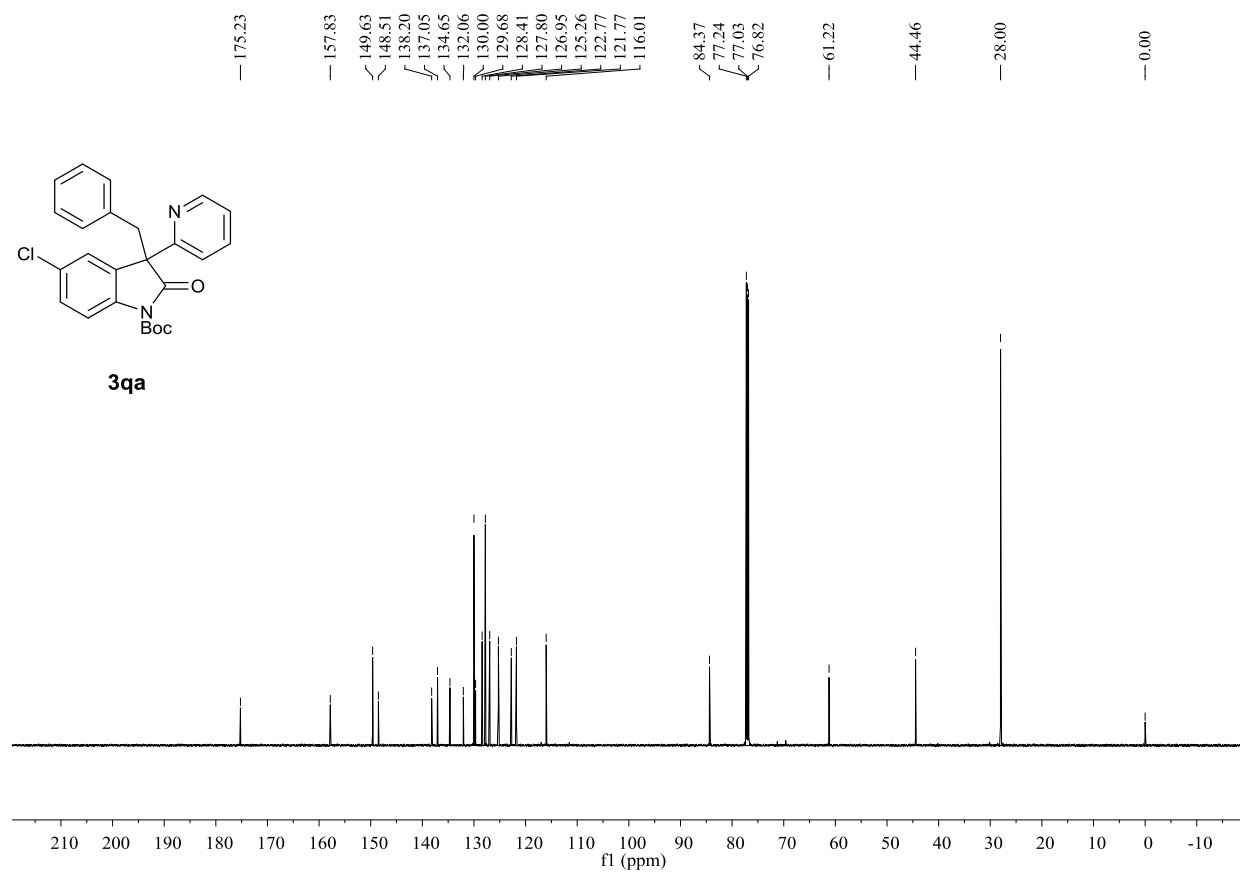

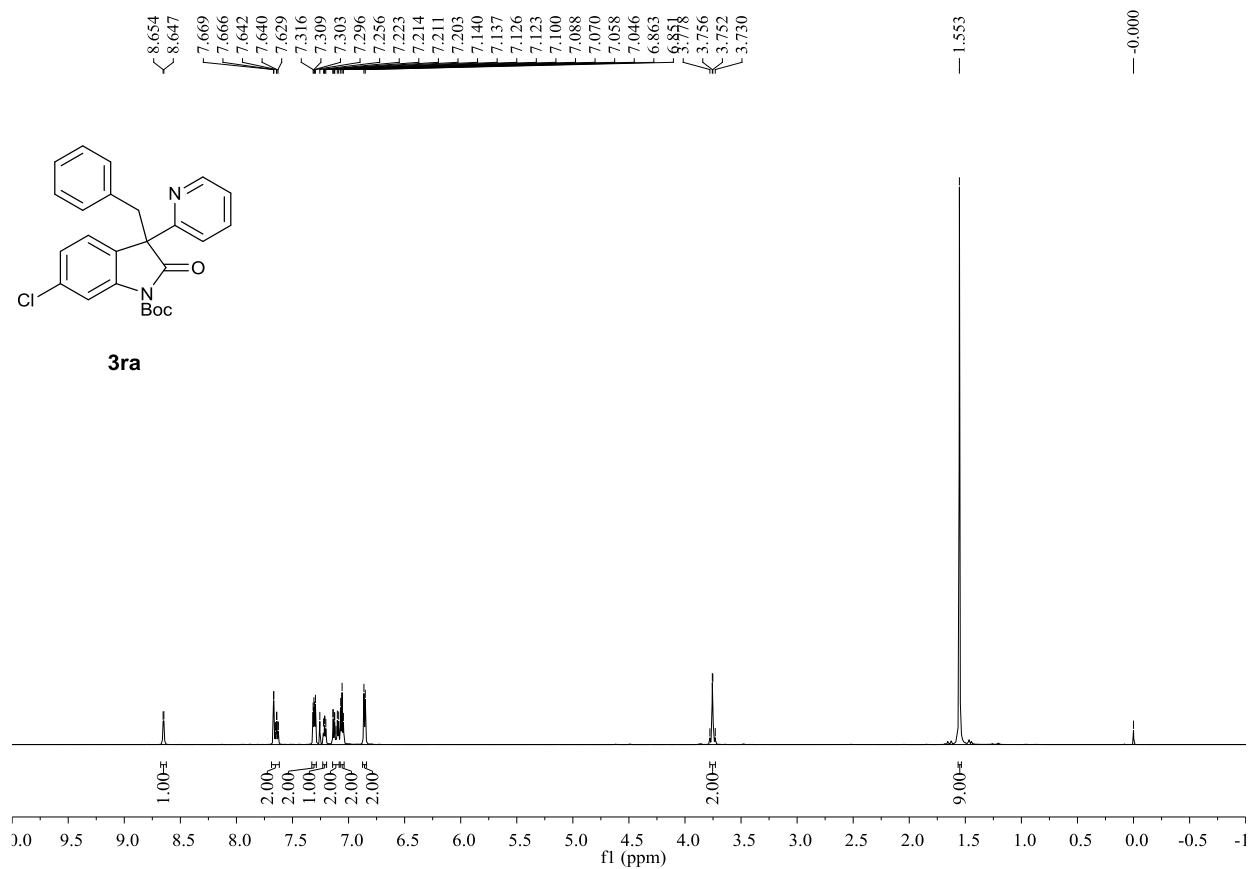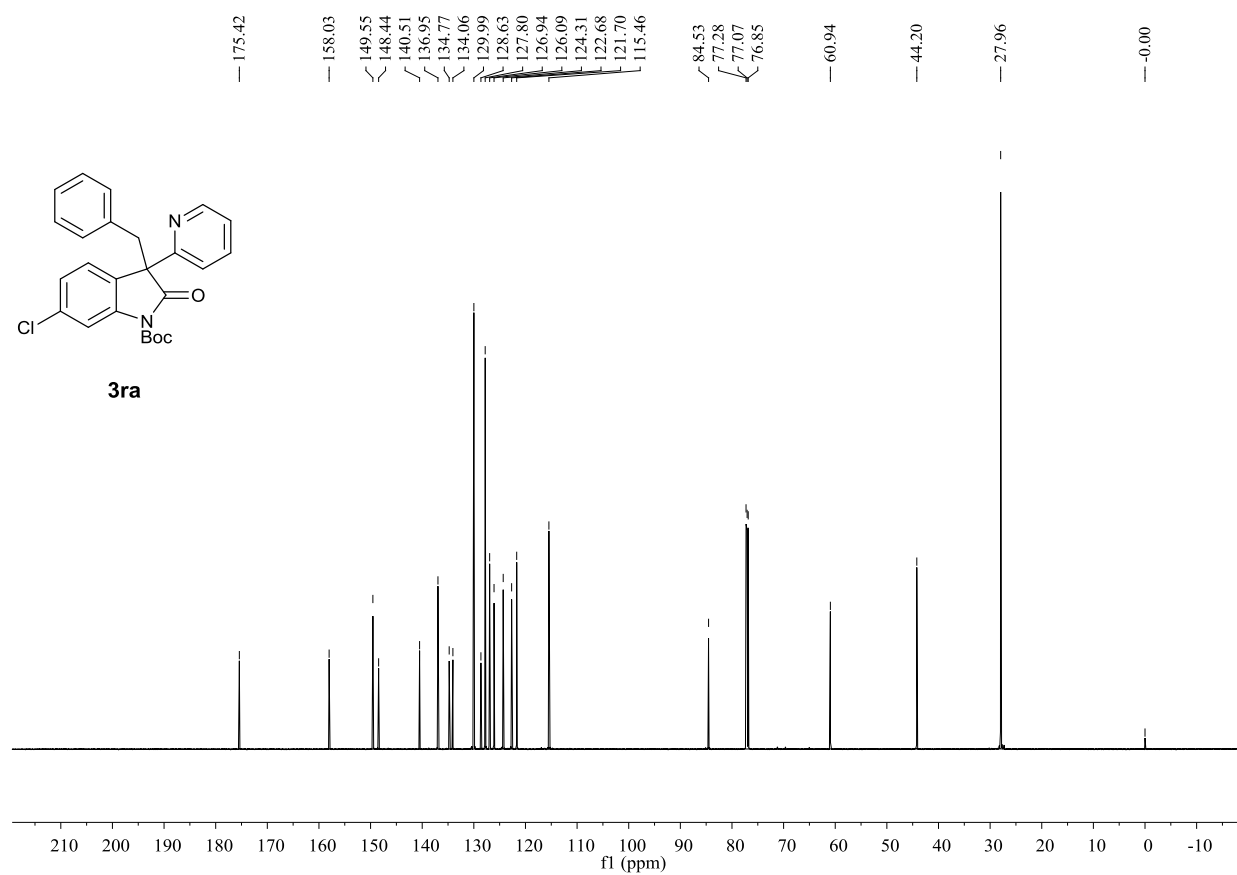

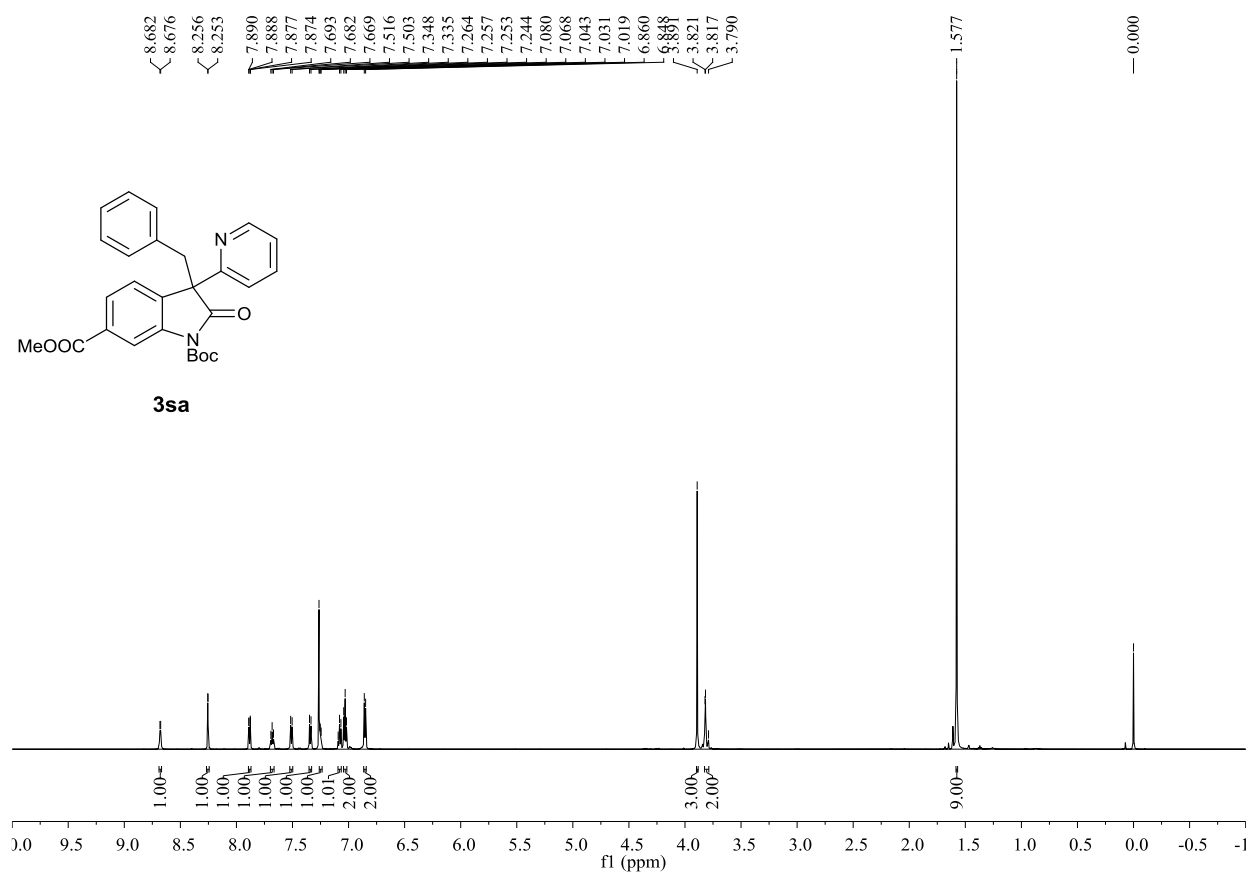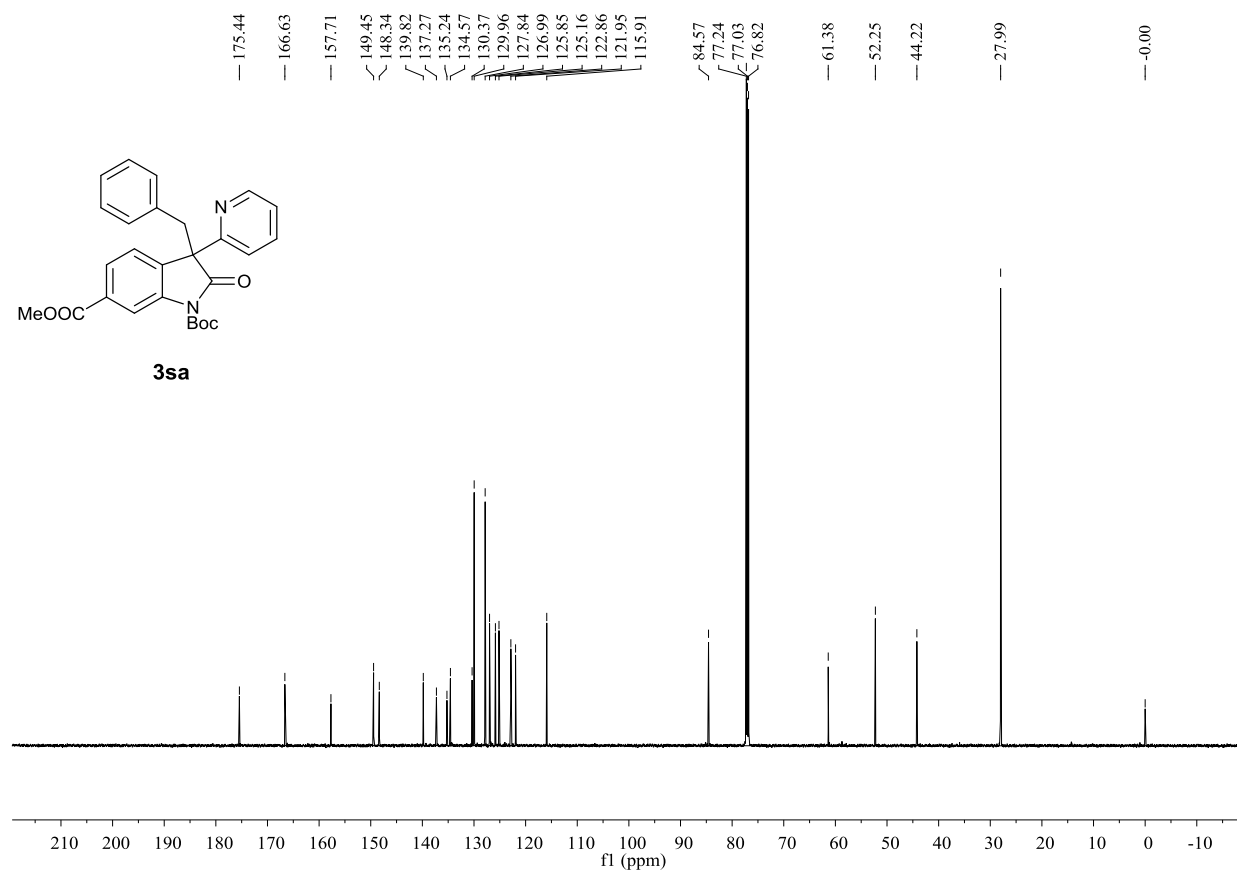

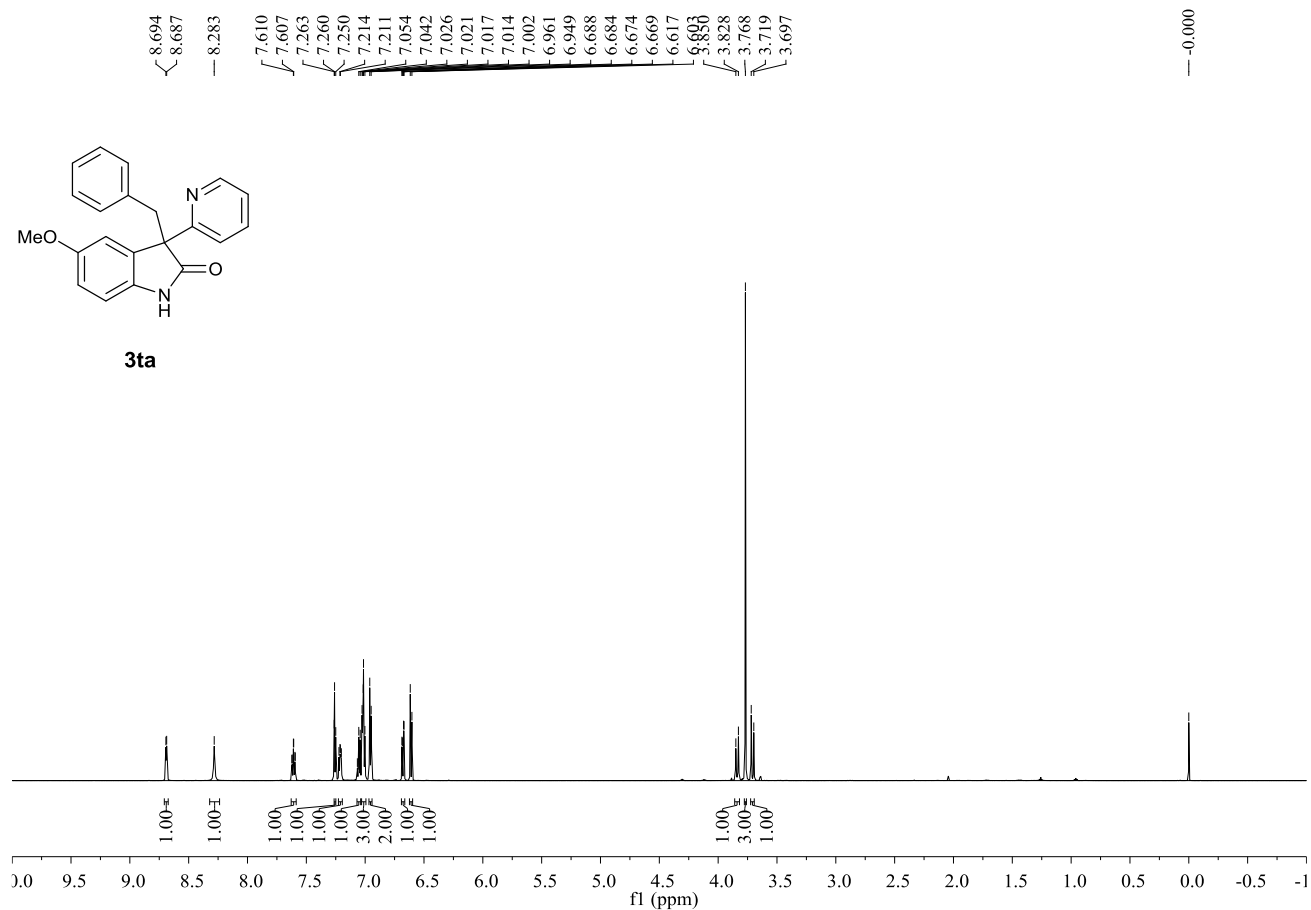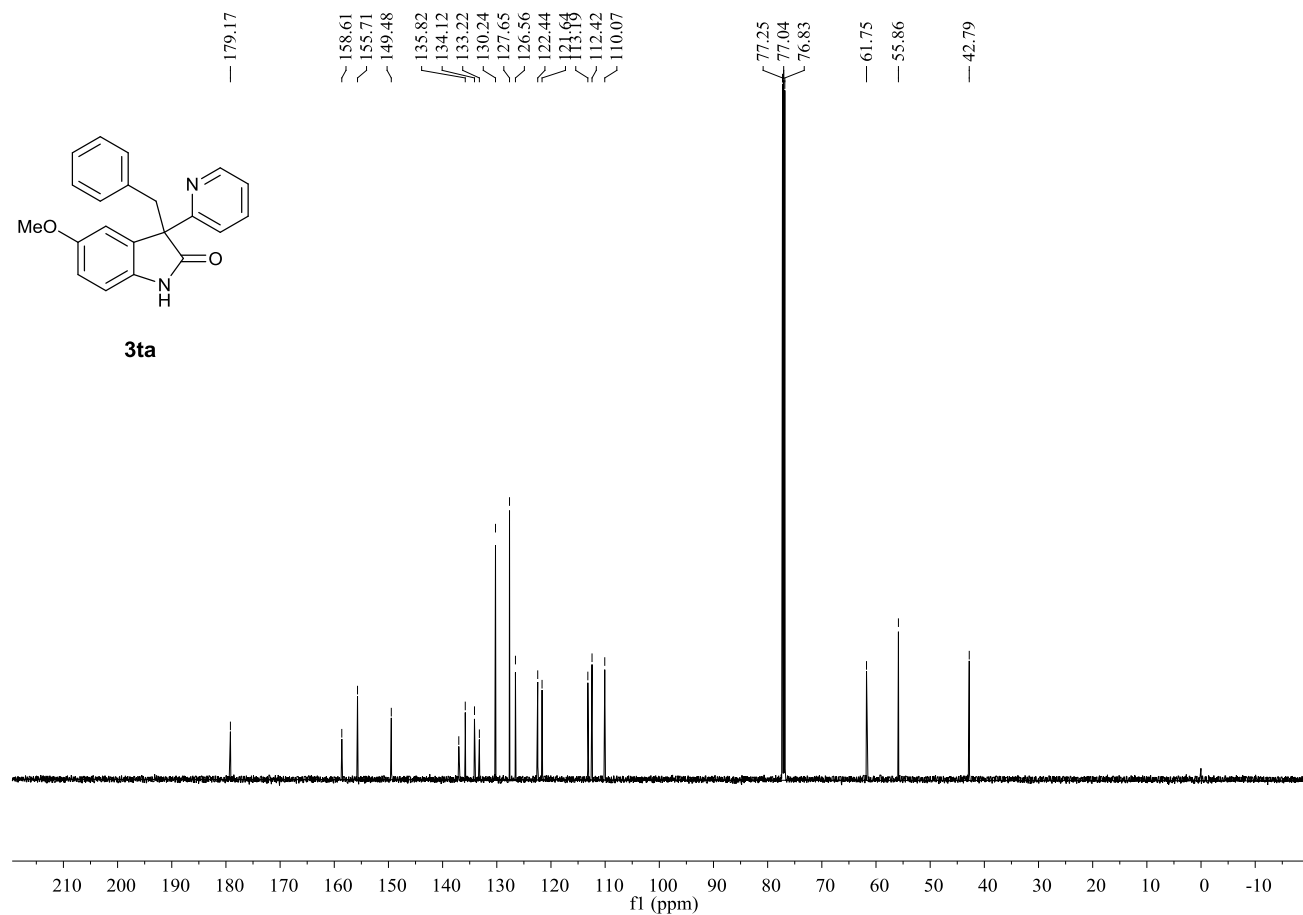

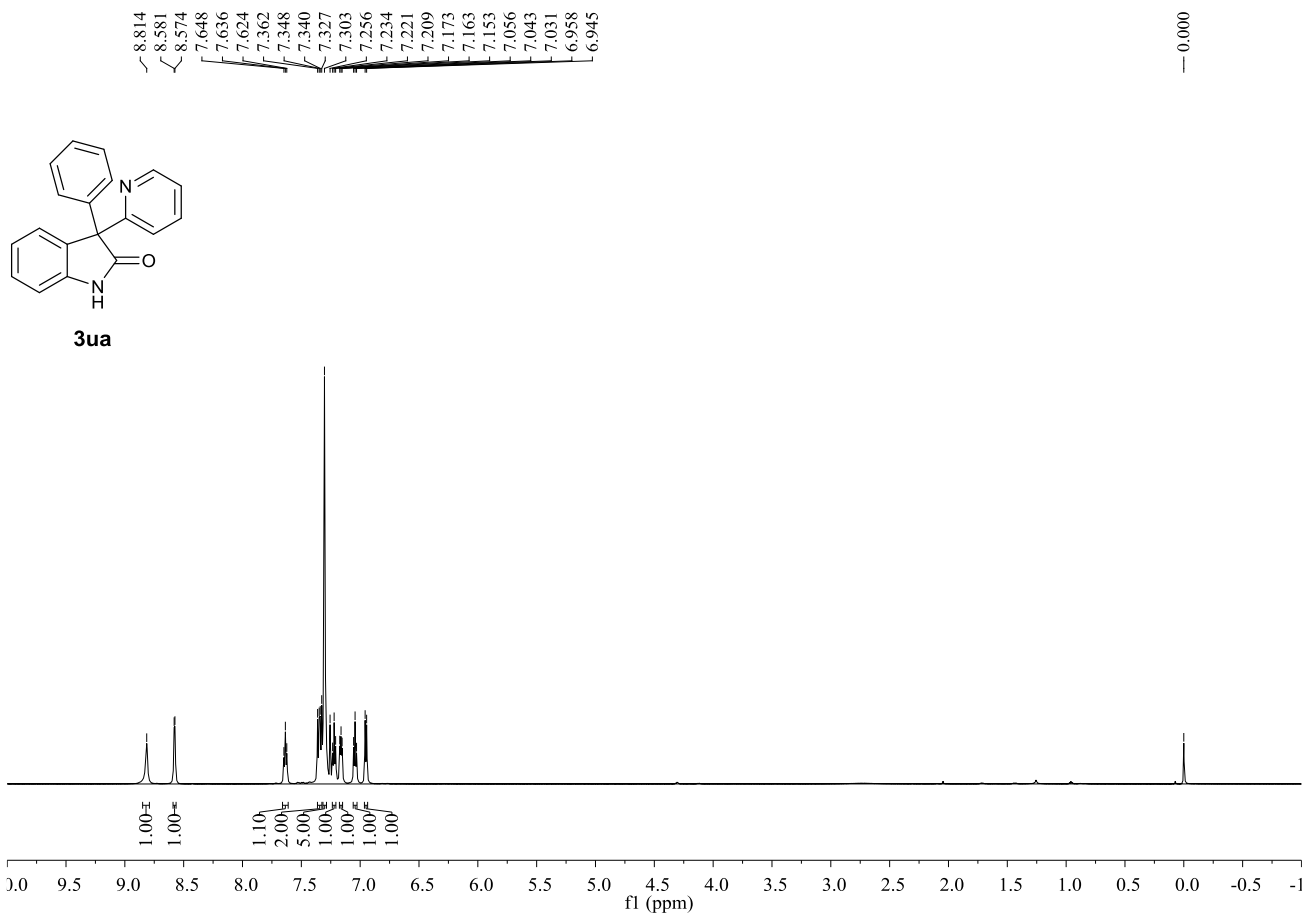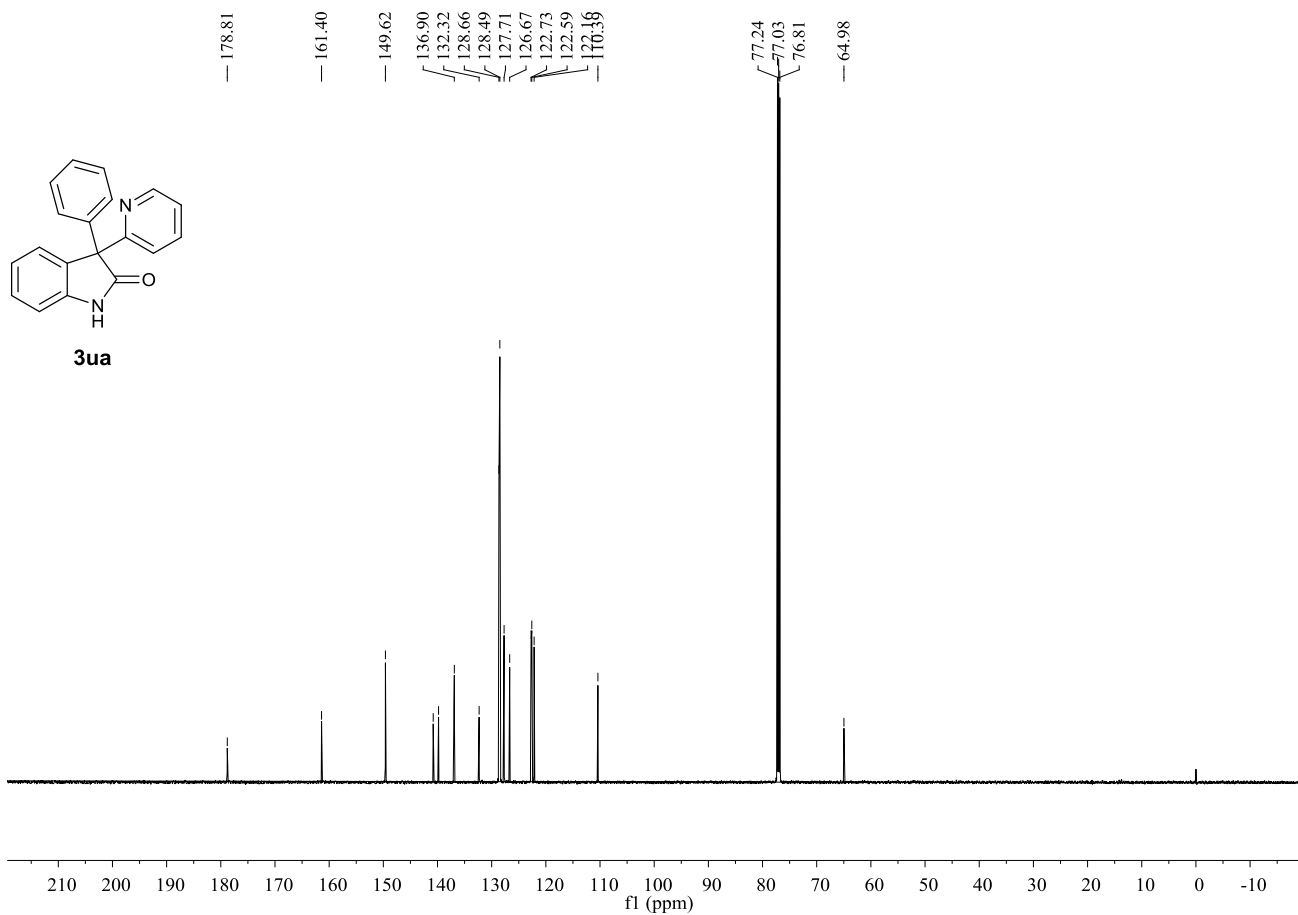

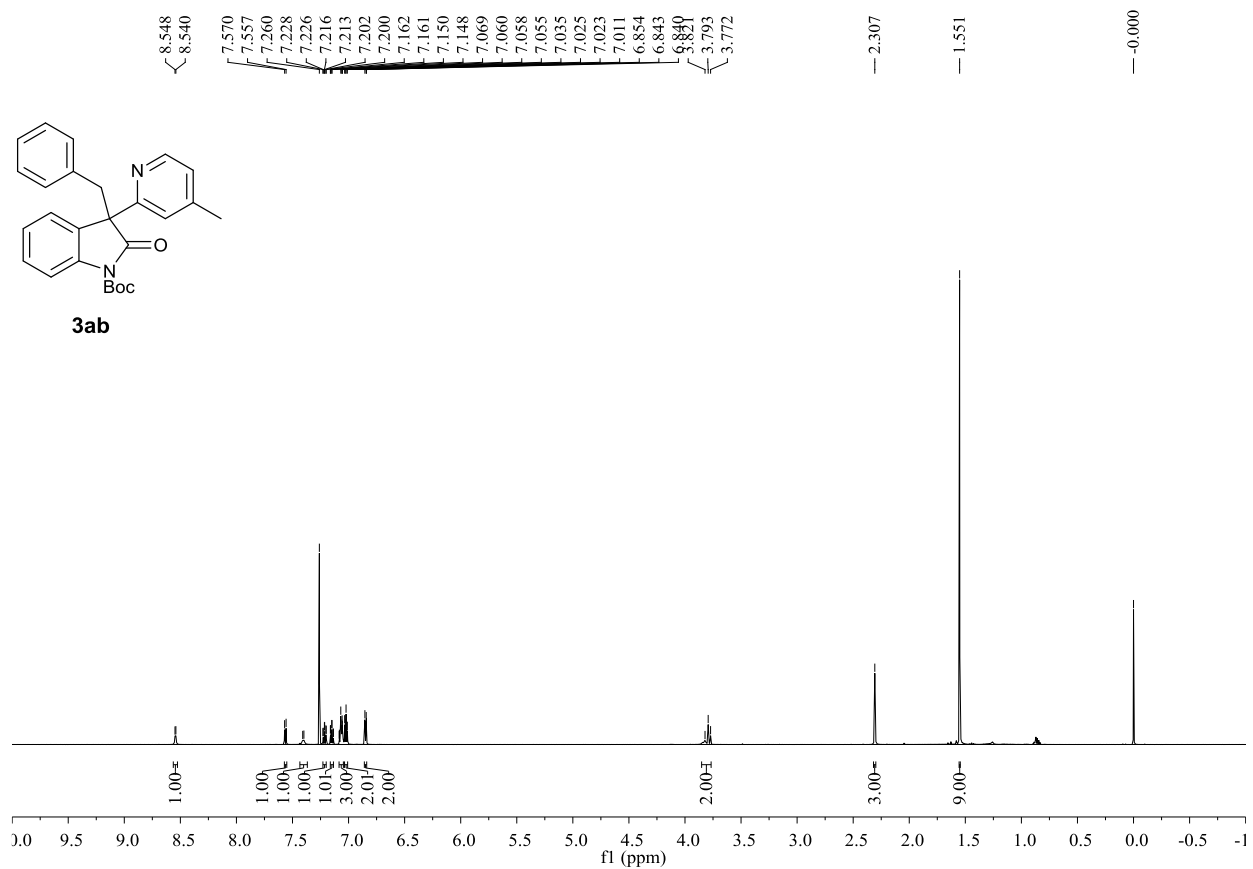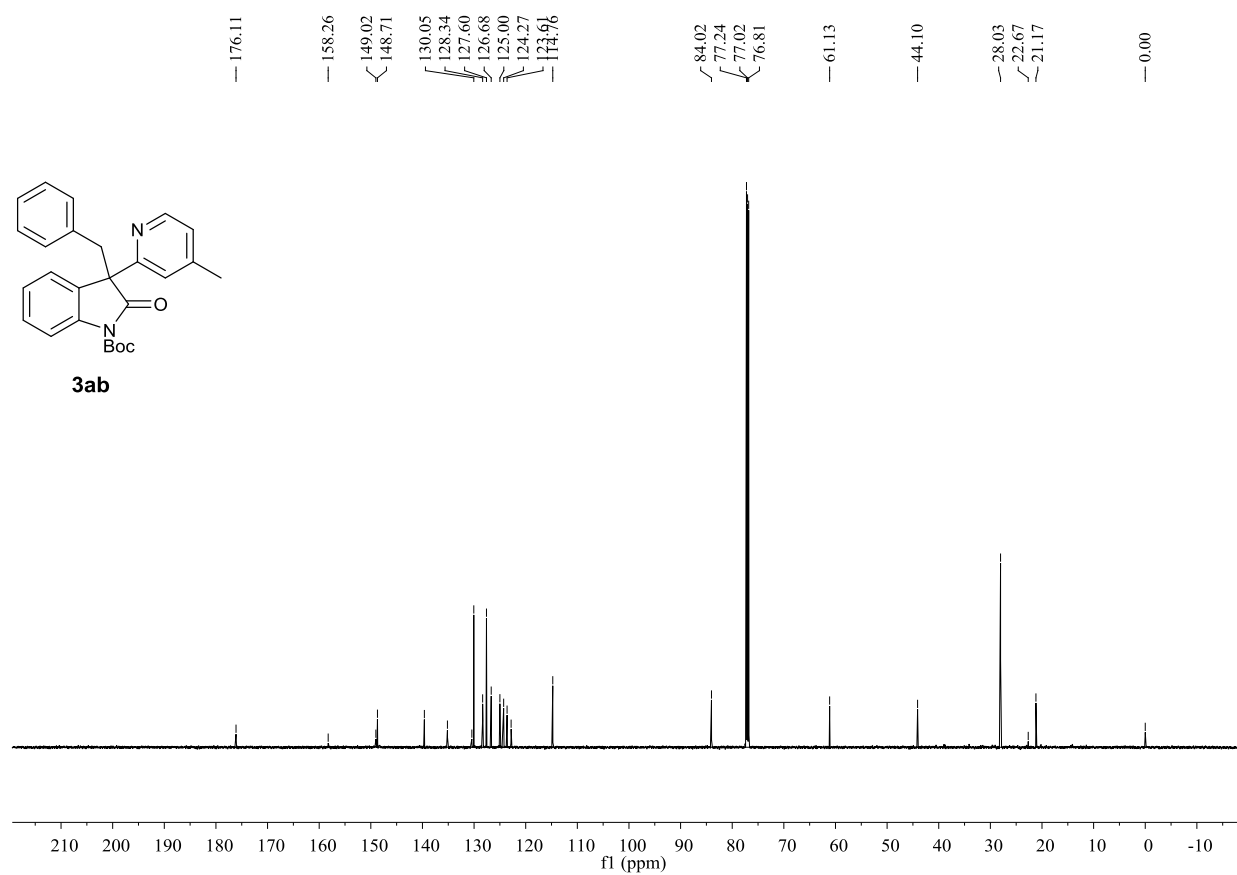

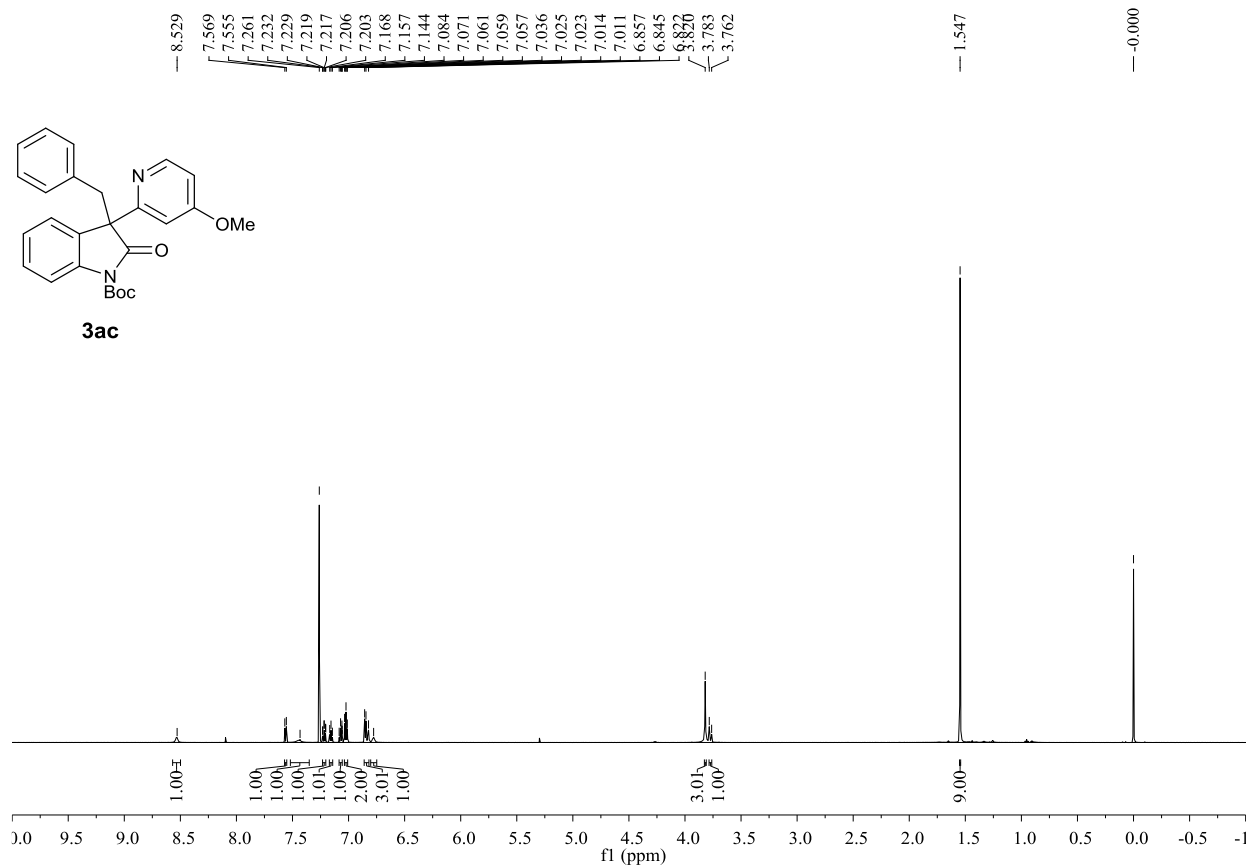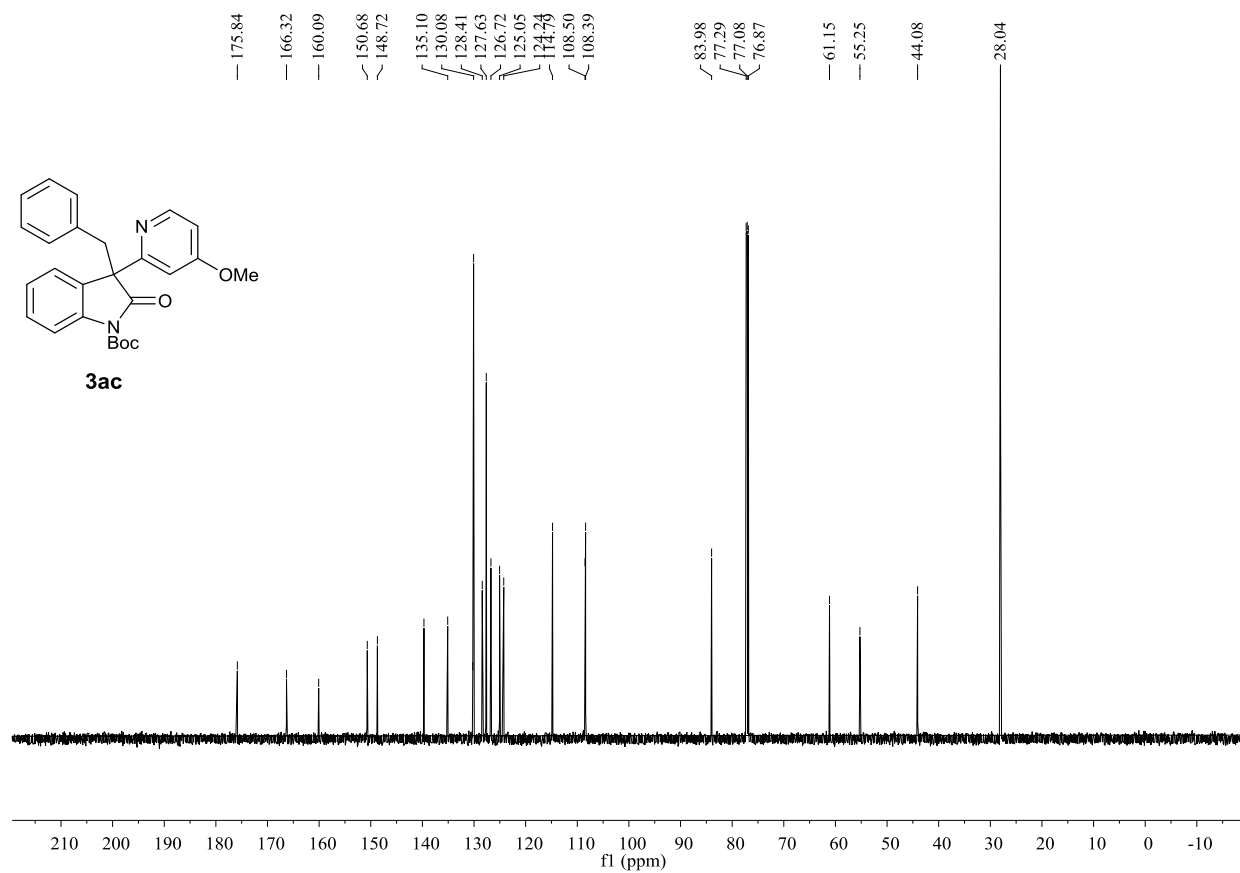



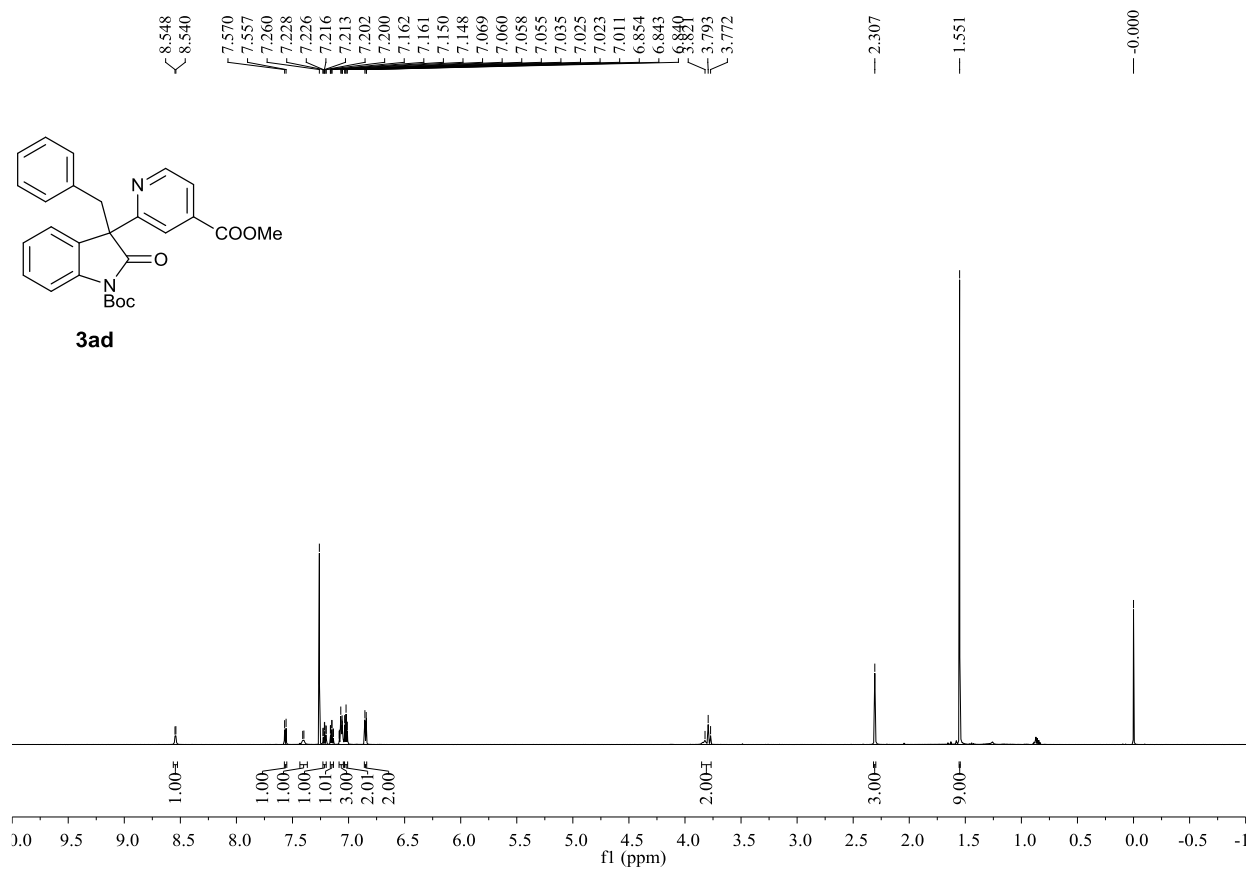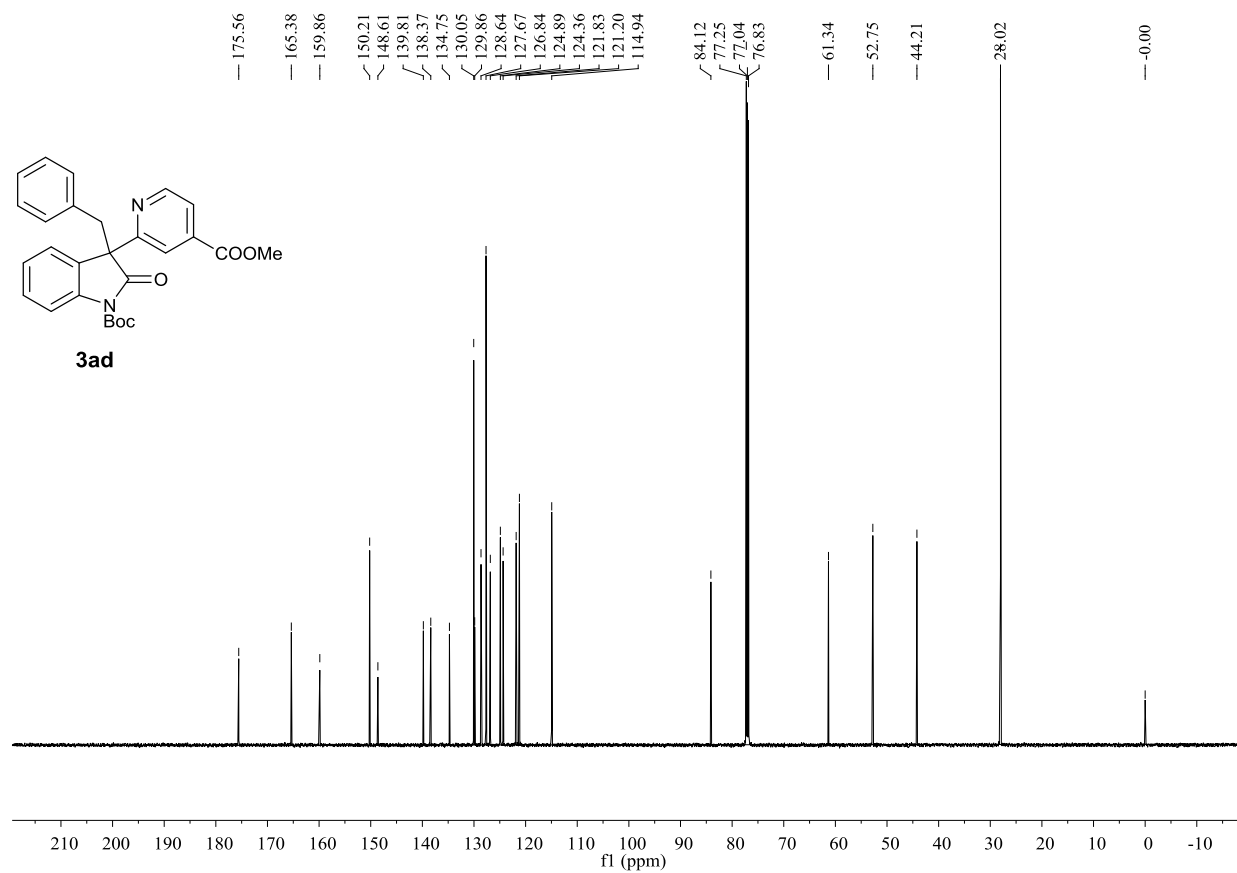

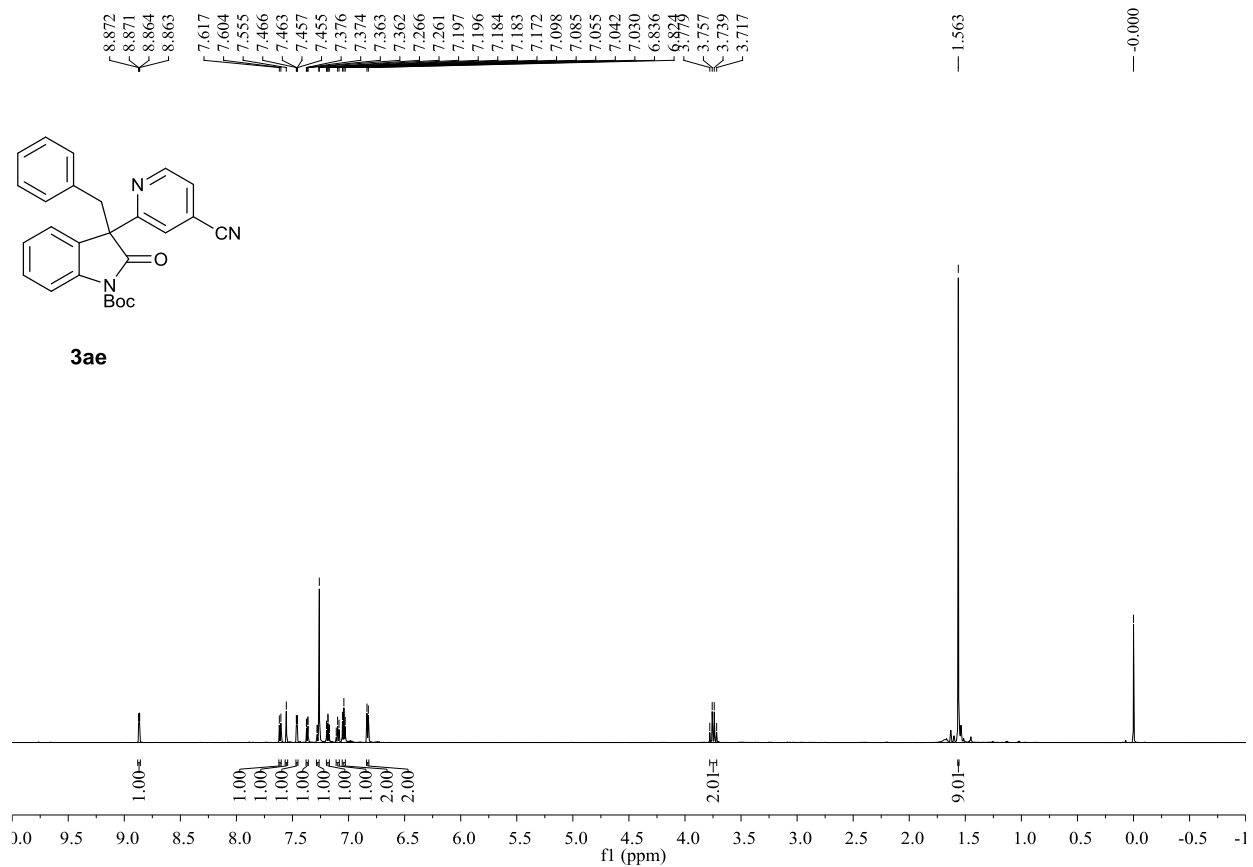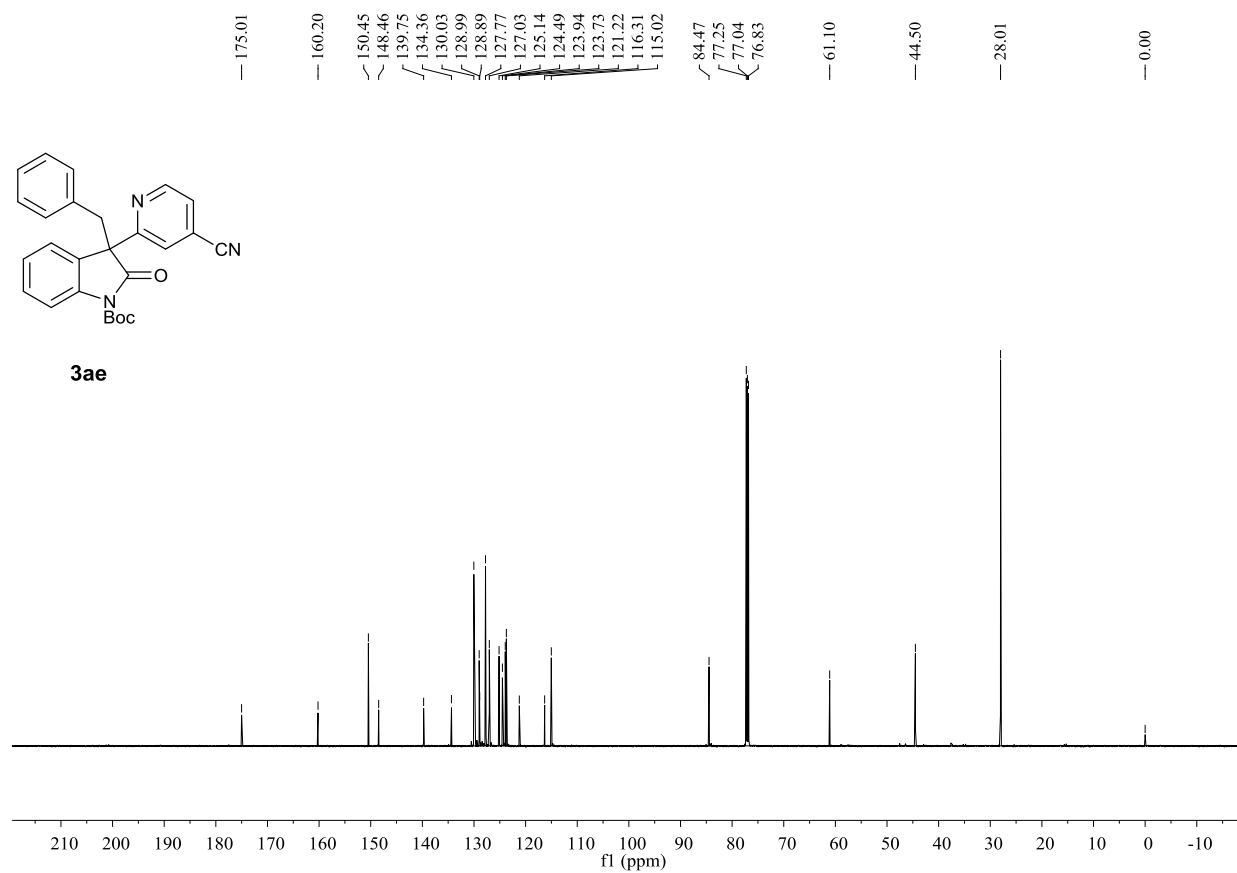

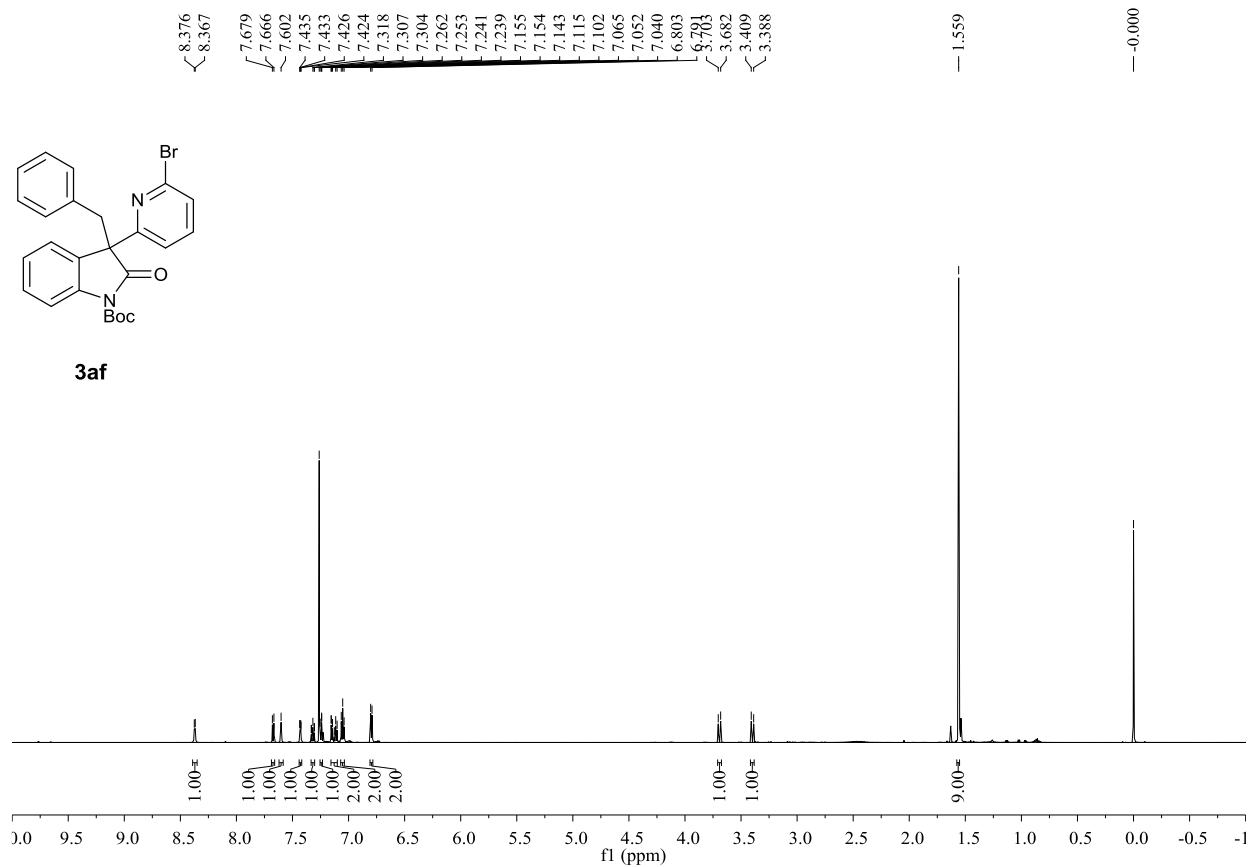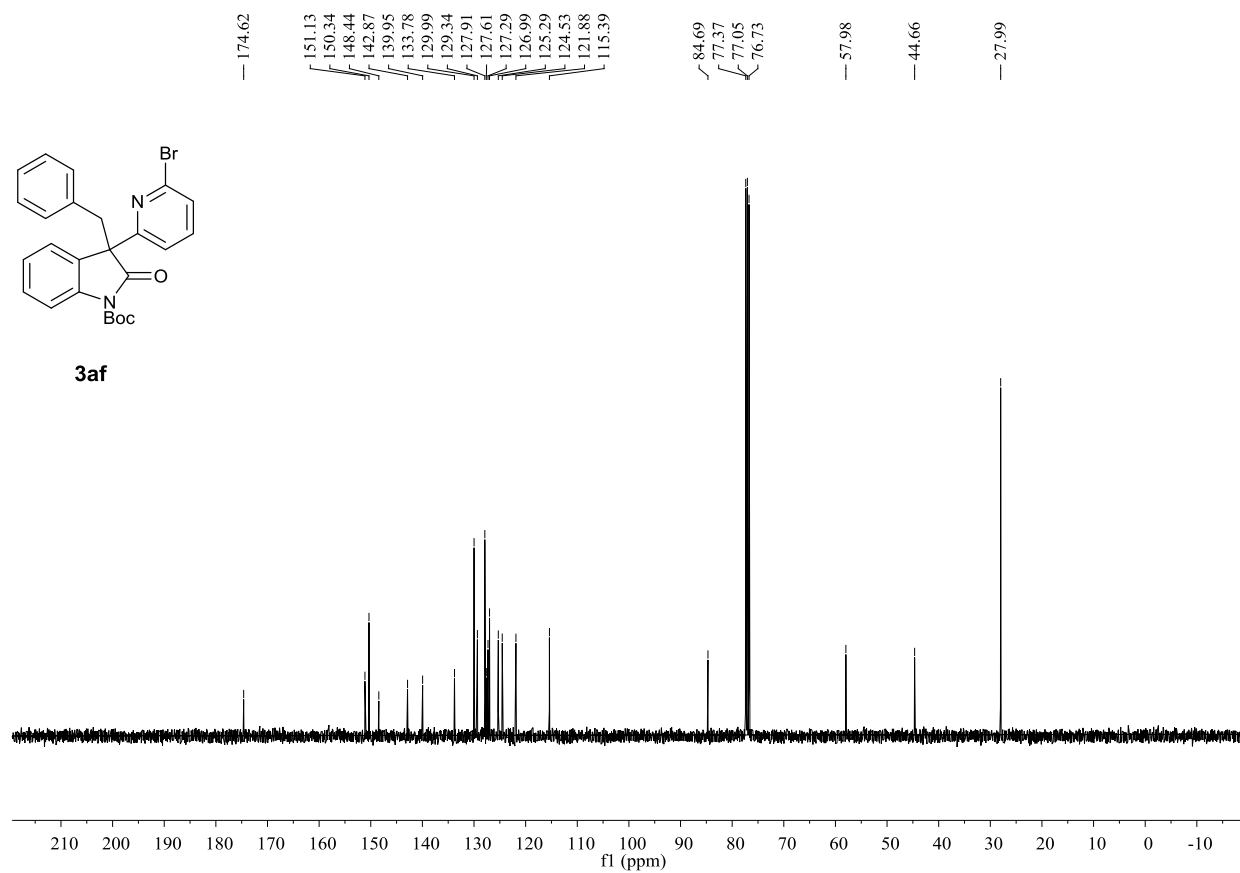

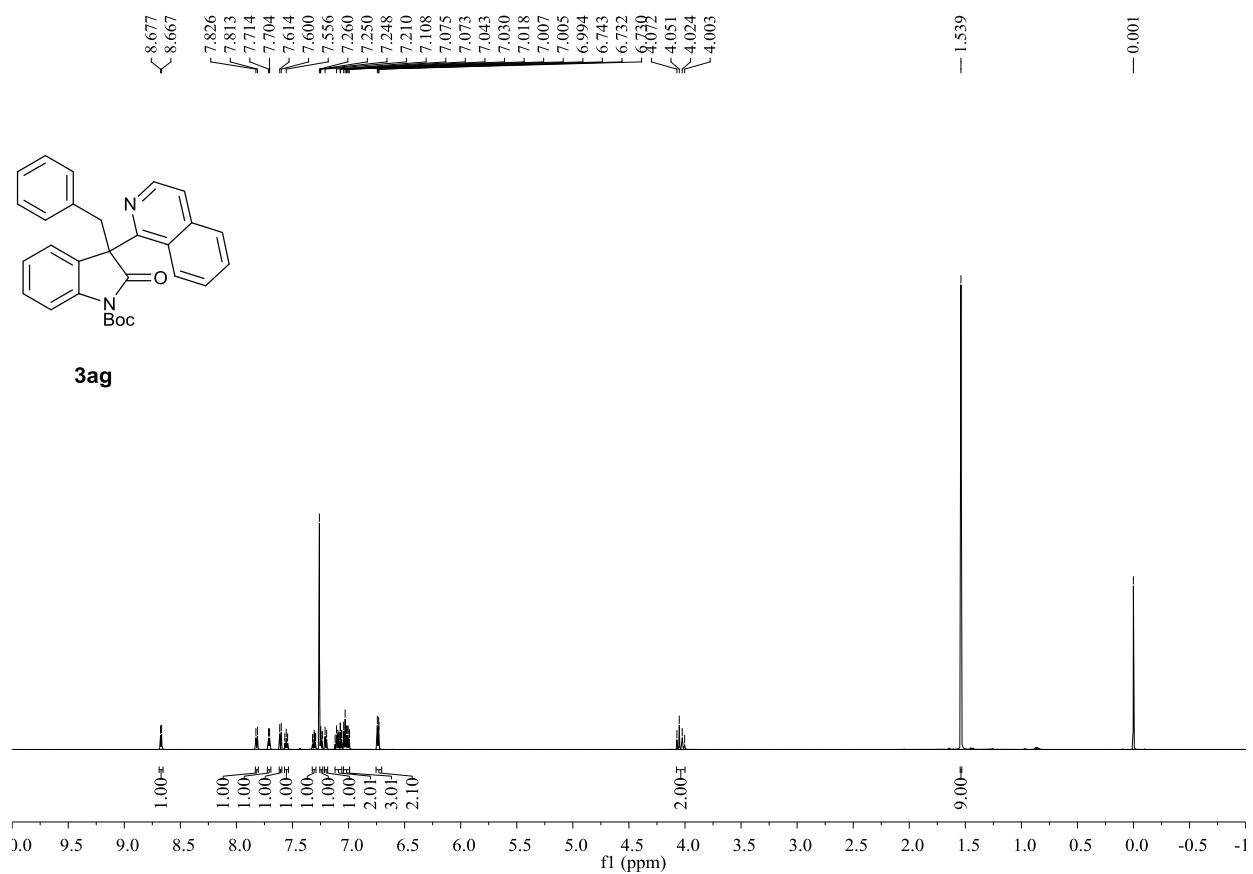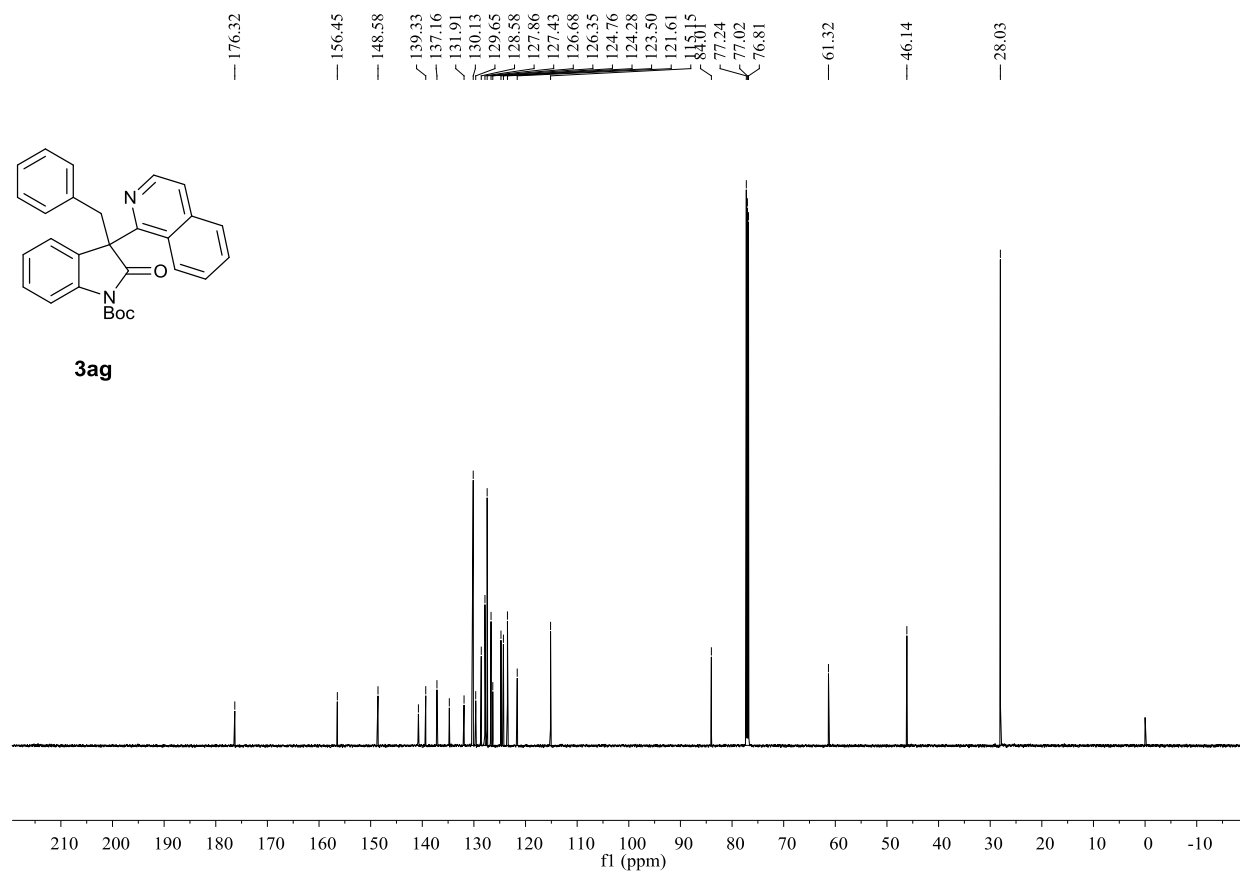

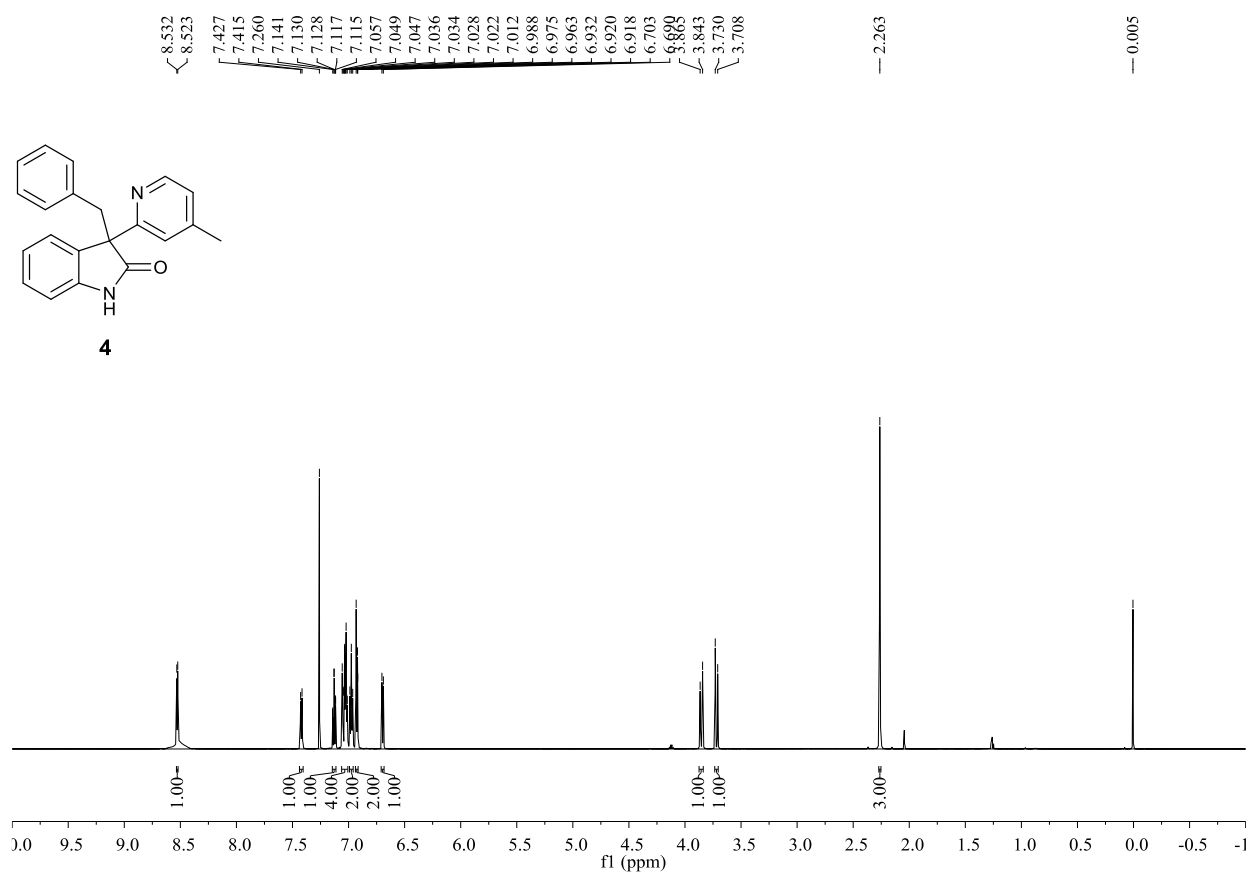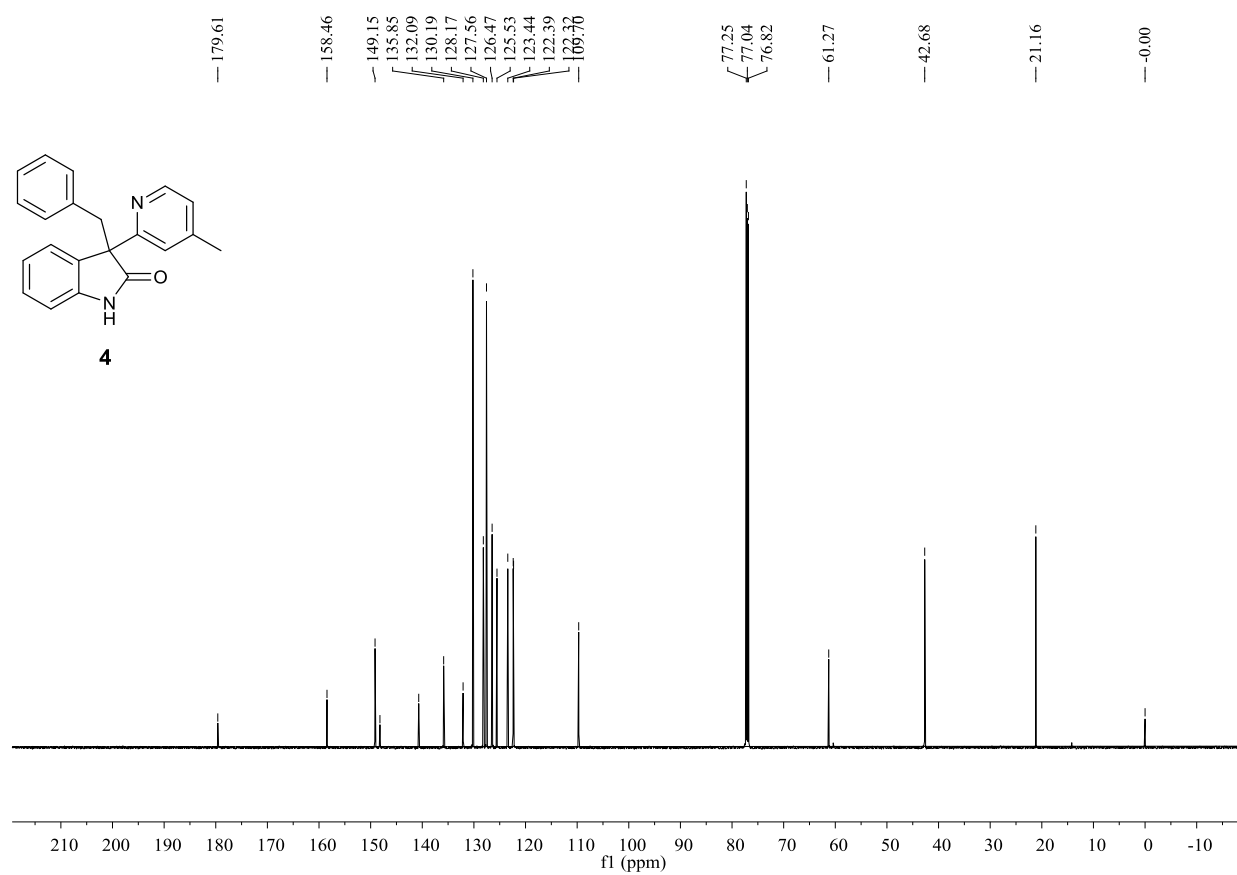

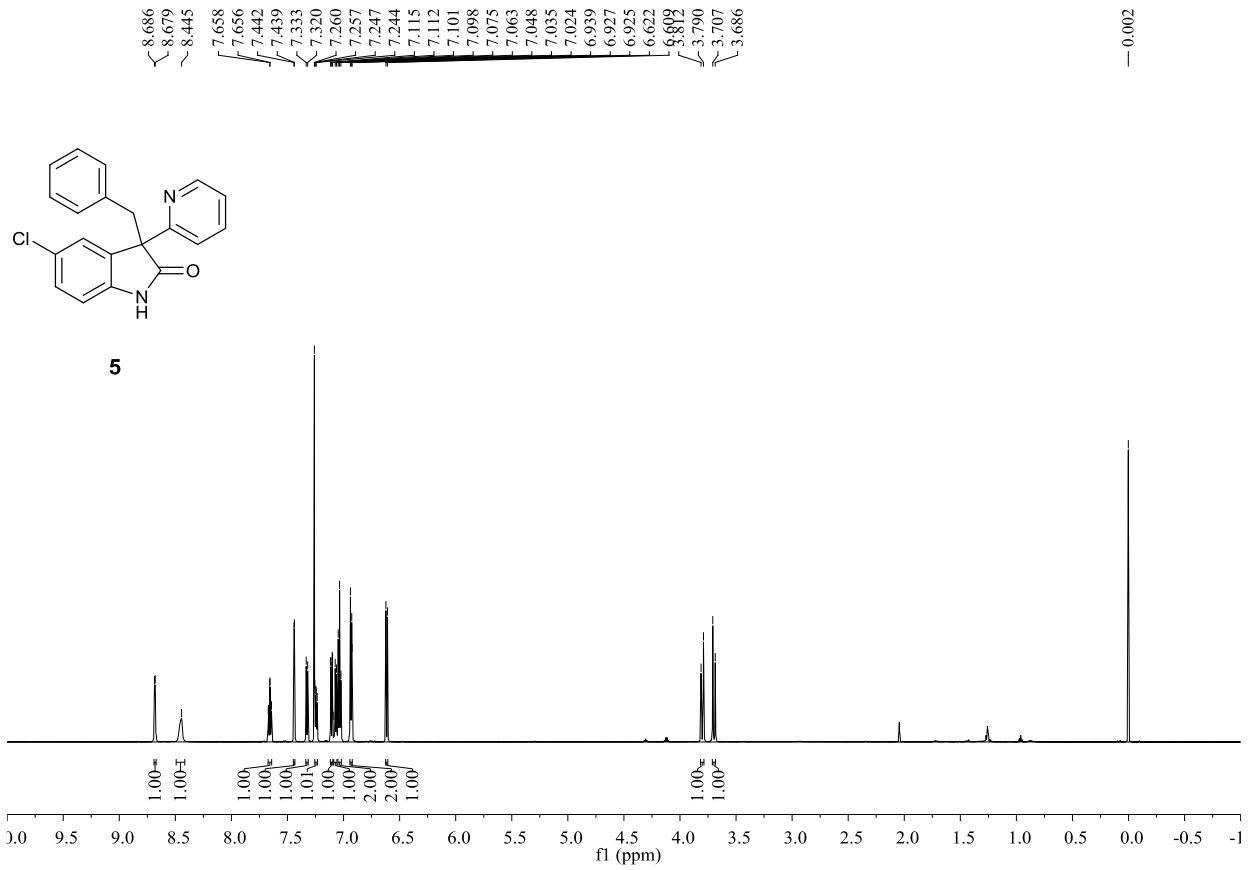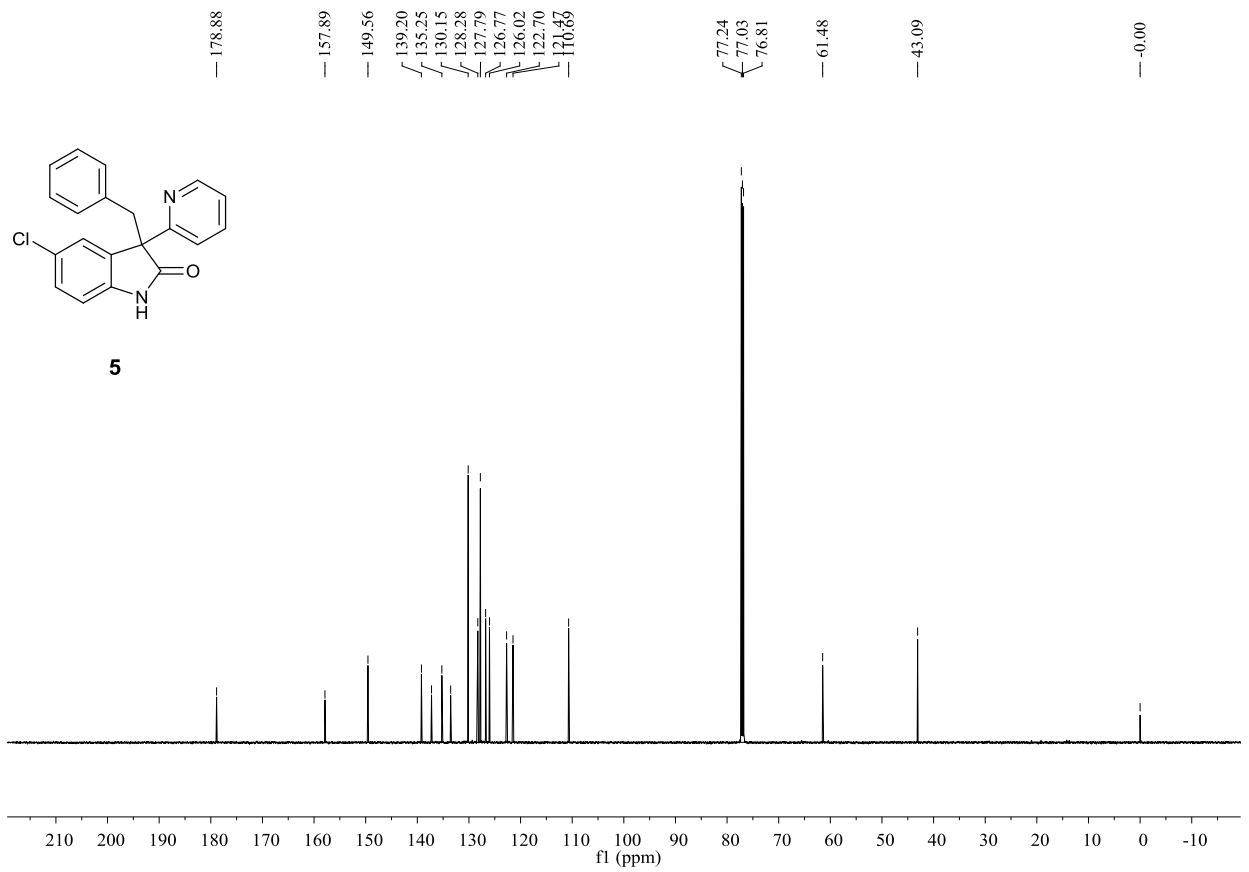

Supplement: d3nj04907h1.pdf [file d3nj04907h1.pdf]
